# Supplementary material for: Copper-catalyzed P–H insertion reactions of sulfoxonium ylides
Source: Royal Society of Chemistry journal article supplement (doi:10.1039/d1ob00948f), 2021-01-01

## Copper-Catalyzed P-H Insertion Reactions of Sulfoxonium Ylides

Xinzhi Zhang,<sup>a</sup> Yangyang Zhang,<sup>a</sup> Cuijian Liang<sup>a</sup> and Jun Jiang<sup>\*a,b</sup>

a. College of Chemistry and Chemical Engineering, Guangxi University, Nanning, 530004, P. R. China  
E-mail: jiangjun@gxu.edu.cn

b. Guangxi Key Laboratory of Electrochemical Energy Materials, Nanning, Guangxi 530004, P. R. China

### Supporting Information

#### Contents

|                                                                                                   |           |
|---------------------------------------------------------------------------------------------------|-----------|
| <b>1. General Information .....</b>                                                               | <b>2</b>  |
| <b>2. General Procedures .....</b>                                                                | <b>3</b>  |
| <b>2.1 General Procedure for Optimization of Reaction Conditions (Table 1 and Table S2) .....</b> | <b>3</b>  |
| <b>2.2 General Procedure for the Synthesis of Compounds 3a-u (Scheme 2, Scheme 3) .....</b>       | <b>4</b>  |
| <b>2.3 Scaled-Up Reaction .....</b>                                                               | <b>4</b>  |
| <b>3. Reference .....</b>                                                                         | <b>4</b>  |
| <b>4. Characterization datas for compounds .....</b>                                              | <b>5</b>  |
| <b>5. Copies of NMR Spectra .....</b>                                                             | <b>13</b> |

## 1. General Information

All the reactions were monitored by thin layer chromatography (TLC), carried out on 0.25 mm silica gel plates using UV light as visualizing agent. Column chromatography was carried out on silica gel (particle size 300-400 mesh). All the yields refer to isolated products after flash column chromatography. The solvent mixtures employed in flash column chromatography purifications are reported as volume by volume and in percentages. NMR spectra were recorded with BrukerAvance III HD500 spectrometer at 500 MHz. All  $^1\text{H}$ ,  $^{19}\text{F}$ ,  $^{31}\text{P}$  and  $^{13}\text{C}$  NMR spectra were recorded using  $\text{CDCl}_3$  as solvent. Tetramethylsilane (TMS) signals or residual solvent signals were used [TMS  $\delta = 0.00\text{ppm}$  ( $^1\text{H}$  NMR),  $\text{CDCl}_3$   $\delta = 7.26\text{ppm}$  ( $^1\text{H}$  NMR),  $\text{CDCl}_3$   $\delta = 77.16\text{ppm}$  ( $^{13}\text{C}$  NMR),] as internal standards. Coupling constants ( $J$ ) are reported in Hz. The following abbreviations were used to describe peak splitting patterns when appropriate: s = singlet, d = doublet, dd = double doublet, t = triplet, q = quartet, m = multiplet. HRMS (ESI) Mass spectra were recorded on Thermo Fisher Scientific LTQ FT Ultra. Melting points were determined on a microscopic apparatus and were uncorrected. The relative configuration of **3a** was determined by NMR Data and molecular weight compared with literature data.<sup>1</sup> Sulfoxonium ylides **1** and H-phosphine oxides **2** were prepared according to the published procedures.<sup>2,3</sup>

**Table S1.** Common abbreviations in the article

| Abbreviation | Full name             |
|--------------|-----------------------|
| PE           | Petroleum Ether       |
| EA           | Ethyl Acetate         |
| DCM          | Dichloromethane       |
| DMSO         | Dimethyl sulfoxide    |
| DMF          | N,N-Dimethylformamide |

## 2. General Procedures

### 2.1 General Procedure for Optimization of Reaction Conditions

(Table 1 and Table S2):

A 10 mL test tube was charged with diphenylphosphine oxide **2a** (0.2 mmol), catalyst (10 mol%), and DCM of 0.5 mL. Then, a solution of sulfoxonium ylides **1a** (0.1 mmol) in DCM (1.5 mL) was added dropwise. The reaction mixture was reacted under the indicated temperature in Table 1 and Table S2. Upon completion, the solution was purified by flash column chromatography on silica gel (PE: EA = 1:1) to give the product **3a** as white solid.

Table S2. Optimization of the Reaction Conditions<sup>a-c</sup>

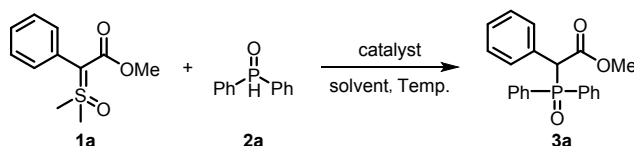

| Entry | Catalyst                                              | Solvent           | Temp.(°C) | Yield(%)          |
|-------|-------------------------------------------------------|-------------------|-----------|-------------------|
| 1     | [Ir(COD)Cl] <sub>2</sub>                              | DCM               | RT        | N.R. <sup>d</sup> |
| 2     | RuCl[(R,R)-Tsdpen](p-cymene)                          | DCM               | RT        | N.R.              |
| 3     | [RuCl(p-cymene)((S)-xylbinap)]Cl                      | DCM               | RT        | N.R.              |
| 4     | [RuCl(p-cymene)((S)-binap)]Cl                         | DCM               | RT        | N.R.              |
| 5     | [Ru(p-cymene)]Cl <sub>2</sub>                         | DCM               | RT        | N.R.              |
| 6     | AuCl                                                  | DCM               | RT        | N.R.              |
| 7     | RhCp*Cl <sub>2</sub>                                  | DCM               | RT        | N.R.              |
| 8     | CuCl                                                  | DCM               | RT        | 29                |
| 9     | Cu(acac) <sub>2</sub>                                 | DCM               | RT        | 43                |
| 10    | CuCN                                                  | DCM               | RT        | 29                |
| 11    | CuI                                                   | DCM               | RT        | 37                |
| 12    | CuBr <sub>2</sub>                                     | DCM               | RT        | 40                |
| 13    | CuTc                                                  | DCM               | RT        | 29                |
| 14    | Cu(OTf) <sub>2</sub>                                  | DCM               | RT        | 43                |
| 15    | [(CH <sub>3</sub> CN) <sub>4</sub> Cu]PF <sub>6</sub> | DCM               | RT        | 46                |
| 16    | Cu(OAc) <sub>2</sub>                                  | DCM               | RT        | 63                |
| 17    | Cu(OAc) <sub>2</sub>                                  | DMSO              | RT        | N.R.              |
| 18    | Cu(OAc) <sub>2</sub>                                  | DMF               | RT        | N.R.              |
| 19    | Cu(OAc) <sub>2</sub>                                  | CHCl <sub>3</sub> | RT        | 40                |
| 20    | Cu(OAc) <sub>2</sub>                                  | DCM               | 40        | 43                |
| 21    | Cu(OAc) <sub>2</sub>                                  | DCM               | 50        | 48                |
| 22    | -                                                     | DCM               | RT        | N.R.              |

<sup>a</sup> Reaction conduction: **1a** (0.1 mmol), **2a** (0.2 mmol), catalyst (10 mol %), solvent (2.0 mL). <sup>b</sup> Isolated yield. <sup>c</sup> React for 18-36 h. <sup>d</sup> N.R.=no reaction.

### 2.2 General Procedure for the Synthesis of Compounds 3a-u (Scheme

2, Scheme 3):

A 10 mL test tube was charged with diphenylphosphine oxide **2** (0.2 mmol), Cu(OAc)<sub>2</sub> (10 mol %), and DCM (0.5 mL). Then a solution of sulfoxonium ylides **1**

(0.1 mmol) in DCM (1.5 mL) was added dropwise. The reaction mixture was reacted at room temperature for 18-36 h until the sulfoxonium ylides **1** was completely consumed. After the reaction, the solution was purified by flash column chromatography on silica gel (PE: EA = 1:1) to give the product **3**.

### 2.3 Scaled-Up Reaction

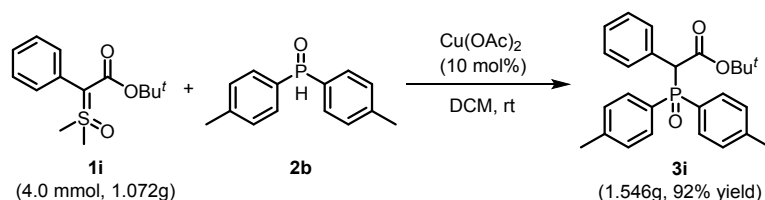

To a 250 mL round bottom flask was charged with diphenylphosphine oxide **2b** (8 mmol, 1.840g), catalyst  $\text{Cu}(\text{OAc})_2$  (72.0 mg, 10 mol%), and DCM (20.0 mL). Then the sulfoxonium ylides **1i** (4 mmol, 1.072g) solution in DCM (60.0 mL) was added dropwise. The reaction mixture was reacted at room temperature for 24 h until the sulfoxonium ylides **1i** was completely consumed. After the reaction, the solution was concentrated in vacuo and was purified by flash column chromatography on silica gel (PE: EA = 1:1) to give the product **3i** (1.546 g, 92%) as a white solid.

### 3. References

- (1) Z.-S.Chen, Z.-Z. Zhou, H.-L. Hua, X.-H. Duan, J.-Y. Luo, J. Wang, P.-X. Zhou and Y.-M. Liang, Reductive Coupling Reactions: A New Strategy for  $\text{C}(\text{sp}^3)\text{-P}$  Bond Formation, *Tetrahedron*, 2013, **69** (3), 1065.
- (2) H. Zhang, J. Huang and S. Yang, Copper(I) Bromide-Catalyzed for the Synthesis of Sulfoxonium Ylides, *Chin. J. Org. Chem.* 2015, **35** (9), 1961.
- (3) (a) J. Wang, G. Deng, C. Liu, Z. Chen, K. Yu, W. Chen, H. Zhang and X. Yang, Transition Metal-Free Synthesis of  $\alpha$ -Aminophosphine Oxides through  $\text{C}(\text{Sp}^3)\text{-P}$  Coupling of 2-Azaallyls, *Adv. Synth. Catal.* 2020, **362** (11), 2268. (b) L. Y. Kuo, D. C. Baker, A. K. Dortignacq and K. M. Dill, Phosphonothioate Hydrolysis by Molybdocene Dichlorides: Importance of Metal Interaction with the Sulfur of the Thiolate Leaving Group, *Organometallics* 2013, **32** (17), 4759. (c) B. M. Trost, S. M. Spohr, A. B. Rolka and C. A. Kalnmals, Desymmetrization of Phosphinic Acids via Pd-Catalyzed Asymmetric Allylic Alkylation: Rapid Access to *P*-Chiral Phosphinates, *J. Am. Chem. Soc.* 2019, **141** (36), 14098.

## 4. Characterization datas for compounds

**Methyl 2-(diphenylphosphoryl)-2-phenylacetate (3a):** White solid, m.p. 206.5-

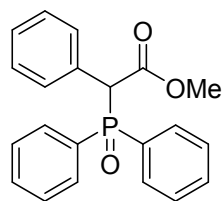

208.0 °C, 22.0 mg, Yield: 63%;  $^1\text{H NMR}$  (500 MHz, Chloroform-*d*)  $\delta$  7.94 – 7.88 (m, 2H), 7.61 – 7.53 (m, 3H), 7.53 – 7.46 (m, 2H), 7.46 – 7.36 (m, 3H), 7.36 – 7.30 (m, 2H), 7.24 – 7.19 (m, 3H), 4.71 (d,  $J = 11.4$  Hz, 1H), 3.53 (s, 3H).  $^{13}\text{C NMR}$  (126 MHz, Chloroform-*d*)  $\delta$  168.31 (d,  $J = 3.1$  Hz), 132.18 (d,  $J = 2.8$  Hz), 131.92 (d,  $J = 2.9$  Hz), 131.71 (d,  $J = 9.1$  Hz), 131.36 (d,  $J = 9.1$  Hz), 130.86 (d,  $J = 102.4$  Hz), 130.56 (d,  $J = 100.4$  Hz), 130.23 (d,  $J = 5.3$  Hz), 130.18 (d,  $J = 5.1$  Hz), 128.40 (d,  $J = 20.5$  Hz), 128.30 (d,  $J = 21.2$  Hz), 128.33 (d,  $J = 2.3$  Hz), 127.92 (d,  $J = 2.3$  Hz), 55.59 (d,  $J = 58.4$  Hz), 52.60.  $^{31}\text{P NMR}$  (202 MHz, Chloroform-*d*)  $\delta$  27.32. **HRMS** (ESI)  $m/z$ : calcd for  $\text{C}_{21}\text{H}_{20}\text{O}_3\text{P}$   $[\text{M}+\text{H}]^+$ : 351.1145; found: 351.1153.

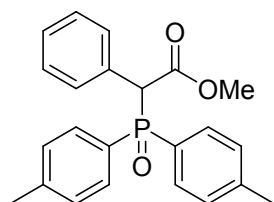

**Methyl 2-(di-p-tolylphosphoryl)-2-phenylacetate (3b):**

White solid, m.p. 181.6-182.8 °C, 29.1 mg, Yield: 77%;  $^1\text{H NMR}$  (500 MHz, Chloroform-*d*)  $\delta$  7.79 – 7.72 (m, 2H), 7.47 – 7.40 (m, 2H), 7.40 – 7.36 (m, 2H), 7.30 – 7.26 (m, 2H), 7.24 – 7.19 (m, 3H), 7.15 – 7.10 (m, 2H), 4.66 (d,  $J = 11.5$  Hz, 1H), 3.54 (s, 3H), 2.40 (s, 3H), 2.31 (s, 3H).  $^{13}\text{C NMR}$  (126 MHz, Chloroform-*d*)  $\delta$  168.51 (d,  $J = 3.0$  Hz), 142.58 (d,  $J = 2.8$  Hz), 142.32 (d,  $J = 2.9$  Hz), 131.71 (d,  $J = 9.5$  Hz), 131.39 (d,  $J = 9.4$  Hz), 130.47 (d,  $J = 6.4$  Hz), 130.24 (d,  $J = 5.1$  Hz), 129.14 (d,  $J = 12.4$  Hz), 128.98 (d,  $J = 12.5$  Hz), 128.28 (d,  $J = 1.8$  Hz), 128.00 (d,  $J = 45.7$  Hz), 127.81 (d,  $J = 2.2$  Hz), 127.17 (d,  $J = 44.1$  Hz), 55.77 (d,  $J = 58.3$  Hz), 52.57, 21.62 (d,  $J = 0.9$  Hz), 21.52 (d,  $J = 1.0$  Hz).  $^{31}\text{P NMR}$  (202 MHz, Chloroform-*d*)  $\delta$  27.72. **HRMS** (ESI)  $m/z$ : calcd for  $\text{C}_{23}\text{H}_{24}\text{O}_3\text{P}$   $[\text{M}+\text{H}]^+$ : 379.1458; found: 379.1468.

**Methyl 2-(bis(4-methoxyphenyl)phosphoryl)-2-phenylacetate (3c):** White solid,

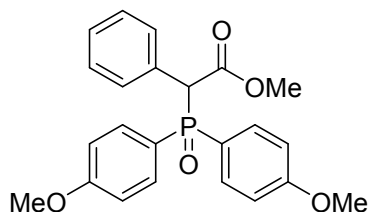

m.p. 124.8-126.0 °C, 25.8 mg, Yield: 63%;  $^1\text{H NMR}$  (500 MHz, Chloroform-*d*)  $\delta$  7.81 – 7.74 (m, 2H), 7.50 – 7.43 (m, 2H), 7.39 – 7.33 (m, 2H), 7.24 – 7.20 (m, 3H), 7.01 – 6.95 (m, 2H), 6.87 – 6.81 (m, 2H), 4.64 (d,  $J = 12.3$  Hz, 1H), 3.85 (s, 3H), 3.79 (s, 3H), 3.56 (s, 3H).  $^{13}\text{C NMR}$  (126 MHz, Chloroform-*d*)  $\delta$  168.67 (d,  $J = 2.8$  Hz), 162.59 (d,  $J = 2.8$  Hz), 162.35 (d,  $J = 2.9$  Hz), 133.71 (d,  $J = 10.4$  Hz), 133.33 (d,  $J = 10.5$  Hz), 130.59 (d,  $J = 6.4$  Hz), 130.19 (d,  $J = 5.0$  Hz), 128.29 (d,  $J = 2.0$  Hz), 127.81 (d,  $J = 2.5$  Hz), 122.32 (d,  $J = 109.4$  Hz), 121.62 (d,  $J = 107.6$  Hz), 113.95 (d,  $J = 13.0$  Hz), 113.79 (d,

$J = 13.1$  Hz), 56.16 (d,  $J = 58.7$  Hz), 55.34, 55.28, 52.59.  $^{31}\text{P}$  NMR (202 MHz, Chloroform-*d*)  $\delta$  27.68. HRMS (ESI)  $m/z$ : calcd for  $\text{C}_{23}\text{H}_{24}\text{O}_5\text{P}$   $[\text{M}+\text{H}]^+$ : 411.1356; found: 411.1362.

**Methyl 2-(bis(benzo[d][1,3]dioxol-4-yl)phosphoryl)-2-phenylacetate (3d):** White

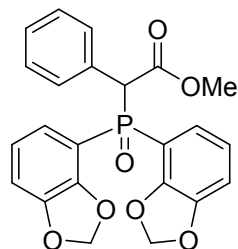

solid, m.p. 172.8-174.5 °C, 18.0 mg, Yield: 41%;  $^1\text{H}$  NMR (500 MHz, Chloroform-*d*)  $\delta$  7.43 – 7.37 (m, 3H), 7.30 – 7.23 (m, 4H), 7.10 – 7.05 (m, 1H), 6.97 – 6.89 (m, 2H), 6.77 – 6.74 (m, 1H), 6.03 (s, 2H), 5.97 – 5.94 (m, 2H), 4.61 (d,  $J = 11.9$  Hz, 1H), 3.59 (s, 3H).  $^{13}\text{C}$  NMR (126 MHz, Chloroform-*d*)  $\delta$  168.53 (d,  $J = 2.8$  Hz), 151.14 (d,  $J = 3.0$  Hz), 150.86 (d,  $J = 2.9$  Hz), 148.05 (d,  $J = 18.4$  Hz), 147.87 (d,  $J = 18.4$  Hz), 130.48 (d,  $J = 6.4$  Hz), 130.29 (d,  $J = 5.2$  Hz), 128.49 (d,  $J = 1.8$  Hz), 128.08 (d,  $J = 2.3$  Hz), 127.31 (d,  $J = 10.0$  Hz), 127.02 (d,  $J = 10.1$  Hz), 124.33 (d,  $J = 69.2$  Hz), 123.48 (d,  $J = 67.2$  Hz), 111.30 (d,  $J = 12.0$  Hz), 110.97 (d,  $J = 12.0$  Hz), 108.77 (d,  $J = 15.1$  Hz), 108.59 (d,  $J = 15.2$  Hz), 101.80, 101.70, 55.96 (d,  $J = 59.9$  Hz), 52.83.  $^{31}\text{P}$  NMR (202 MHz, Chloroform-*d*)  $\delta$  27.71. HRMS (ESI)  $m/z$ : calcd for  $\text{C}_{23}\text{H}_{20}\text{O}_7\text{P}$   $[\text{M}+\text{H}]^+$ : 439.0941; found: 439.0952.

**Methyl 2-(ethoxy(phenyl)phosphoryl)-2-phenylacetate (3e):** colorless oil, 28.0 mg,

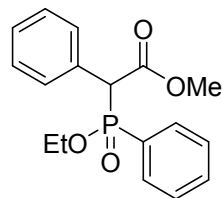

Yield: 88%;  $^1\text{H}$  NMR (500 MHz, Chloroform-*d*)  $\delta$  7.54 – 7.49 (m, 3H), 7.37 – 7.33 (m, 4H), 7.27 – 7.24 (m, 3H), 4.35 (d,  $J = 2.4$  Hz, 1H), 4.06 – 3.98 (m, 2H), 3.65 (s, 3H), 1.32 (t,  $J = 7.0$  Hz, 3H).  $^{13}\text{C}$  NMR (126 MHz, Chloroform-*d*)  $\delta$  168.24 (d,  $J = 2.3$  Hz), 132.59 (d,  $J = 2.9$  Hz), 132.51 (d,  $J = 2.7$  Hz), 130.47 (d,  $J = 6.0$  Hz), 129.84 (d,  $J = 5.4$  Hz), 129.33 (d,  $J = 36.4$  Hz), 128.30 (d,  $J = 2.3$  Hz), 128.14 (d,  $J = 13.2$  Hz), 127.85 (d,  $J = 2.8$  Hz), 61.99 (d,  $J = 6.6$  Hz), 55.76 (d,  $J = 86.9$  Hz), 52.55, 16.38 (d,  $J = 6.3$  Hz).  $^{31}\text{P}$  NMR (202 MHz, Chloroform-*d*)  $\delta$  34.32. HRMS (ESI)  $m/z$ : calcd for  $\text{C}_{17}\text{H}_{20}\text{O}_4\text{P}$   $[\text{M}+\text{H}]^+$ : 319.1094; found: 319.1099.

**Methyl 2-(benzyl(phenyl)phosphoryl)-2-phenylacetate (3f):** White solid, m.p.

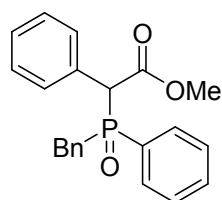

165.0-167.3 °C, 20.2 mg, Yield: 55%;  $^1\text{H}$  NMR (500 MHz, Chloroform-*d*)  $\delta$  7.57 – 7.51 (m, 2H), 7.51 – 7.43 (m, 1H), 7.39 – 7.33 (m, 2H), 7.31 – 7.27 (m, 5H), 7.20 – 7.12 (m, 5H), 4.36 (d,  $J = 14.6$  Hz, 1H), 3.62 (s, 3H), 3.60 – 3.50 (m, 1H), 3.41 – 3.34 (m, 1H).  $^{13}\text{C}$  NMR (126 MHz, Chloroform-*d*)  $\delta$  168.85 (d,  $J = 1.4$  Hz), 132.10 (d,  $J = 2.6$  Hz), 131.80 (d,  $J = 8.7$  Hz), 130.60 (d,  $J = 20.6$  Hz), 130.59 (d,  $J = 7.0$  Hz), 130.27 (d,  $J = 5.7$  Hz), 130.16 (d,  $J = 5.4$  Hz), 129.88 (d,  $J = 4.7$  Hz), 128.60 (d,  $J = 1.6$  Hz),

128.47 (d,  $J = 2.3$  Hz), 128.07 (d,  $J = 2.0$  Hz), 128.07 (d,  $J = 11.8$  Hz), 126.93 (d,  $J = 2.8$  Hz), 55.20 (d,  $J = 56.1$  Hz), 52.67, 35.28 (d,  $J = 64.7$  Hz).  $^{31}\text{P}$  NMR (202 MHz, Chloroform- $d$ )  $\delta$  34.68. HRMS (ESI)  $m/z$ : calcd for  $\text{C}_{22}\text{H}_{22}\text{O}_3\text{P}$   $[\text{M}+\text{H}]^+$ : 365.1301; found: 365.1309.

**Ethyl 2-(di-*p*-tolylphosphoryl)-2-phenylacetate (3g):** White solid, m.p. 184.2-186.0

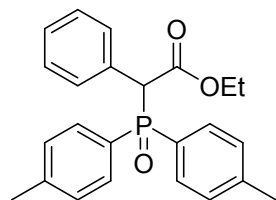

$^{\circ}\text{C}$ , 31.0 mg, Yield: 79%;  $^1\text{H}$  NMR (500 MHz, Chloroform- $d$ )  $\delta$  7.81 – 7.74 (m, 2H), 7.48 – 7.37 (m, 4H), 7.31 – 7.27 (m, 2H), 7.23 – 7.21 (m, 3H), 7.15 – 7.10 (m, 2H), 4.64 (d,  $J = 11.6$  Hz, 1H), 4.02 – 3.96 (m, 2H), 2.40 (s, 3H), 2.31 (s, 3H), 0.99 (t,  $J = 7.1$  Hz, 3H).  $^{13}\text{C}$  NMR (126 MHz, Chloroform- $d$ )  $\delta$  168.07 (d,  $J = 3.0$  Hz), 142.65 (d,  $J = 2.9$  Hz), 142.38 (d,  $J = 2.8$  Hz), 131.97 (d,  $J = 9.4$  Hz), 131.49 (d,  $J = 9.4$  Hz), 130.69 (d,  $J = 6.4$  Hz), 130.39 (d,  $J = 5.1$  Hz), 129.19 (d,  $J = 13.0$  Hz), 129.09 (d,  $J = 12.9$  Hz), 128.36 (d,  $J = 1.7$  Hz), 128.27 (d,  $J = 67.0$  Hz), 127.87 (d,  $J = 2.3$  Hz), 127.44 (d,  $J = 65.1$  Hz), 61.71, 55.91 (d,  $J = 58.3$  Hz), 21.73, 21.64, 13.86.  $^{31}\text{P}$  NMR (202 MHz, Chloroform- $d$ )  $\delta$  27.58. HRMS (ESI)  $m/z$ : calcd for  $\text{C}_{24}\text{H}_{26}\text{O}_3\text{P}$   $[\text{M}+\text{H}]^+$ : 393.1614; found: 393.1620.

**Benzyl 2-(di-*p*-tolylphosphoryl)-2-phenylacetate (3h):** White solid, m.p. 169.5-

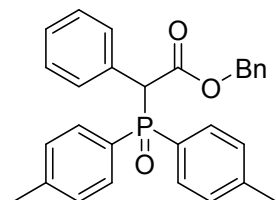

171.5  $^{\circ}\text{C}$ , 28.1 mg, Yield: 62%;  $^1\text{H}$  NMR (500 MHz, Chloroform- $d$ )  $\delta$  7.77 – 7.71 (m, 2H), 7.46 – 7.40 (m, 4H), 7.31 – 7.25 (m, 3H), 7.24 – 7.20 (m, 5H), 7.12 – 7.07 (m, 4H), 5.03 – 4.90 (m, 2H), 4.71 (d,  $J = 11.3$  Hz, 1H), 2.39 (s, 3H), 2.31 (s, 3H).  $^{13}\text{C}$  NMR (126 MHz, Chloroform- $d$ )  $\delta$  167.82 (d,  $J = 2.9$  Hz), 142.51 (d,  $J = 2.8$  Hz), 142.29 (d,  $J = 2.8$  Hz), 135.07, 131.78 (d,  $J = 9.5$  Hz), 131.34 (d,  $J = 9.4$  Hz), 130.48 (d,  $J = 6.4$  Hz), 130.32 (d,  $J = 5.1$  Hz), 129.16 (d,  $J = 12.4$  Hz), 129.01 (d,  $J = 12.5$  Hz), 128.37, 128.35, 128.29 (d,  $J = 1.7$  Hz), 128.14, 128.01 (d,  $J = 68.57$  Hz), 127.82 (d,  $J = 2.2$  Hz), 127.18 (d,  $J = 65.7$  Hz), 67.41, 55.57 (d,  $J = 58.0$  Hz), 21.66, 21.54.  $^{31}\text{P}$  NMR (202 MHz, Chloroform- $d$ )  $\delta$  27.67. HRMS (ESI)  $m/z$ : calcd for  $\text{C}_{29}\text{H}_{28}\text{O}_3\text{P}$   $[\text{M}+\text{H}]^+$ : 455.1771; found: 455.1774.

**Tert-butyl 2-(di-*p*-tolylphosphoryl)-2-phenylacetate (3i):** White solid, m.p. 212.3-

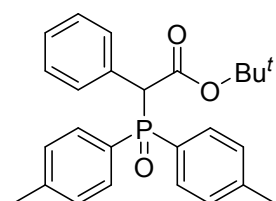

213.4  $^{\circ}\text{C}$ , 39.0 mg, Yield: 93%;  $^1\text{H}$  NMR (500 MHz, Chloroform- $d$ )  $\delta$  7.86 – 7.80 (m, 2H), 7.46 – 7.37 (m, 4H), 7.31 – 7.27 (m, 2H), 7.22 – 7.18 (m, 3H), 7.10 – 7.06 (m, 2H), 4.56 (d,  $J = 11.1$  Hz, 1H), 2.39 (s, 3H), 2.28 (s, 3H), 1.18 (s, 9H).  $^{13}\text{C}$  NMR (126 MHz, Chloroform- $d$ )  $\delta$  166.76 (d,  $J = 3.1$  Hz), 142.32 (d,  $J = 2.8$

(Hz), 141.98 (d,  $J = 2.7$  Hz), 131.95 (d,  $J = 9.3$  Hz), 131.22 (d,  $J = 9.3$  Hz), 130.98 (d,  $J = 6.4$  Hz), 130.28 (d,  $J = 5.2$  Hz), 129.00 (d,  $J = 12.3$  Hz), 128.87 (d,  $J = 12.4$  Hz), 128.63 (d,  $J = 89.4$  Hz), 128.12 (d,  $J = 1.6$  Hz), 127.80 (d,  $J = 87.3$  Hz), 127.53 (d,  $J = 2.2$  Hz), 82.21, 56.33 (d,  $J = 58.5$  Hz), 27.57, 21.58, 21.47.  $^{31}\text{P}$  NMR (202 MHz, Chloroform-*d*)  $\delta$  27.38. HRMS (ESI)  $m/z$ : calcd for  $\text{C}_{26}\text{H}_{30}\text{O}_3\text{P}$   $[\text{M}+\text{H}]^+$ : 421.1927; found: 421.1936.

**Tert-butyl 2-(diphenylphosphoryl)-2-phenylacetate (3j):** White solid, m.p. 196.3-

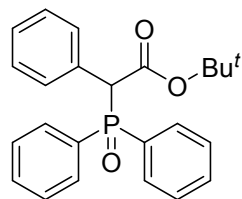

197.8 °C, 30.6 mg, Yield: 78%;  $^1\text{H}$  NMR (500 MHz, Chloroform-*d*)  $\delta$  8.01 – 7.96 (m, 2H), 7.58 – 7.51 (m, 5H), 7.44 – 7.35 (m, 3H), 7.33 – 7.27 (m, 2H), 7.24 – 7.17 (m, 3H), 4.60 (d,  $J = 11.0$  Hz, 1H), 1.18 (s, 9H).  $^{13}\text{C}$  NMR (126 MHz, Chloroform-*d*)  $\delta$  166.70 (d,  $J = 3.2$  Hz), 132.10 (d,  $J = 8.9$  Hz), 132.10 (d,  $J = 2.9$  Hz), 131.91 (d,  $J = 78.8$  Hz), 131.79 (d,  $J = 2.7$  Hz), 131.35 (d,  $J = 9.0$  Hz), 131.11 (d,  $J = 77.3$  Hz), 130.83 (d,  $J = 6.3$  Hz), 130.43 (d,  $J = 5.2$  Hz), 128.49 (d,  $J = 12.0$  Hz), 128.34 (d,  $J = 1.9$  Hz), 128.31 (d,  $J = 11.8$  Hz), 127.81 (d,  $J = 2.3$  Hz), 82.58, 56.35 (d,  $J = 58.6$  Hz), 27.71.  $^{31}\text{P}$  NMR (202 MHz, Chloroform-*d*)  $\delta$  26.89. HRMS (ESI)  $m/z$ : calcd for  $\text{C}_{24}\text{H}_{26}\text{O}_3\text{P}$   $[\text{M}+\text{H}]^+$ : 393.1614; found: 393.1619.

**Tert-butyl 2-(benzyl(phenyl)phosphoryl)-2-phenylacetate (3k):** White solid, m.p.

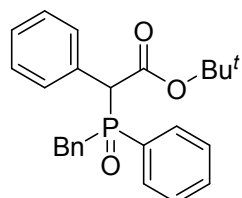

182.8-185.0 °C, 37.4 mg, Yield: 92%;  $^1\text{H}$  NMR (500 MHz, Chloroform-*d*)  $\delta$  7.63 – 7.53 (m, 2H), 7.51 – 7.40 (m, 3H), 7.41 – 7.28 (m, 5H), 7.16 – 7.10 (m, 3H), 7.02 – 6.98 (m, 2H), 4.29 (d,  $J = 12.6$  Hz, 1H), 3.44 – 3.36 (m, 1H), 3.26 – 3.19 (m, 1H), 1.24 (s, 9H).  $^{13}\text{C}$  NMR (126 MHz, Chloroform-*d*)  $\delta$  166.80 (d,  $J = 2.7$  Hz), 131.81 (d,  $J = 8.5$  Hz), 131.79 (d,  $J = 3.2$  Hz), 131.20 (d,  $J = 5.9$  Hz), 130.85 (d,  $J = 7.7$  Hz), 130.15 (d,  $J = 5.2$  Hz), 130.09 (d,  $J = 5.5$  Hz), 130.06 (d,  $J = 96.0$  Hz), 128.54 (d,  $J = 1.7$  Hz), 128.29 (d,  $J = 2.5$  Hz), 127.97 (d,  $J = 11.9$  Hz), 127.91 (d,  $J = 2.3$  Hz), 126.71 (d,  $J = 3.0$  Hz), 82.44, 55.75 (d,  $J = 55.8$  Hz), 36.22 (d,  $J = 65.1$  Hz), 27.66.  $^{31}\text{P}$  NMR (202 MHz, Chloroform-*d*)  $\delta$  26.89. HRMS (ESI)  $m/z$ : calcd for  $\text{C}_{25}\text{H}_{28}\text{O}_3\text{P}$   $[\text{M}+\text{H}]^+$ : 407.1771; found: 407.1774.

**Methyl 2-(di-p-tolylphosphoryl)-2-(naphthalen-2-yl)acetate (3l):** White solid, m.p.

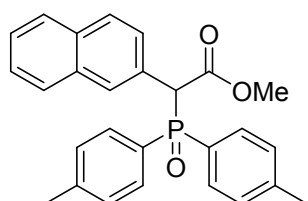

172.0-173.6 °C, 36.4 mg, Yield: 85%;  $^1\text{H}$  NMR (500 MHz, Chloroform-*d*)  $\delta$  7.90 – 7.88 (m, 1H), 7.83 – 7.68 (m, 5H), 7.56 – 7.39 (m, 5H), 7.31 – 7.27 (m, 2H), 7.12 – 7.08 (m, 2H), 4.87 (d,  $J = 11.6$  Hz, 1H), 3.56 (s, 3H), 2.40



(s, 3H), 2.28 (s, 3H).  $^{13}\text{C}$  NMR (126 MHz, Chloroform-*d*)  $\delta$  168.63 (d,  $J = 2.9$  Hz), 142.67 (d,  $J = 2.8$  Hz), 142.44 (d,  $J = 2.8$  Hz), 133.13 (d,  $J = 2.0$  Hz), 132.78 (d,  $J = 1.6$  Hz), 131.78 (d,  $J = 9.4$  Hz), 131.49 (d,  $J = 9.5$  Hz), 129.63 (d,  $J = 6.3$  Hz), 129.24 (d,  $J = 12.4$  Hz), 129.09 (d,  $J = 12.4$  Hz), 128.17, 128.12 (d,  $J = 25.5$  Hz), 127.97 – 127.88 (m), 127.54, 127.29 (d,  $J = 23.5$  Hz), 126.20, 126.05, 55.95 (d,  $J = 58.4$  Hz), 52.69, 21.69, 21.60.  $^{31}\text{P}$  NMR (202 MHz, Chloroform-*d*)  $\delta$  27.65. HRMS (ESI)  $m/z$ : calcd for  $\text{C}_{27}\text{H}_{26}\text{O}_3\text{P}$   $[\text{M}+\text{H}]^+$ : 429.1614; found: 429.1620.

**Methyl 2-(di-*p*-tolylphosphoryl)-2-(naphthalen-1-yl)acetate (3m):** colorless oil,

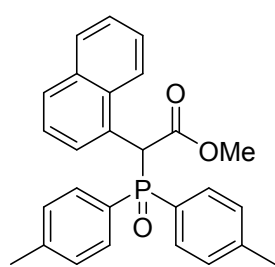

36.4 mg, Yield: 85%;  $^1\text{H}$  NMR (500 MHz, Chloroform-*d*)  $\delta$  8.25 – 8.19 (m, 1H), 7.84 – 7.77 (m, 4H), 7.56 – 7.54 (m, 1H), 7.50 – 7.44 (m, 2H), 7.44 – 7.35 (m, 3H), 7.30 – 7.26 (m, 2H), 6.97 – 6.93 (m, 2H), 6.41 (d,  $J = 10.2$  Hz, 1H), 3.62 (s, 3H), 2.39 (s, 3H), 2.24 (s, 3H).  $^{13}\text{C}$  NMR (126 MHz, Chloroform-*d*)  $\delta$  170.16 (d,  $J = 5.1$  Hz), 142.87 (d,  $J = 2.9$  Hz), 142.57 (d,  $J = 2.9$  Hz), 133.97, 131.83 (d,  $J = 11.1$  Hz), 131.74 (d,  $J = 10.8$  Hz), 131.62 (d,  $J = 3.9$  Hz), 130.73, 129.94, 129.26 (d,  $J = 13.9$  Hz), 128.85 (d,  $J = 13.9$  Hz), 128.70, 128.42 (d,  $J = 141.2$  Hz), 127.75 (d,  $J = 137.9$  Hz), 127.68, 126.79, 125.97, 125.19, 124.14, 73.24 (d,  $J = 5.0$  Hz), 52.76, 21.77 (d,  $J = 1.0$  Hz), 21.58 (d,  $J = 1.1$  Hz).  $^{31}\text{P}$  NMR (202 MHz, Chloroform-*d*)  $\delta$  35.35. HRMS (ESI)  $m/z$ : calcd for  $\text{C}_{27}\text{H}_{26}\text{O}_3\text{P}$   $[\text{M}+\text{H}]^+$ : 429.1614; found: 429.1614.

**Methyl 2-([1,1'-biphenyl]-4-yl)-2-(di-*p*-tolylphosphoryl)acetate (3n):** White solid,

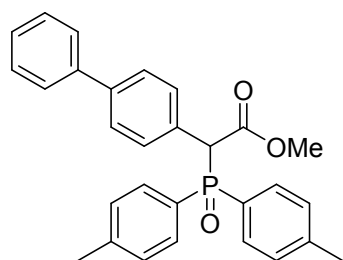

m.p. 181.6-183.5 °C, 39.0 mg, Yield: 86%;  $^1\text{H}$  NMR (500 MHz, Chloroform-*d*)  $\delta$  7.82 – 7.76 (m, 2H), 7.57 – 7.44 (m, 8H), 7.43 – 7.39 (m, 2H), 7.33 – 7.28 (m, 3H), 7.17 – 7.13 (m, 2H), 4.74 (d,  $J = 11.6$  Hz, 1H), 3.56 (s, 3H), 2.41 (s, 3H), 2.33 (s, 3H).  $^{13}\text{C}$  NMR (126 MHz, Chloroform-*d*)  $\delta$  168.54 (d,  $J = 3.2$  Hz), 142.66 (d,  $J = 2.9$  Hz), 142.43 (d,  $J = 2.8$  Hz), 140.57 (d,  $J = 2.5$  Hz), 140.50, 131.76 (d,  $J = 9.5$  Hz), 131.45 (d,  $J = 9.4$  Hz), 130.64 (d,  $J = 5.1$  Hz), 129.49 (d,  $J = 6.5$  Hz), 129.19 (d,  $J = 12.5$  Hz), 129.08 (d,  $J = 12.6$  Hz), 128.75, 127.81 (d,  $J = 98.8$  Hz), 127.44 (d,  $J = 95.9$  Hz), 127.38, 127.02, 126.98 (d,  $J = 1.8$  Hz), 55.52 (d,  $J = 58.1$  Hz), 52.64, 21.66 (d,  $J = 1.0$  Hz), 21.56 (d,  $J = 0.8$  Hz).  $^{31}\text{P}$  NMR (202 MHz, Chloroform-*d*)  $\delta$  27.72. HRMS (ESI)  $m/z$ : calcd for  $\text{C}_{29}\text{H}_{28}\text{O}_3\text{P}$   $[\text{M}+\text{H}]^+$ : 455.1771; found: 455.1776.

**Methyl 2-(di-p-tolylphosphoryl)-2-(p-tolyl)acetate (3o):** White solid, m.p. 162.9-

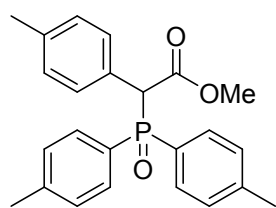

164.7 °C, 31.0 mg, Yield: 79%; <sup>1</sup>H NMR (500 MHz, Chloroform-*d*) δ 7.79 – 7.70 (m, 2H), 7.50 – 7.42 (m, 2H), 7.30 – 7.25 (m, 4H), 7.17 – 7.12 (m, 2H), 7.03 (d, *J* = 7.9 Hz, 2H), 4.64 (d, *J* = 11.6 Hz, 1H), 3.53 (s, 3H), 2.40 (s, 3H), 2.33 (s, 3H), 2.28 (s, 3H). <sup>13</sup>C NMR (126 MHz, Chloroform-*d*) δ 168.71 (d, *J* = 2.7 Hz), 142.52 (d, *J* = 2.8 Hz), 142.28 (d, *J* = 2.8 Hz), 137.60 (d, *J* = 2.5 Hz), 131.72 (d, *J* = 9.4 Hz), 131.45 (d, *J* = 9.4 Hz), 130.08 (d, *J* = 5.2 Hz), 129.13 (d, *J* = 12.6 Hz), 129.06 (d, *J* = 1.8 Hz), 129.00 (d, *J* = 12.8 Hz), 128.14 (d, *J* = 40.8 Hz), 127.33 (d, *J* = 6.4 Hz), 127.32 (d, *J* = 38.6 Hz), 55.41 (d, *J* = 59.0 Hz), 52.55, 21.64 (d, *J* = 1.4 Hz), 21.55 (d, *J* = 1.4 Hz), 21.10. <sup>31</sup>P NMR (202 MHz, Chloroform-*d*) δ 27.55. HRMS (ESI) *m/z*: calcd for C<sub>24</sub>H<sub>26</sub>O<sub>3</sub>P [M+H]<sup>+</sup>: 393.1614; found: 393.1620.

**Methyl 2-(diphenylphosphoryl)-2-(p-tolyl)acetate (3p):** White solid, m.p. 192.5-

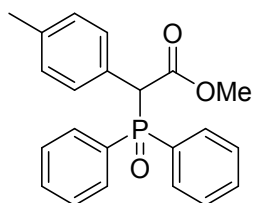

194.0 °C, 28.8 mg, Yield: 79%; <sup>1</sup>H NMR (500 MHz, Chloroform-*d*) δ 7.93 – 7.86 (m, 2H), 7.62 – 7.30 (m, 8H), 7.28 – 7.25 (m, 2H), 7.03 (d, *J* = 7.9 Hz, 2H), 4.68 (d, *J* = 11.5 Hz, 1H), 3.52 (s, 3H), 2.26 (s, 3H). <sup>13</sup>C NMR (126 MHz, Chloroform-*d*) δ 168.51 (d, *J* = 2.8 Hz), 137.74 (d, *J* = 2.5 Hz), 132.13 (d, *J* = 2.8 Hz), 131.89 (d, *J* = 2.7 Hz), 131.72 (d, *J* = 9.1 Hz), 131.43 (d, *J* = 9.0 Hz), 131.28 (d, *J* = 32.5 Hz), 130.47 (d, *J* = 30.6 Hz), 130.07 (d, *J* = 5.1 Hz), 129.10 (d, *J* = 1.8 Hz), 128.42 (d, *J* = 12.0 Hz), 128.28 (d, *J* = 12.1 Hz), 127.06 (d, *J* = 6.5 Hz), 55.23 (d, *J* = 59.1 Hz), 52.58, 21.10. <sup>31</sup>P NMR (202 MHz, Chloroform-*d*) δ 27.12. HRMS (ESI) *m/z*: calcd for C<sub>22</sub>H<sub>22</sub>O<sub>3</sub>P [M+H]<sup>+</sup>: 365.1301; found: 365.1310.

**Methyl 2-(di-p-tolylphosphoryl)-2-(3-methoxyphenyl)acetate (3q):** White solid,

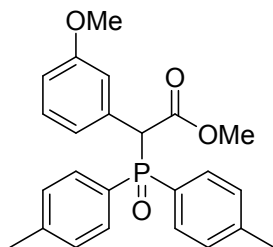

m.p. 167.3-169.3 °C, 23.7 mg, Yield: 58%; <sup>1</sup>H NMR (500 MHz, Chloroform-*d*) δ 7.78 – 7.72 (m, 2H), 7.49 – 7.43 (m, 2H), 7.30 – 7.26 (m, 2H), 7.18 – 7.08 (m, 3H), 6.99 – 6.97 (m, 1H), 6.94 – 6.75 (m, 2H), 4.65 (d, *J* = 11.9 Hz, 1H), 3.68 (s, 3H), 3.55 (s, 3H), 2.40 (s, 3H), 2.32 (s, 3H). <sup>13</sup>C NMR (126 MHz, Chloroform-*d*) δ 168.49 (d, *J* = 2.8 Hz), 159.30 (d, *J* = 1.9 Hz), 142.60 (d, *J* = 2.8 Hz), 142.36 (d, *J* = 2.8 Hz), 131.83 (d, *J* = 5.3 Hz), 131.77 (d, *J* = 9.3 Hz), 131.48 (d, *J* = 9.5 Hz), 129.13 (d, *J* = 12.4 Hz), 129.13 (d, *J* = 1.7 Hz), 128.98 (d, *J* = 12.5 Hz), 127.98 (d, *J* = 49.4 Hz), 127.15 (d, *J* = 47.6 Hz), 122.67 (d, *J* = 5.3 Hz), 115.13 (d, *J* = 4.9 Hz), 114.28 (d, *J* = 2.2 Hz), 55.78 (d, *J* = 58.4 Hz), 55.15, 52.59, 21.62 (d,

$J = 0.7$  Hz), 21.53(d,  $J = 0.7$  Hz).  $^{31}\text{P}$  NMR (202 MHz, Chloroform- $d$ )  $\delta$  27.74. HRMS (ESI)  $m/z$ : calcd for  $\text{C}_{24}\text{H}_{26}\text{O}_4\text{P}$   $[\text{M}+\text{H}]^+$ : 409.1563; found: 409.1570.

**Methyl 2-(di-*p*-tolylphosphoryl)-2-(2-methoxyphenyl)acetate (3r):** colorless oil,

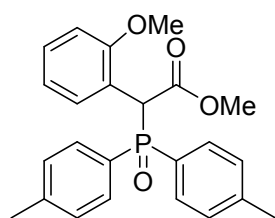

37.1 mg, Yield: 91%;  $^1\text{H}$  NMR (500 MHz, Chloroform- $d$ )  $\delta$  8.00 – 7.96 (m, 1H), 7.85 – 7.76 (m, 2H), 7.49 – 7.37 (m, 2H), 7.34 – 7.25 (m, 2H), 7.17 – 7.13 (m, 1H), 7.07 – 7.03 (m, 2H), 6.94 – 6.91 (m, 1H), 6.64 (d,  $J = 8.2$  Hz, 1H), 5.46 (d,  $J = 10.8$  Hz, 1H), 3.55 (s, 3H), 3.51 (s, 3H), 2.38 (s, 3H), 2.25 (s, 3H).

$^{13}\text{C}$  NMR (126 MHz, Chloroform- $d$ )  $\delta$  168.39 (d,  $J = 3.7$  Hz), 156.06 (d,  $J = 5.6$  Hz), 142.20 (d,  $J = 2.9$  Hz), 141.80 (d,  $J = 2.9$  Hz), 131.84 (d,  $J = 4.5$  Hz), 131.34 (d,  $J = 9.5$  Hz), 131.05 (d,  $J = 9.6$  Hz), 129.07 (d,  $J = 12.3$  Hz), 128.92 (d,  $J = 2.1$  Hz), 128.89 (d,  $J = 40.2$  Hz), 128.52 (d,  $J = 12.6$  Hz), 128.07 (d,  $J = 44.4$  Hz), 120.62 (d,  $J = 2.0$  Hz), 119.09 (d,  $J = 5.8$  Hz), 109.99 (d,  $J = 1.4$  Hz), 55.23, 52.40, 45.40 (d,  $J = 60.5$  Hz), 21.55 (d,  $J = 0.8$  Hz), 21.39 (d,  $J = 0.8$  Hz).  $^{31}\text{P}$  NMR (202 MHz, Chloroform- $d$ )  $\delta$  28.68. HRMS (ESI)  $m/z$ : calcd for  $\text{C}_{24}\text{H}_{26}\text{O}_4\text{P}$   $[\text{M}+\text{H}]^+$ : 409.1563; found: 409.1570.

**Methyl 2-(di-*p*-tolylphosphoryl)-2-(4-fluorophenyl)acetate (3s):** White solid, m.p.

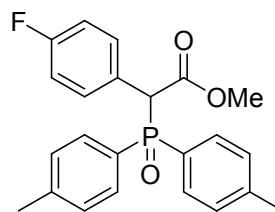

142.5-144.1 °C, 36.0 mg, Yield: 91%;  $^1\text{H}$  NMR (500 MHz, Chloroform- $d$ )  $\delta$  7.81 – 7.73 (m, 2H), 7.49 – 7.42 (m, 2H), 7.41 – 7.37 (m, 2H), 7.31 – 7.28 (m, 2H), 7.16 – 7.13 (m, 2H), 6.91 (t,  $J = 8.5$  Hz, 2H), 4.67 (d,  $J = 11.4$  Hz, 1H), 3.53

(s, 3H), 2.40 (s, 3H), 2.32 (s, 3H).  $^{13}\text{C}$  NMR (126 MHz, Chloroform- $d$ )  $\delta$  168.37(d,  $J = 2.7$  Hz), 162.48 (dd,  $J = 247.0, 2.5$  Hz), 142.74 (d,  $J = 2.9$  Hz), 142.49 (d,  $J = 2.8$  Hz), 131.95 (d,  $J = 5.1$  Hz), 131.89 (d,  $J = 5.1$  Hz), 131.65 (d,  $J = 9.5$  Hz), 131.28 (d,  $J = 9.5$  Hz), 129.21 (d,  $J = 12.8$  Hz), 129.10 (d,  $J = 12.5$  Hz), 127.59 (d,  $J = 105.2$  Hz), 127.19 (d,  $J = 103.1$  Hz), 126.36 – 126.24 (m), 115.30 (d,  $J = 1.5$  Hz), 115.13 (d,  $J = 1.5$  Hz), 54.78 (d,  $J = 57.9$  Hz), 52.60, 21.62, 21.52.  $^{31}\text{P}$  NMR (202 MHz, Chloroform- $d$ )  $\delta$  27.75.  $^{19}\text{F}$  NMR (471 MHz,  $\text{CDCl}_3$ )  $\delta$  -114.31, -114.32. HRMS (ESI)  $m/z$ : calcd for  $\text{C}_{23}\text{H}_{23}\text{FO}_3\text{P}$   $[\text{M}+\text{H}]^+$ : 397.1363; found: 397.1369.

**Methyl 2-(4-chlorophenyl)-2-(di-*p*-tolylphosphoryl)acetate (3t):** colorless oil, 29.7

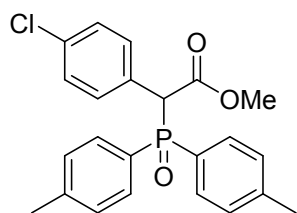

mg, Yield: 72%;  $^1\text{H}$  NMR (500 MHz, Chloroform- $d$ )  $\delta$  7.78 – 7.71 (m, 2H), 7.49 – 7.41 (m, 2H), 7.36 – 7.32 (m, 2H), 7.31 – 7.27 (m, 2H), 7.21 – 7.17 (m, 2H), 7.16 – 7.14 (m, 2H), 4.64 (d,  $J = 11.6$  Hz, 1H), 3.52 (s, 3H), 2.40 (s, 3H), 2.33 (s, 3H).  $^{13}\text{C}$  NMR (126 MHz, Chloroform- $d$ )  $\delta$  168.19

(d,  $J = 3.0$  Hz), 142.80 (d,  $J = 2.8$  Hz), 142.59 (d,  $J = 2.8$  Hz), 133.98 (d,  $J = 2.8$  Hz), 131.66 (d,  $J = 9.5$  Hz), 131.54 (d,  $J = 5.1$  Hz), 131.30 (d,  $J = 9.5$  Hz), 129.23 (d,  $J = 12.5$  Hz), 129.16 (d,  $J = 12.5$  Hz), 129.07 (d,  $J = 6.4$  Hz), 128.45 (d,  $J = 1.8$  Hz), 127.69 (d,  $J = 49.5$  Hz), 126.86 (d,  $J = 47.7$  Hz), 55.08 (d,  $J = 57.3$  Hz), 52.67, 21.65 (d,  $J = 1.0$  Hz), 21.55 (d,  $J = 1.0$  Hz).  $^{31}\text{P}$  NMR (202 MHz, Chloroform-*d*)  $\delta$  27.63. HRMS (ESI)  $m/z$ : calcd for  $\text{C}_{23}\text{H}_{23}\text{ClO}_3\text{P}$   $[\text{M}+\text{H}]^+$ : 413.1068; found: 413.1071.

**Methyl 2-(4-bromophenyl)-2-(di-*p*-tolylphosphoryl)acetate (3u):** White solid, m.p.

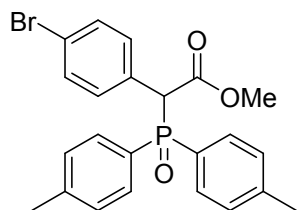

163.7-165.6 °C, 30.1 mg, Yield: 66%;  $^1\text{H}$  NMR (500 MHz, Chloroform-*d*)  $\delta$  7.78 – 7.71 (m, 2H), 7.49 – 7.42 (m, 2H), 7.38 – 7.32 (m, 2H), 7.31 – 7.27 (m, 4H), 7.18 – 7.14 (m, 2H), 4.62 (d,  $J = 11.6$  Hz, 1H), 3.53 (s, 3H), 2.41 (s, 3H), 2.34 (s, 3H).  $^{13}\text{C}$  NMR (126 MHz, Chloroform-*d*)  $\delta$  168.25 (d,  $J = 3.0$  Hz), 142.93 (d,  $J = 2.9$  Hz), 142.73 (d,  $J = 2.8$  Hz), 131.99 (d,  $J = 5.1$  Hz), 131.80 (d,  $J = 9.5$  Hz), 131.54 (d,  $J = 1.7$  Hz), 131.44 (d,  $J = 9.5$  Hz), 129.74 (d,  $J = 6.4$  Hz), 129.38 (d,  $J = 8.2$  Hz), 129.28 (d,  $J = 8.3$  Hz), 127.60 (d,  $J = 105.1$  Hz), 127.20 (d,  $J = 103.4$  Hz), 122.36 (d,  $J = 3.0$  Hz), 55.33 (d,  $J = 57.1$  Hz), 52.81, 21.78 (d,  $J = 0.7$  Hz), 21.69 (d,  $J = 1.3$  Hz).  $^{31}\text{P}$  NMR (202 MHz, Chloroform-*d*)  $\delta$  27.40. HRMS (ESI)  $m/z$ : calcd for  $\text{C}_{23}\text{H}_{23}\text{BrO}_3\text{P}$   $[\text{M}+\text{H}]^+$ : 457.0563; found: 457.0566.

## 5. Copies of NMR Spectra

### Methyl 2-(diphenylphosphoryl)-2-phenylacetate (3a)

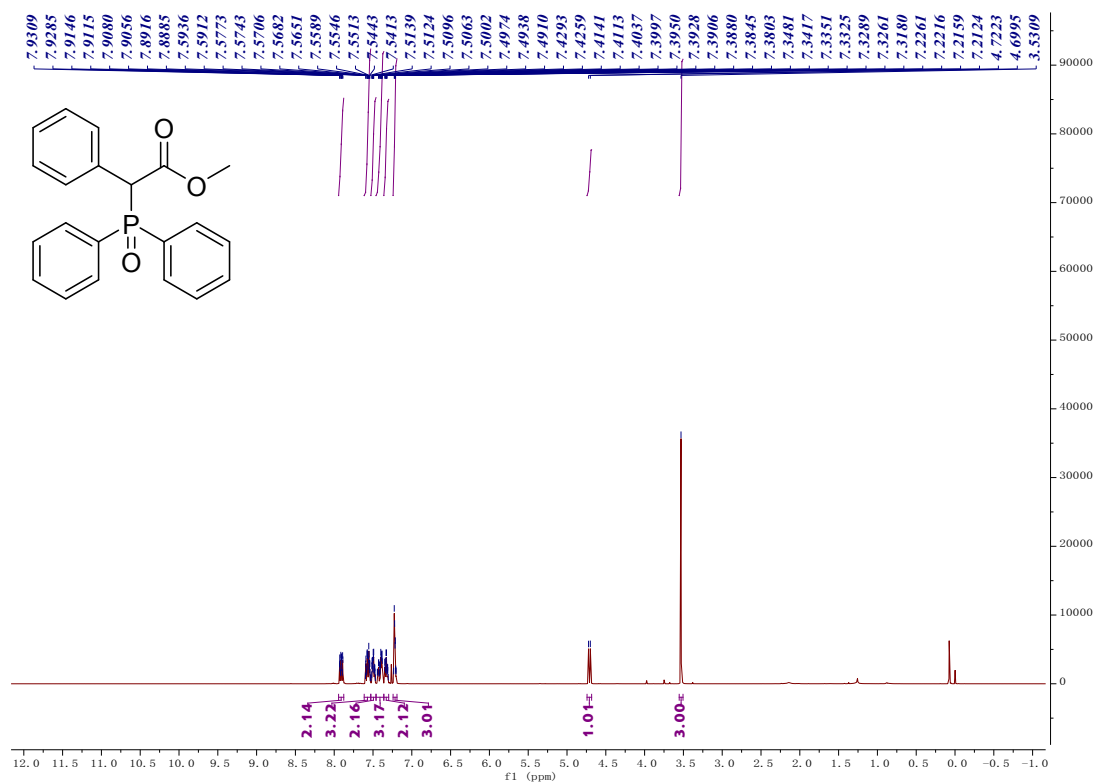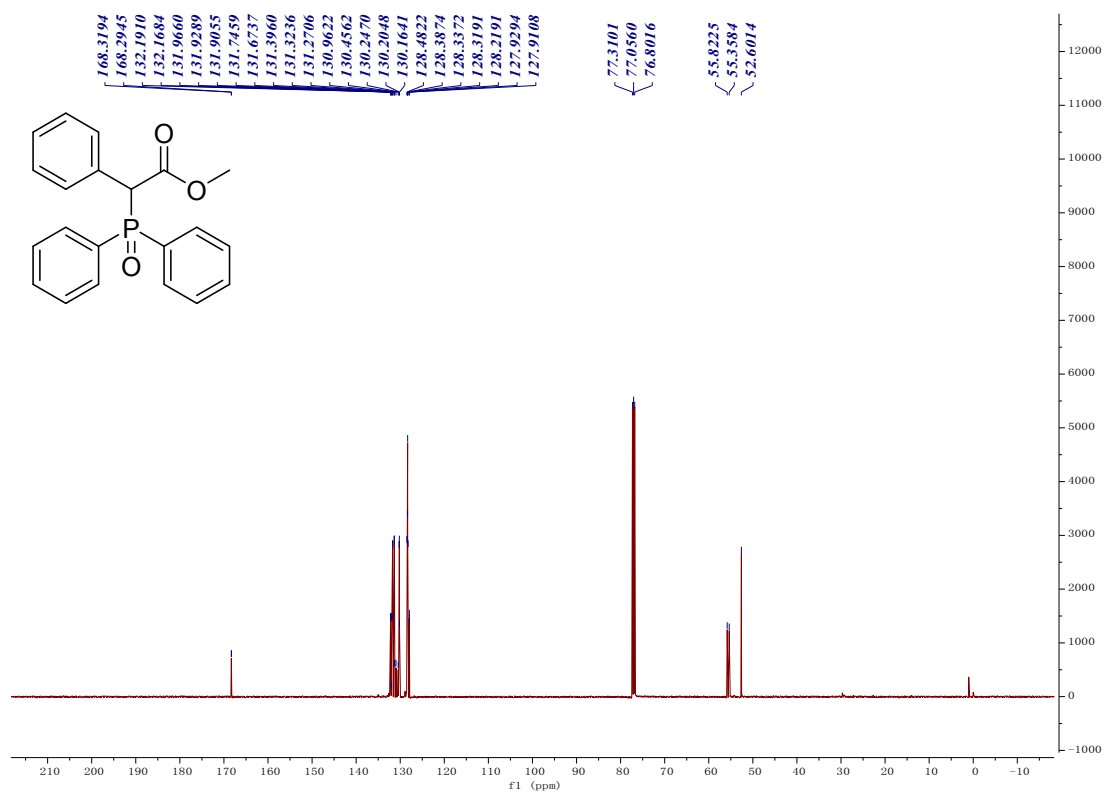

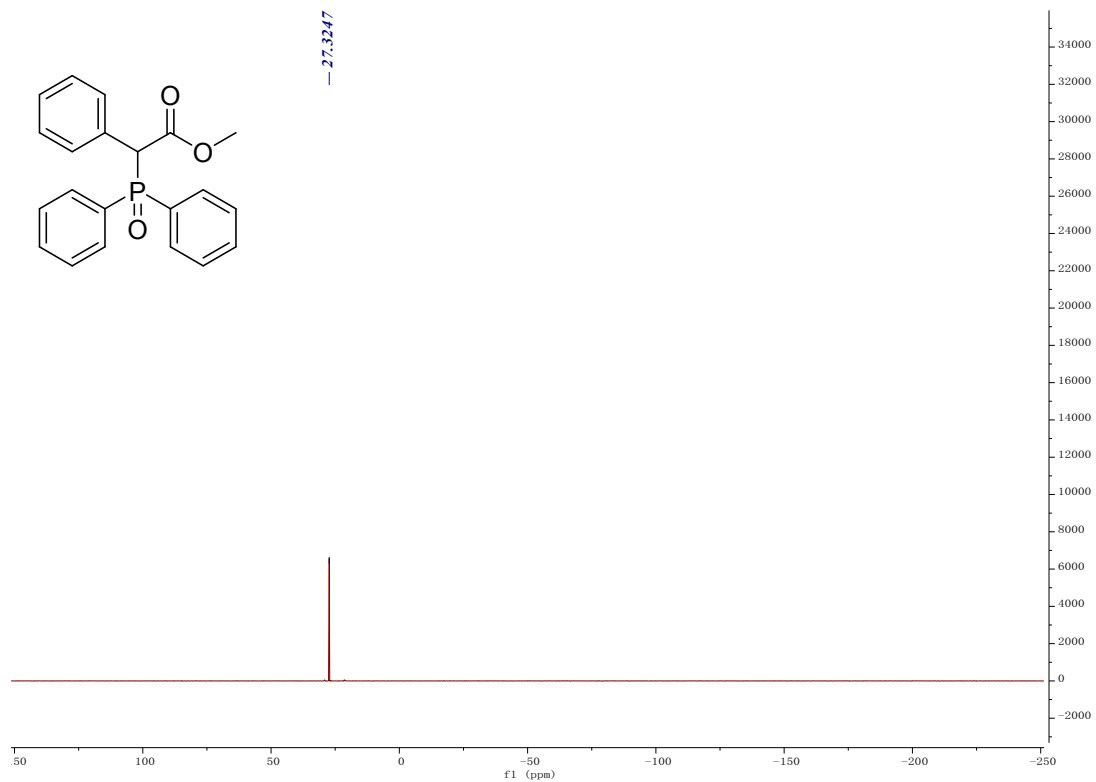

### Methyl 2-(di-p-tolylphosphoryl)-2-phenylacetate (3b)

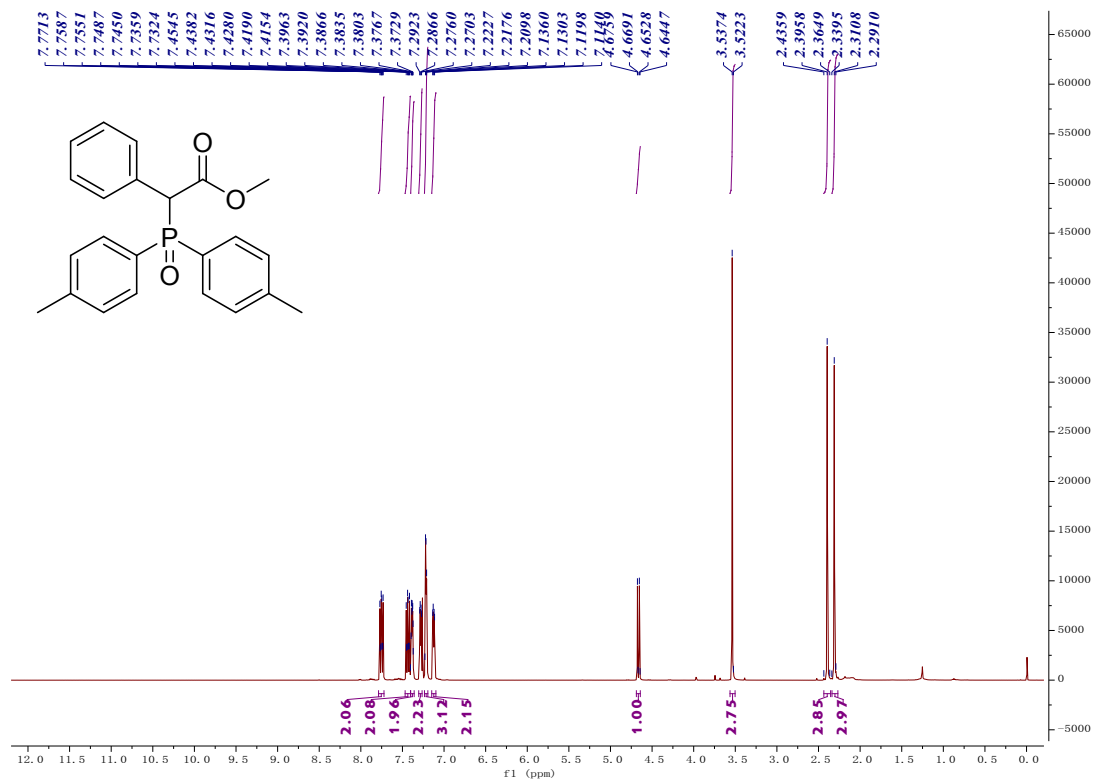

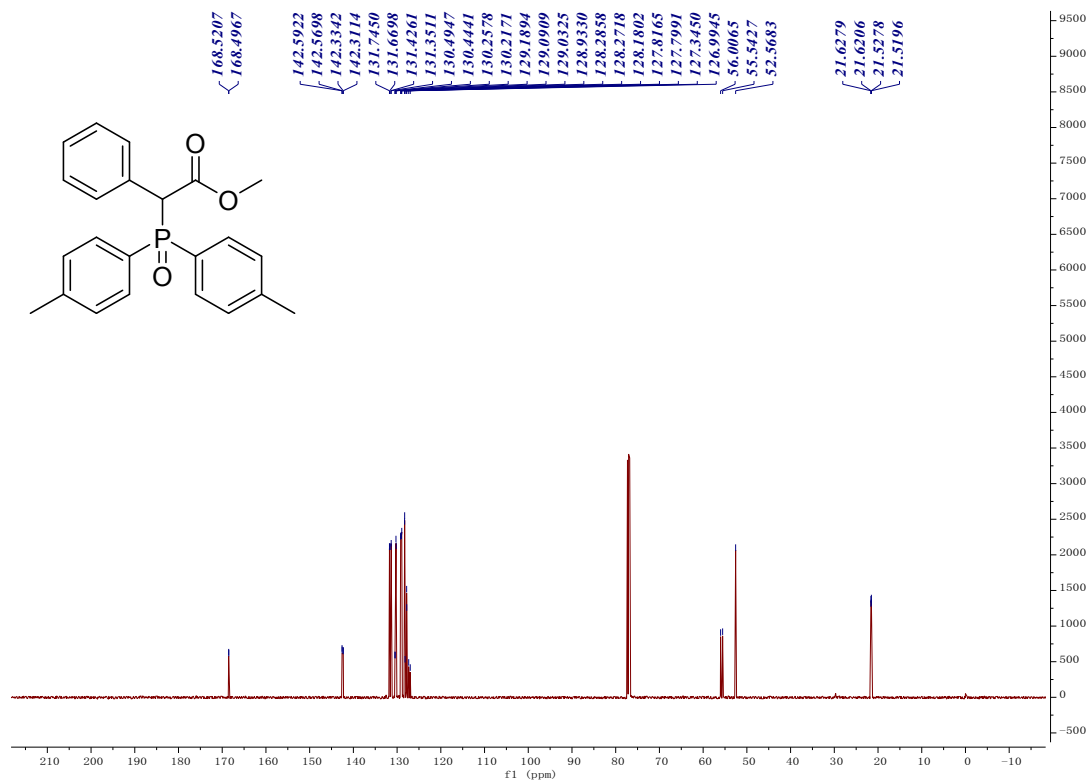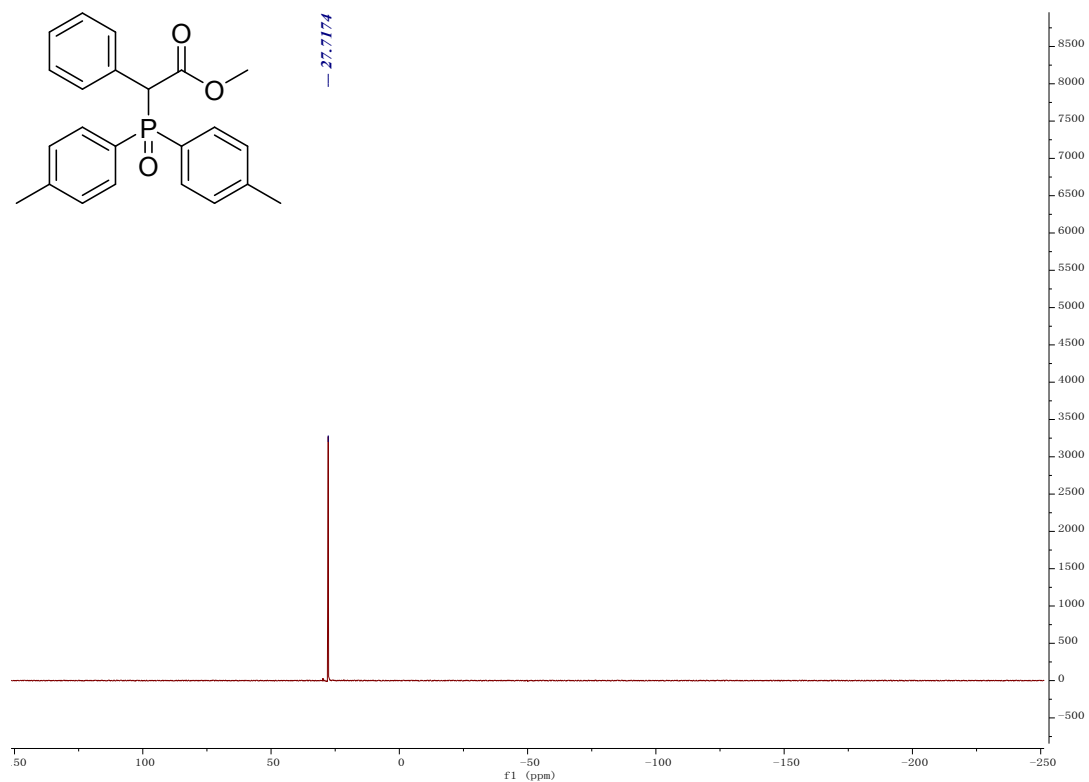

**Methyl 2-(bis(4-methoxyphenyl)phosphoryl)-2-phenylacetate (3c)**

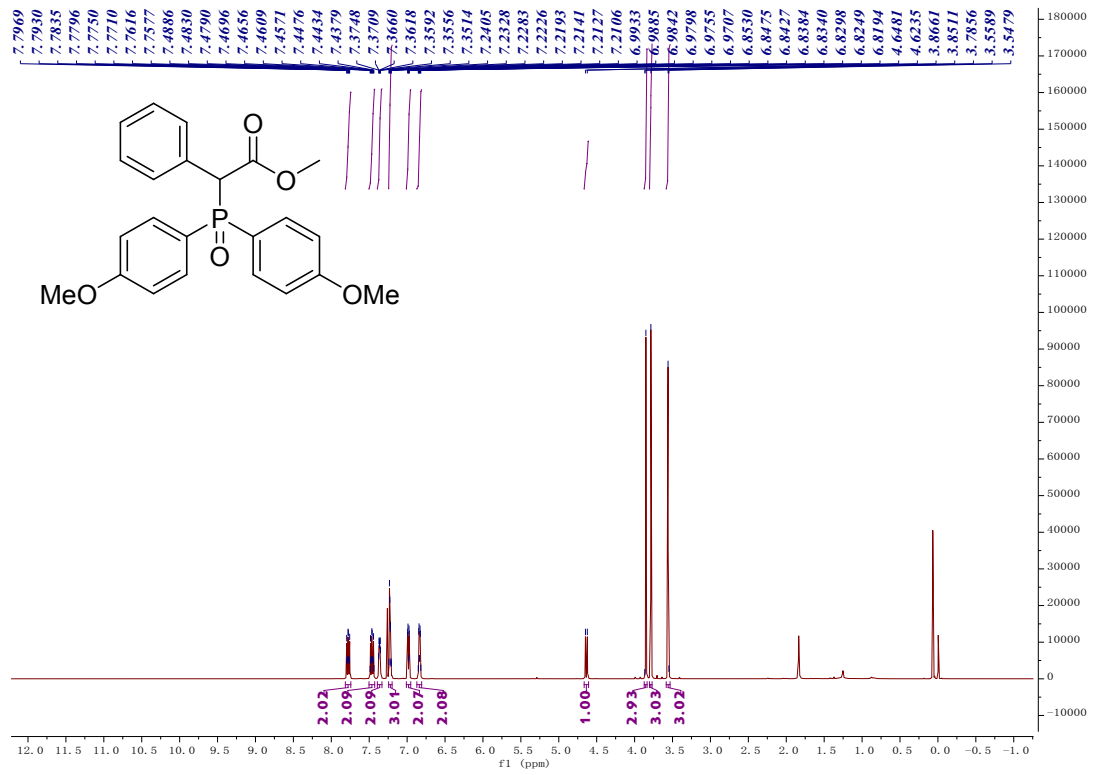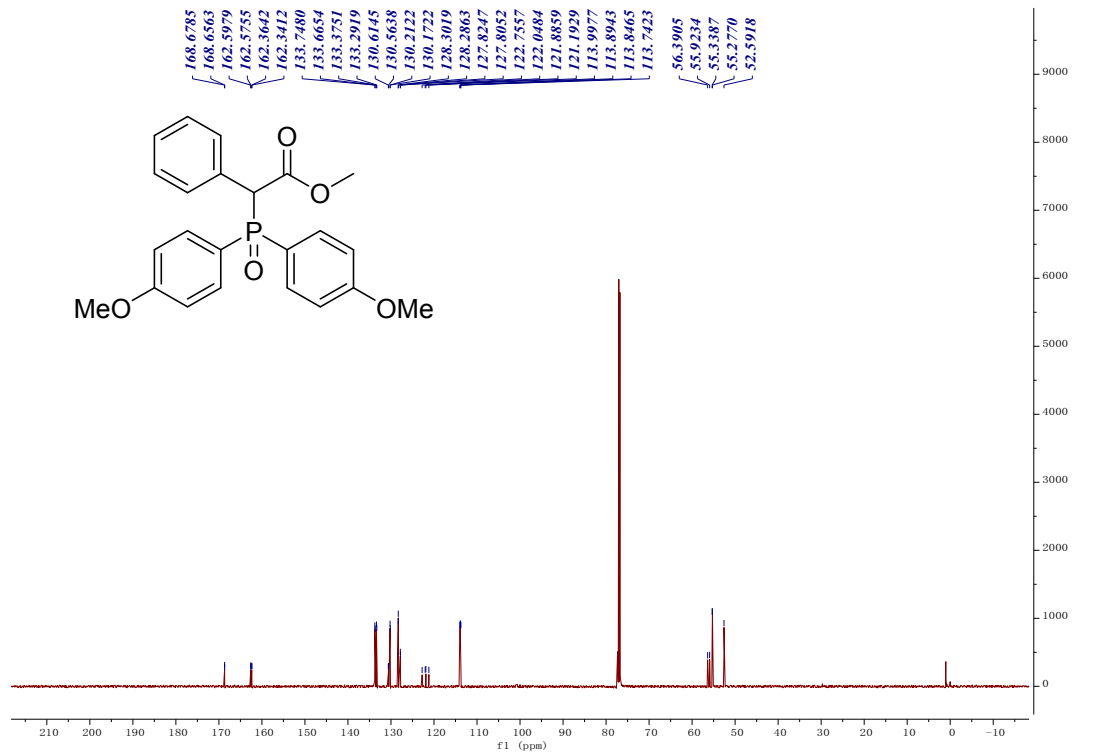



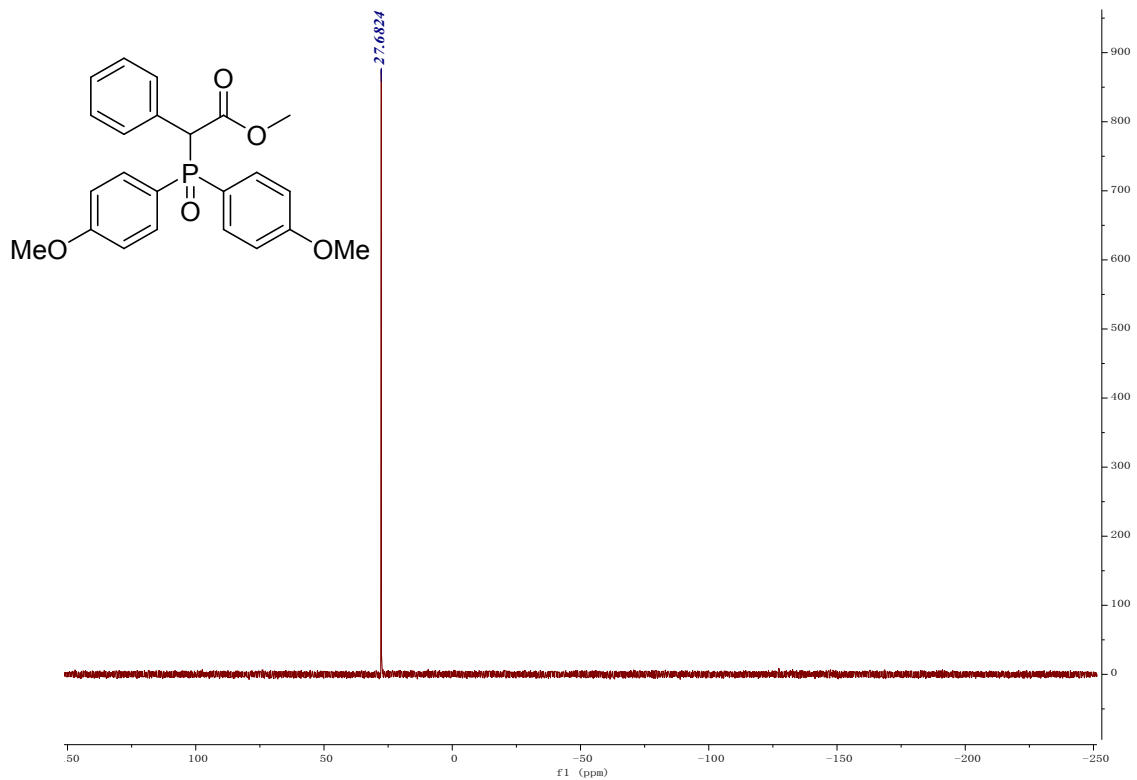

### Methyl 2-(bis(benzo[d][1,3]dioxol-4-yl)phosphoryl)-2-phenylacetate (3d)

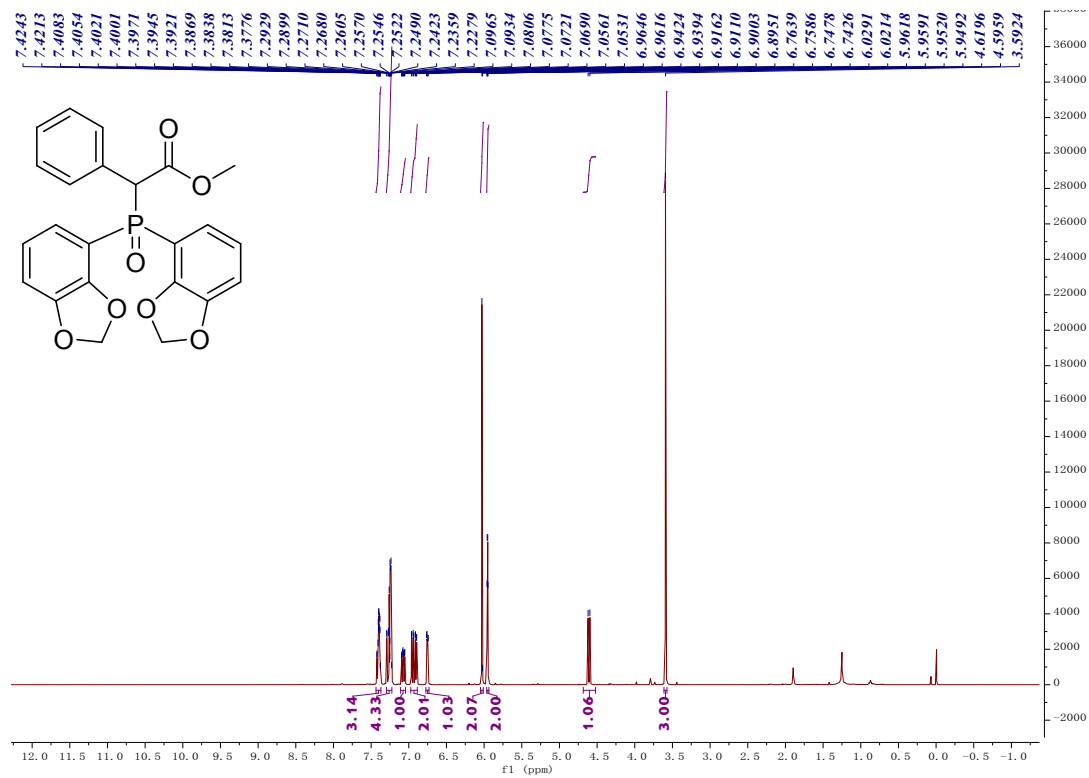

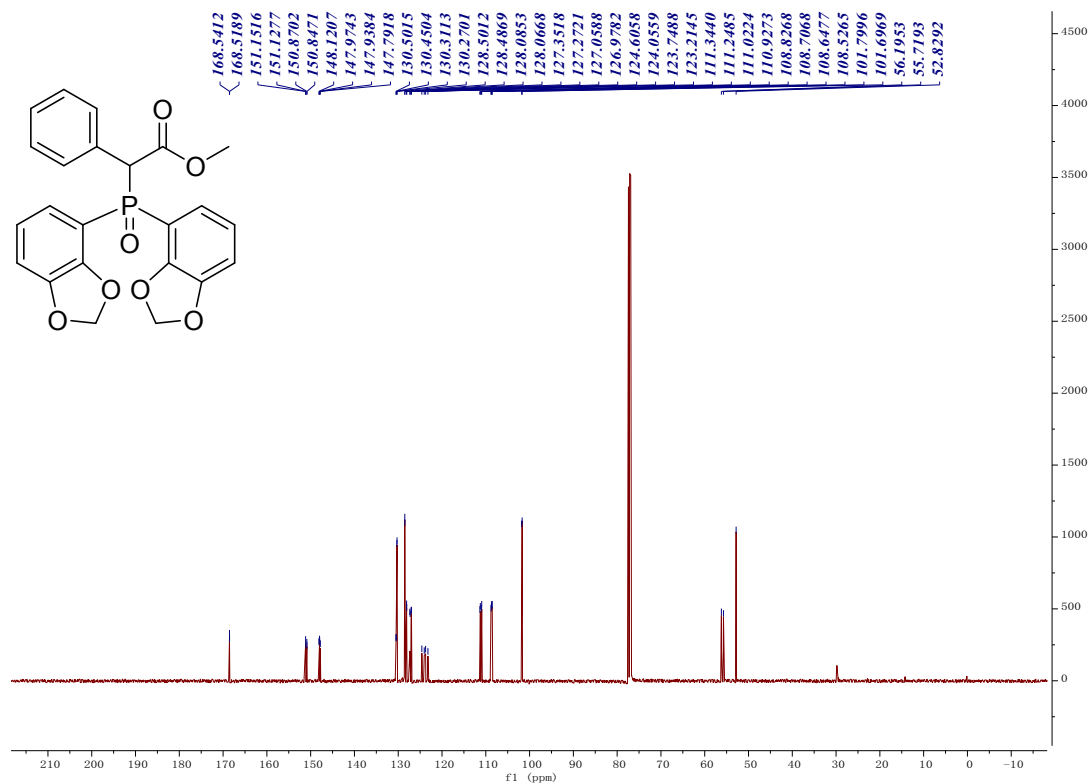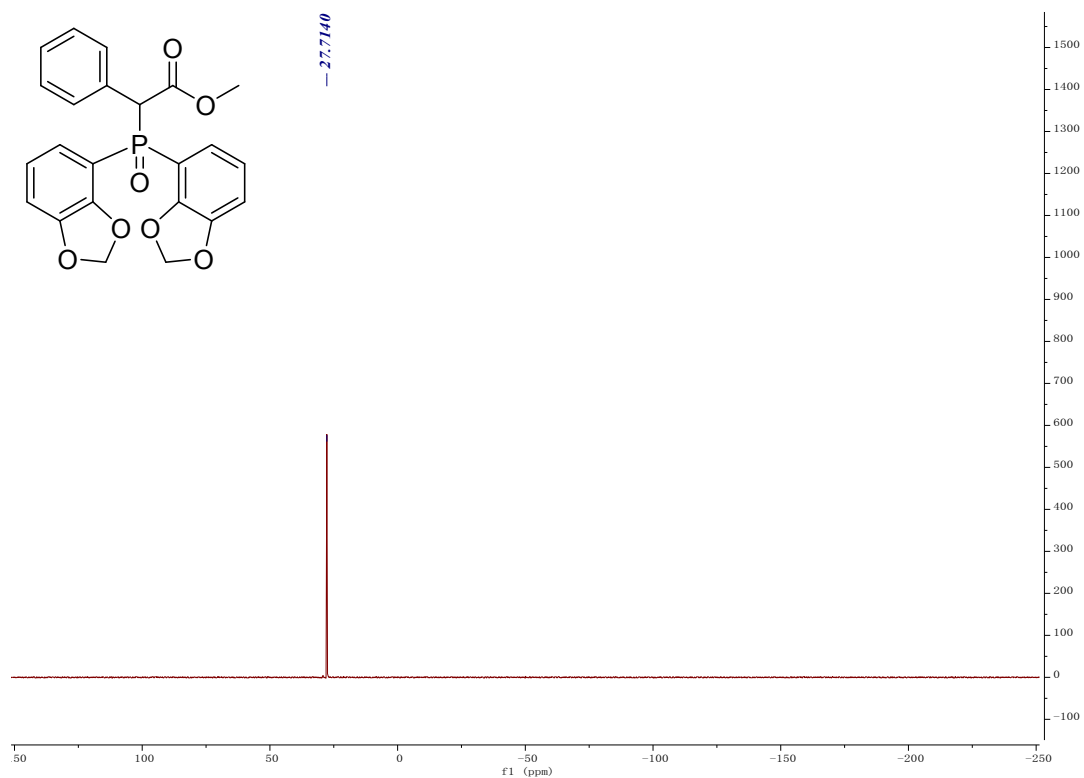

**Methyl 2-(ethoxy(phenyl)phosphoryl)-2-phenylacetate (3e)**

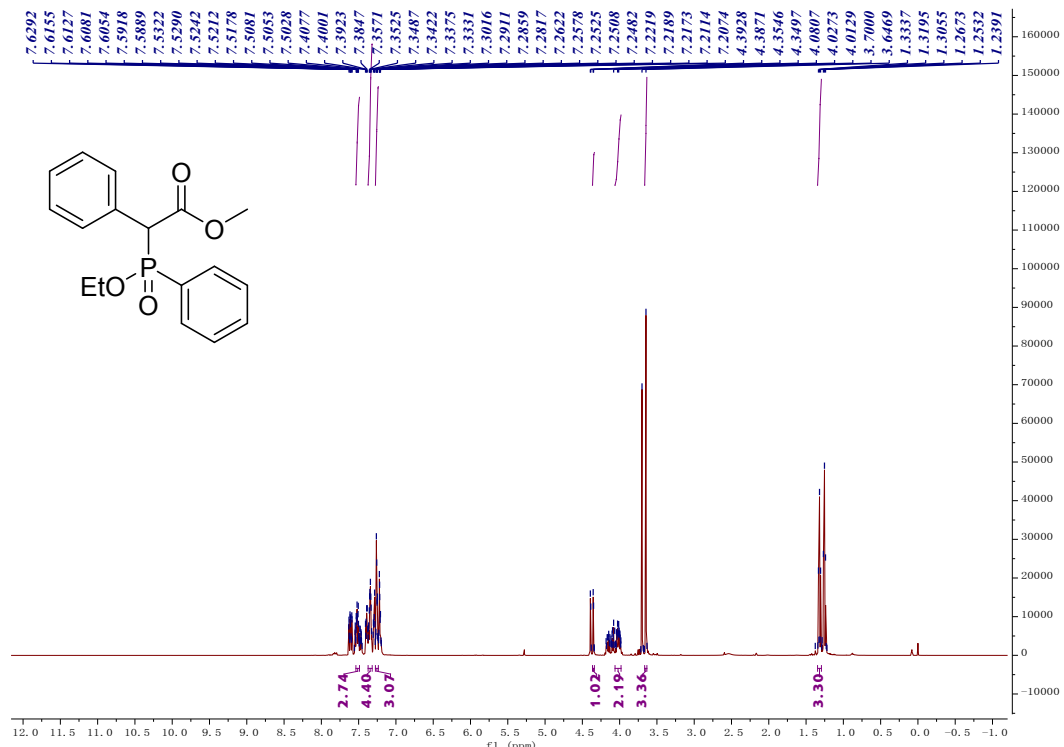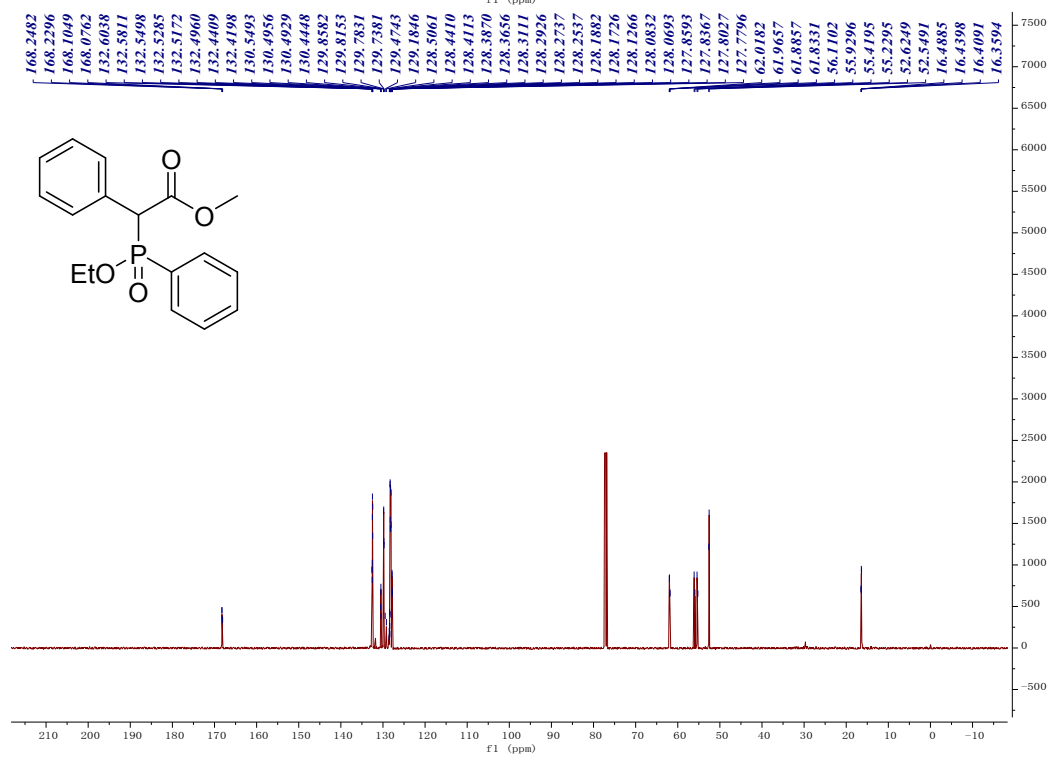

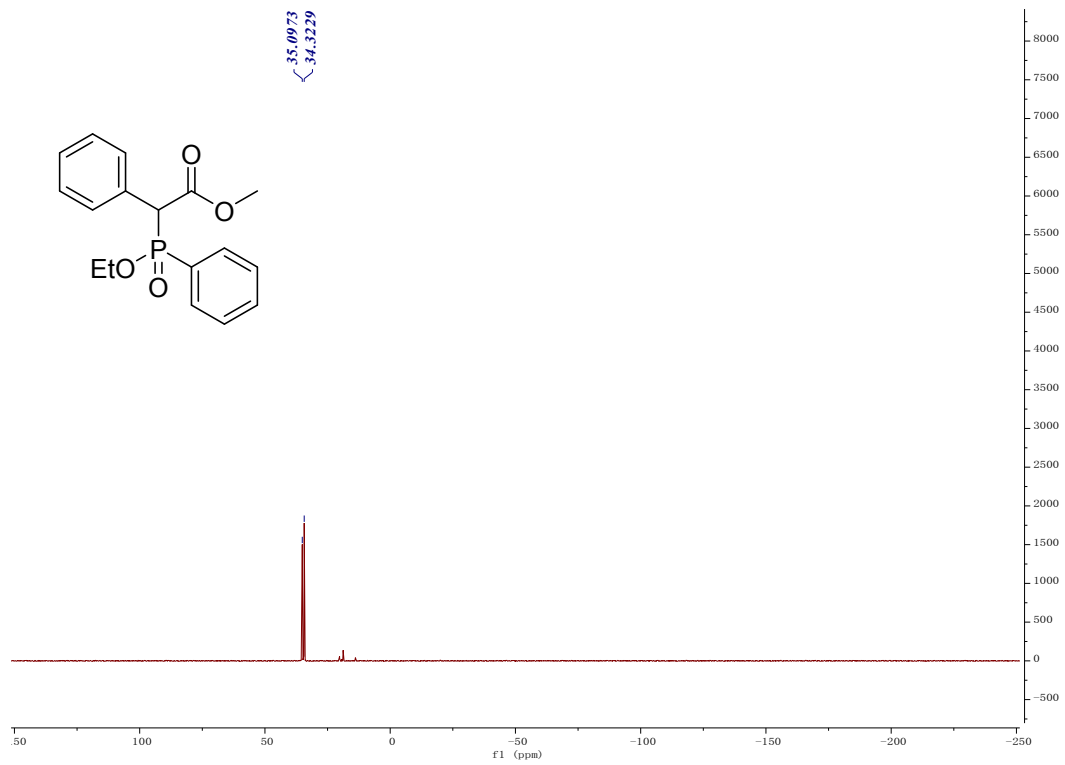

**Methyl 2-(benzyl(phenyl)phosphoryl)-2-phenylacetate (3f)**

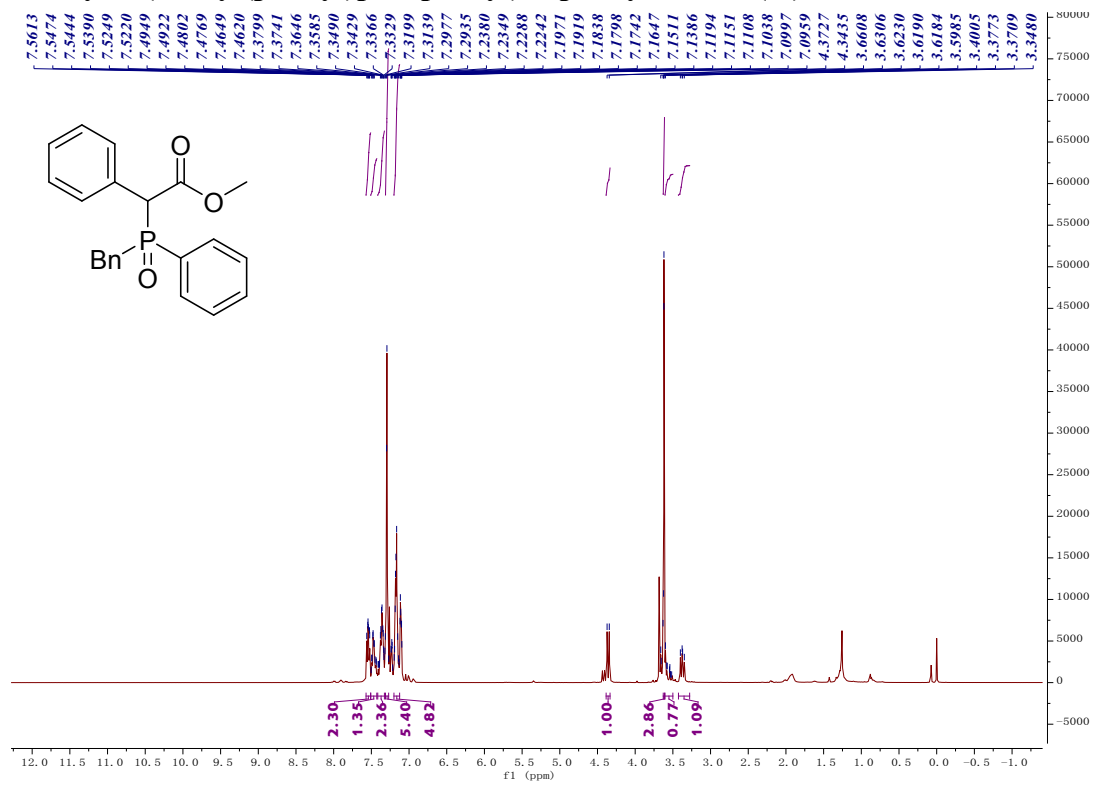

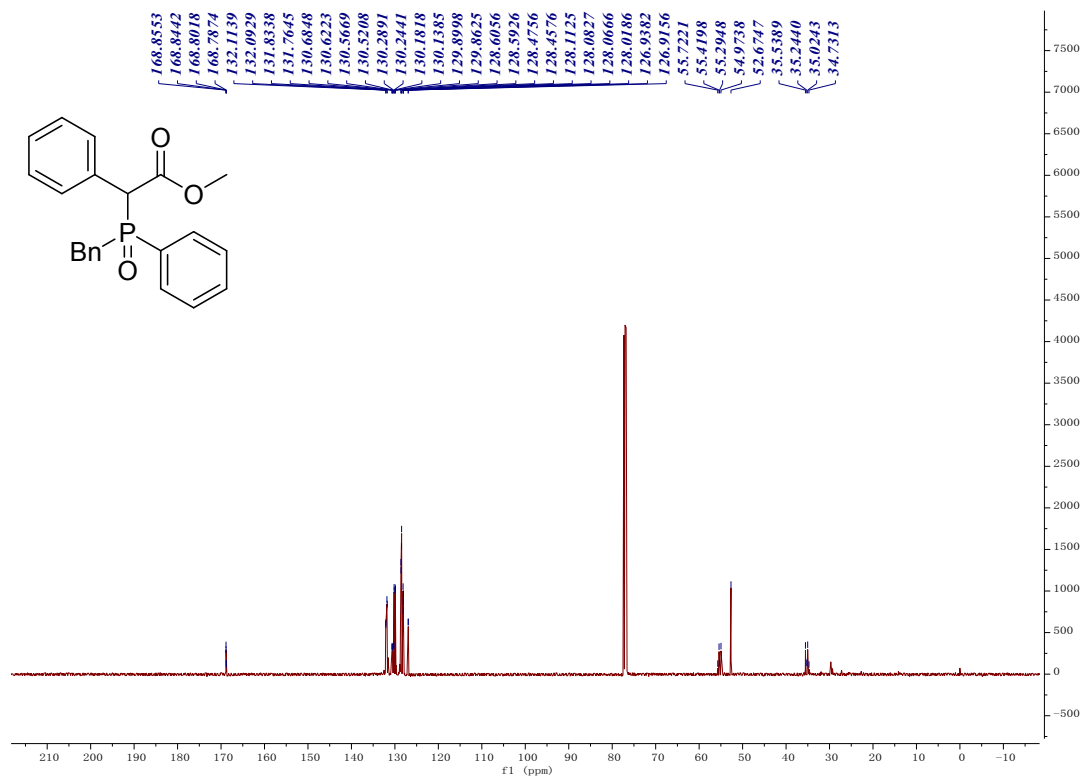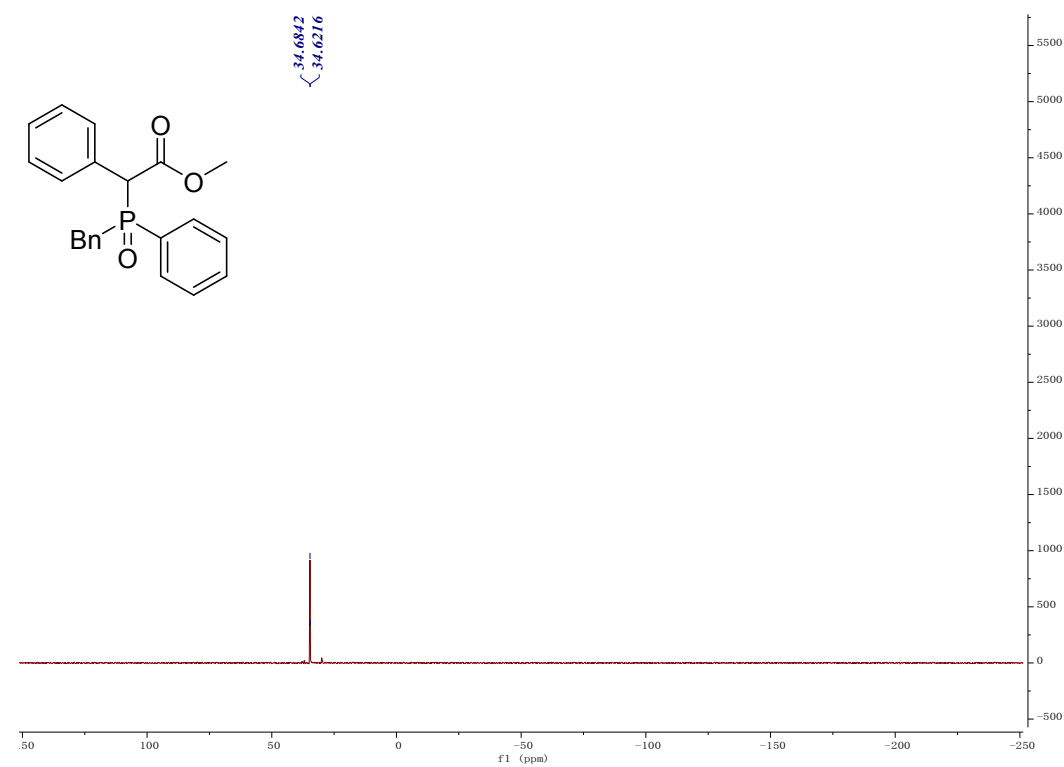

Ethyl 2-(di-*p*-tolylphosphoryl)-2-phenylacetate (3g)

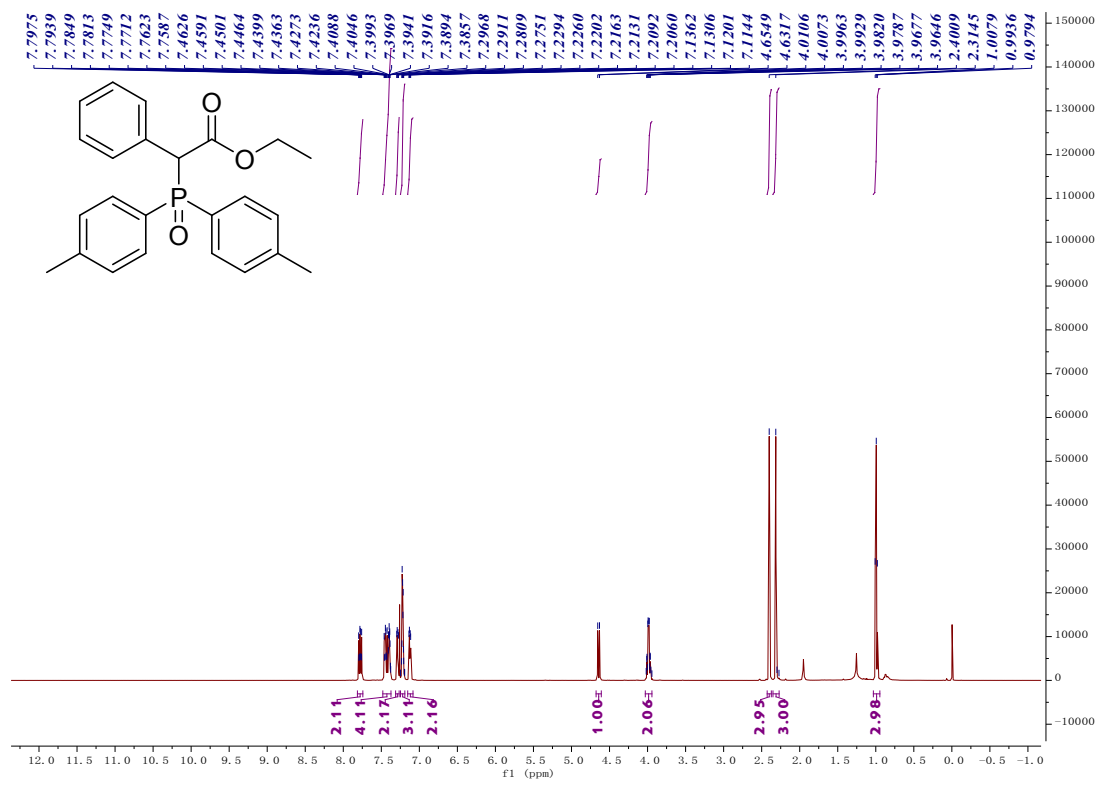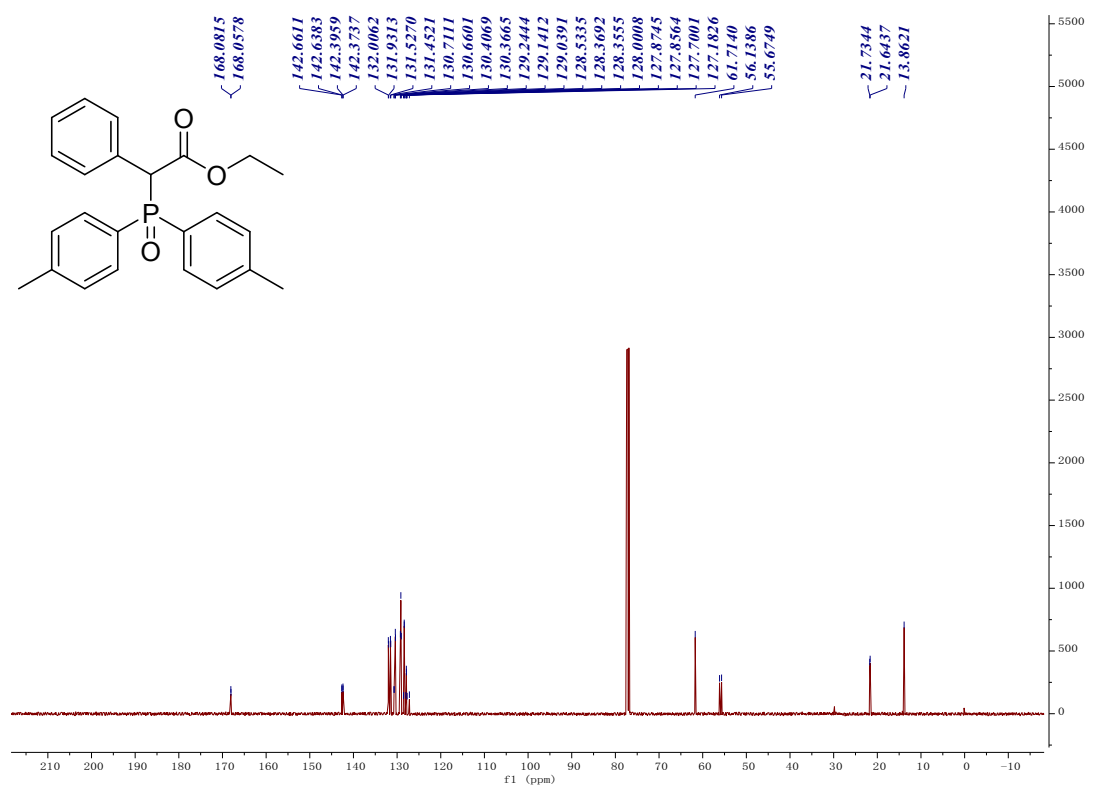

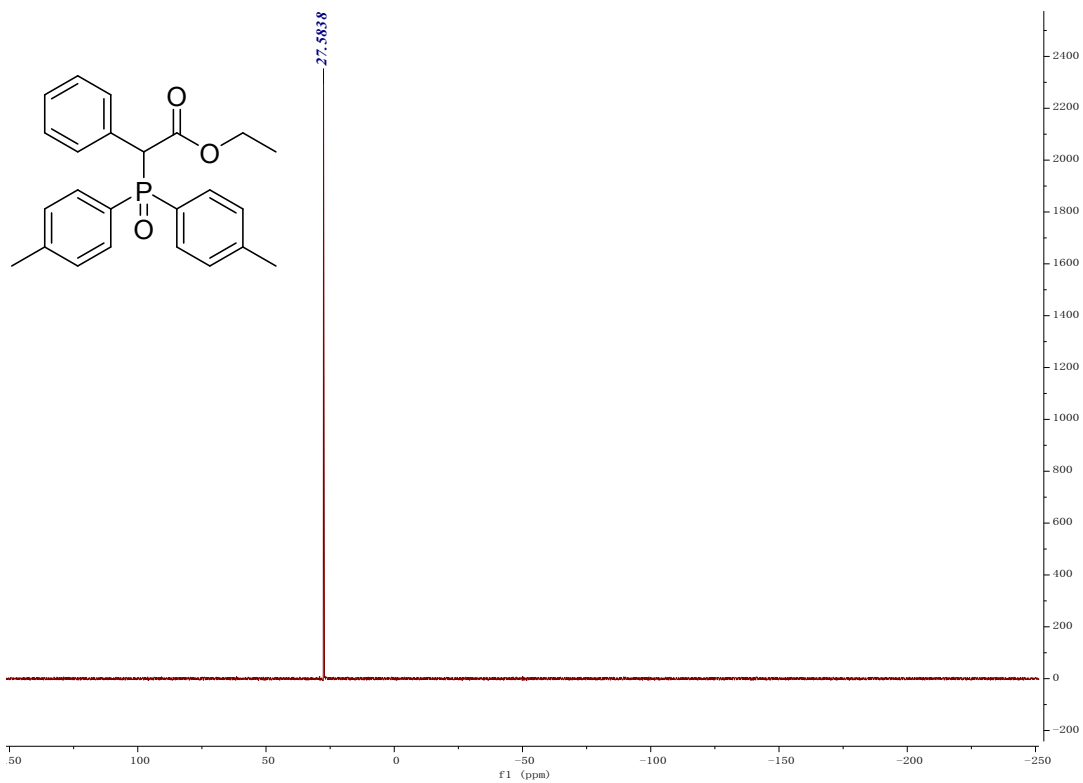

### Benzyl 2-(di-p-tolylphosphoryl)-2-phenylacetate (3h)

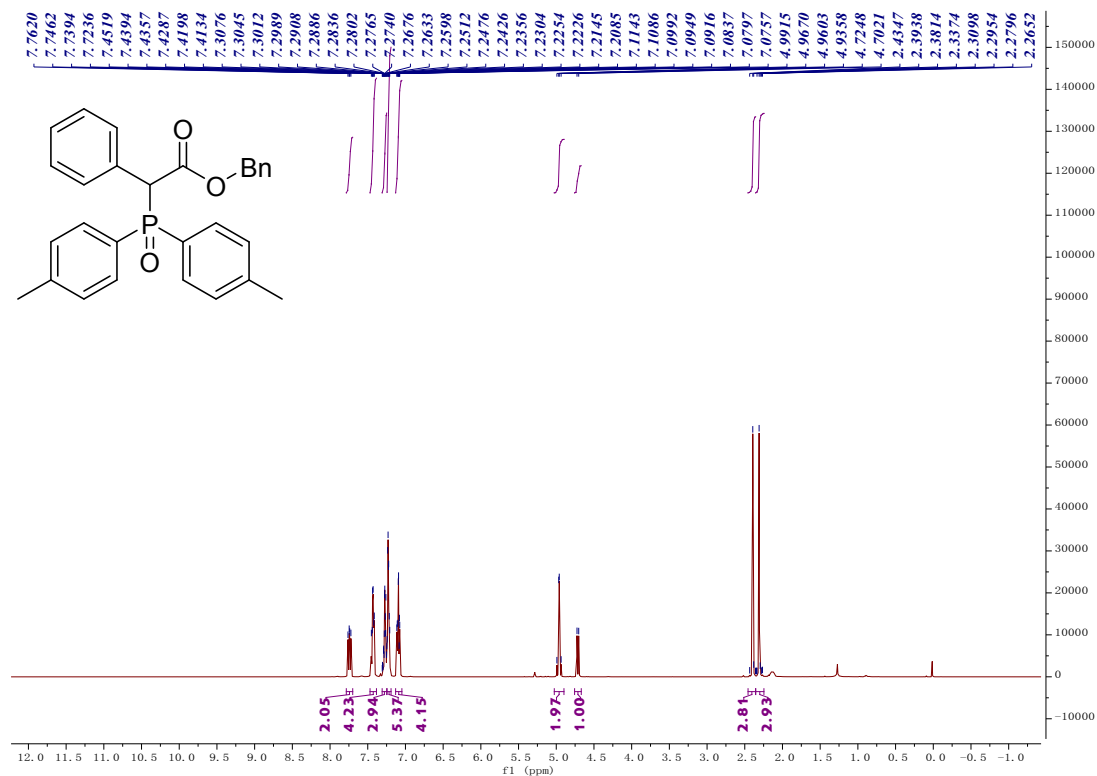

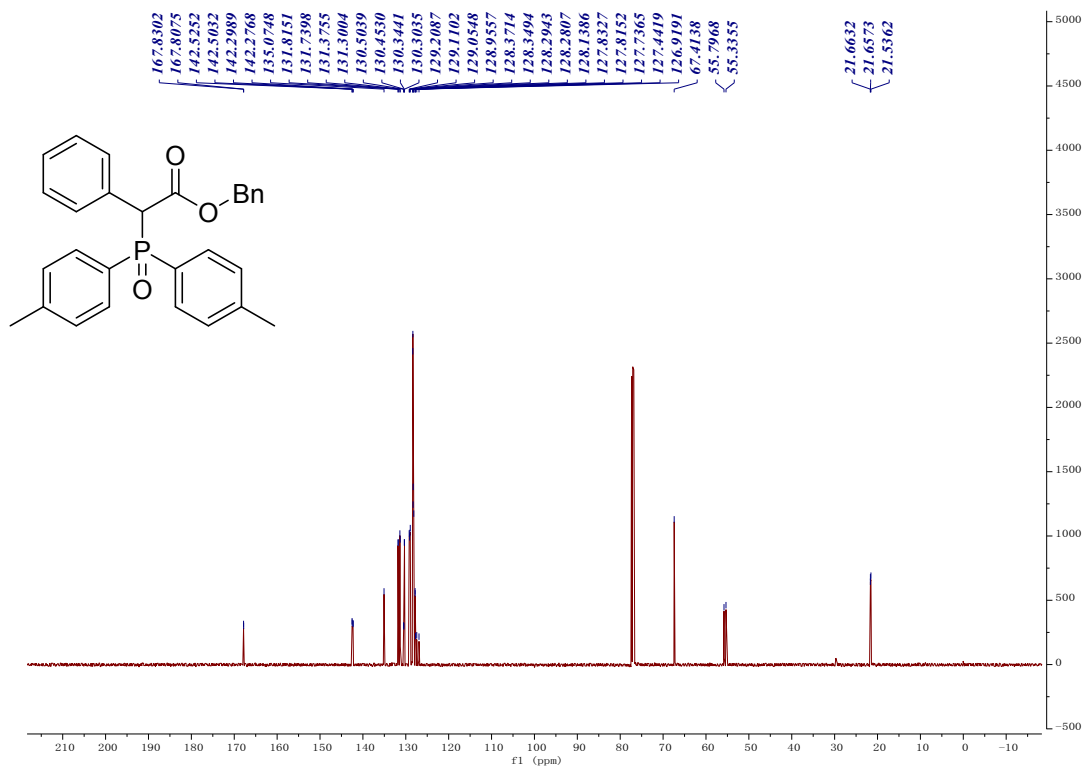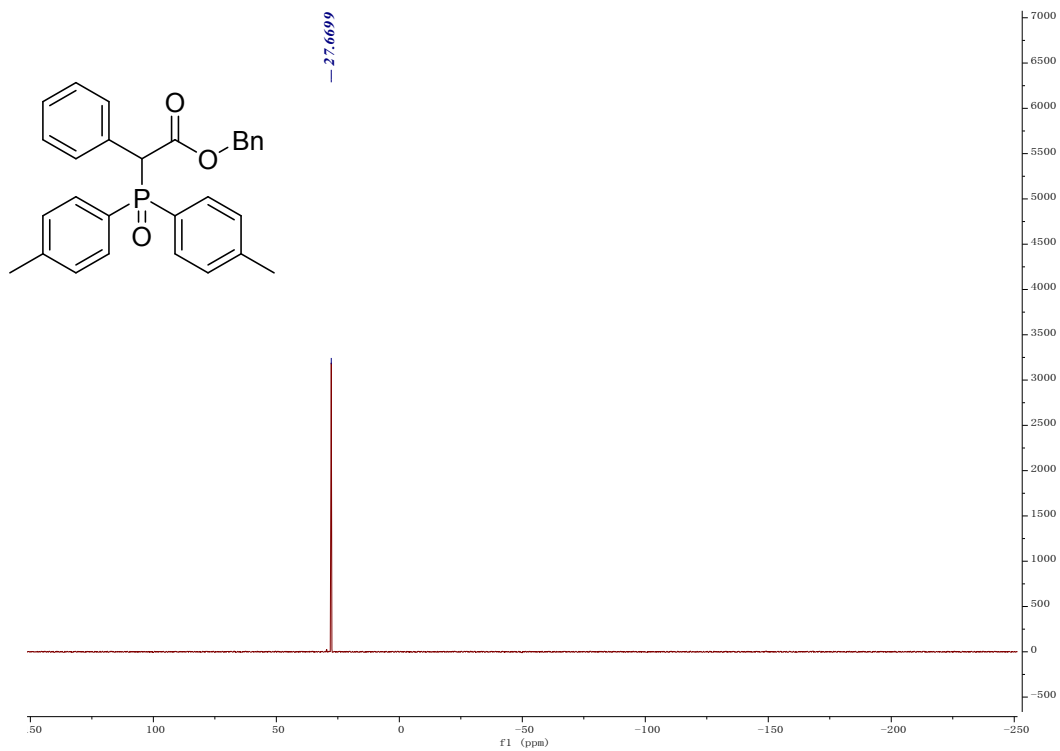

**Tert-butyl 2-(di-p-tolylphosphoryl)-2-phenylacetate (3i)**



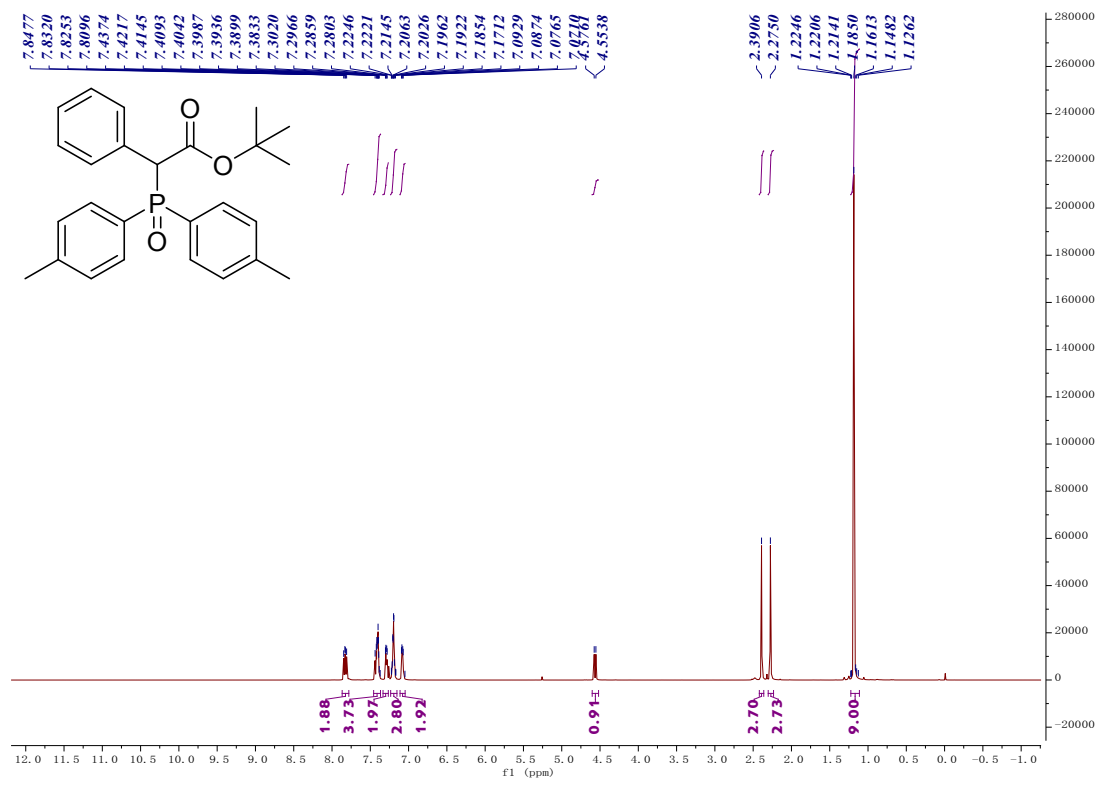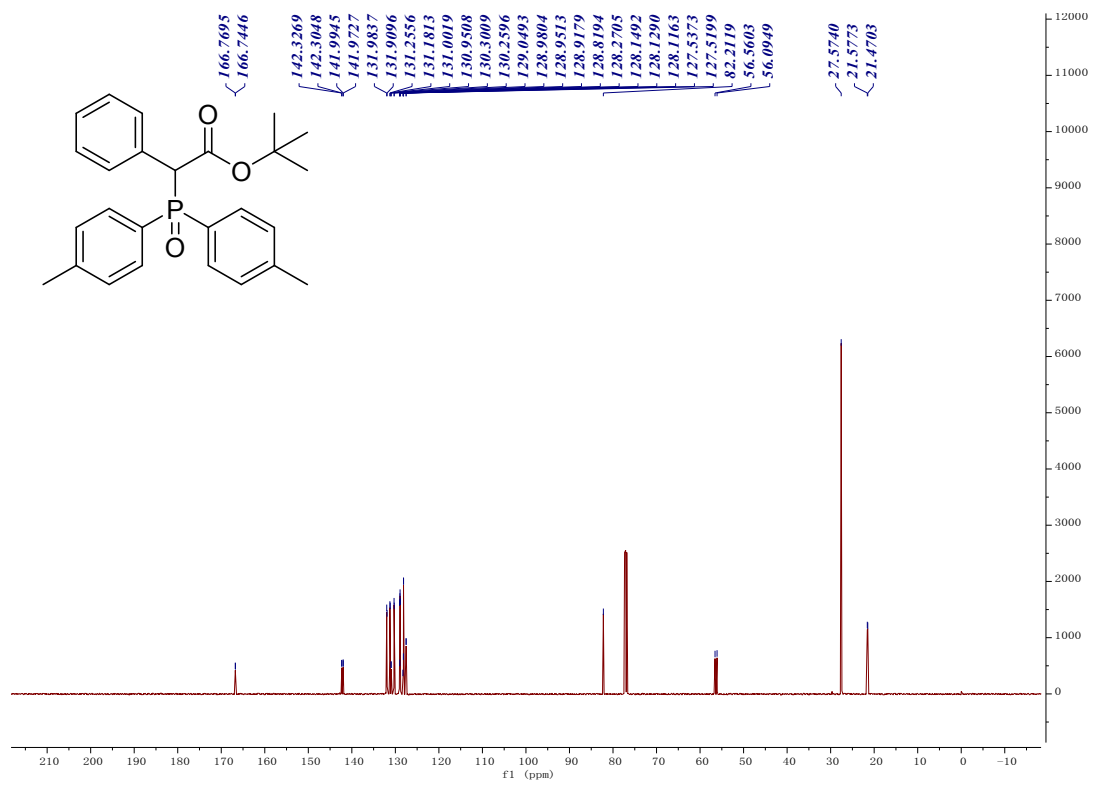

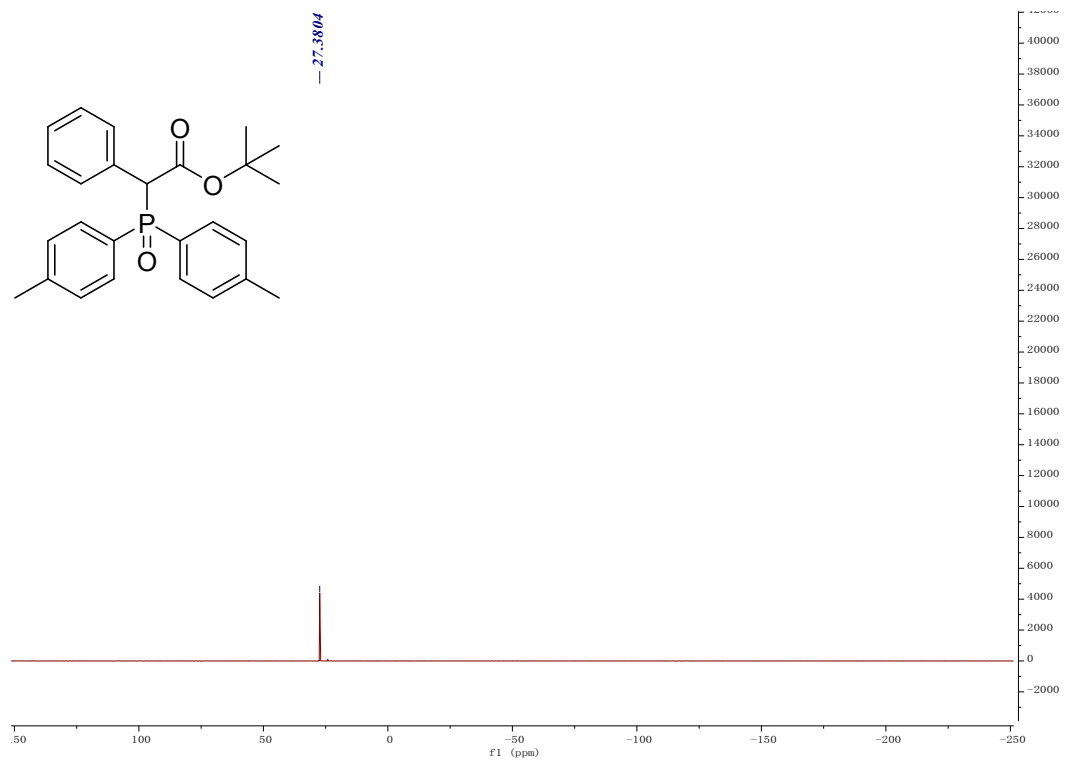

**Tert-butyl 2-(diphenylphosphoryl)-2-phenylacetate (3j)**

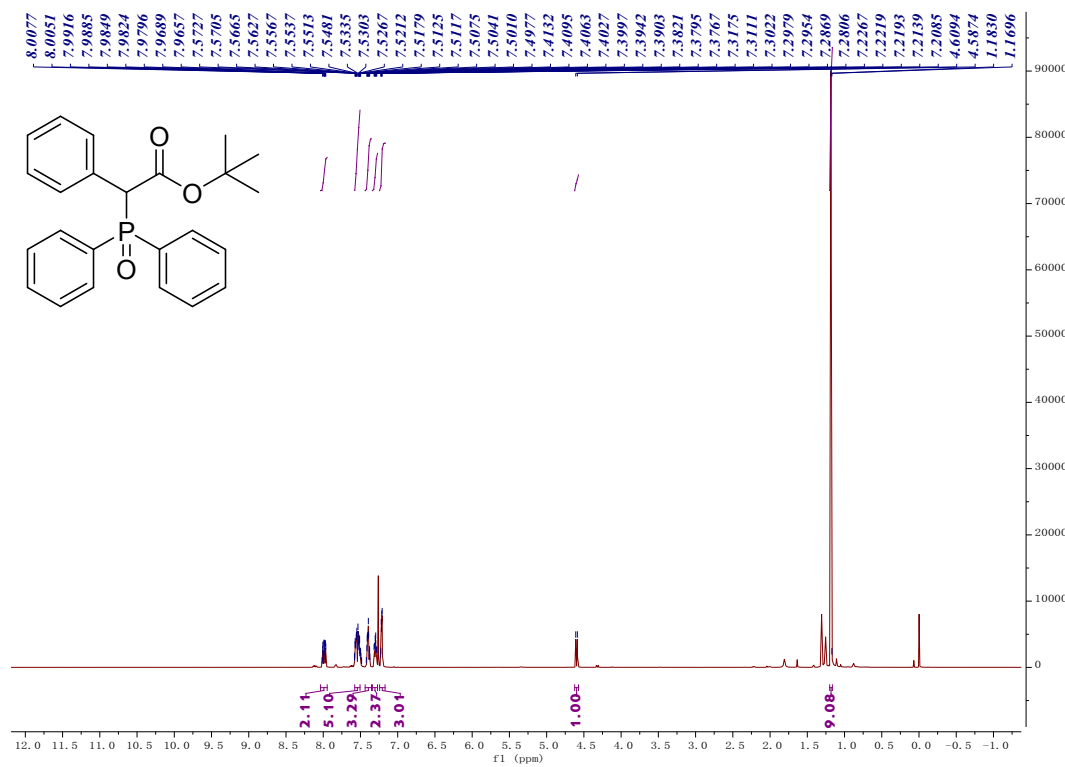

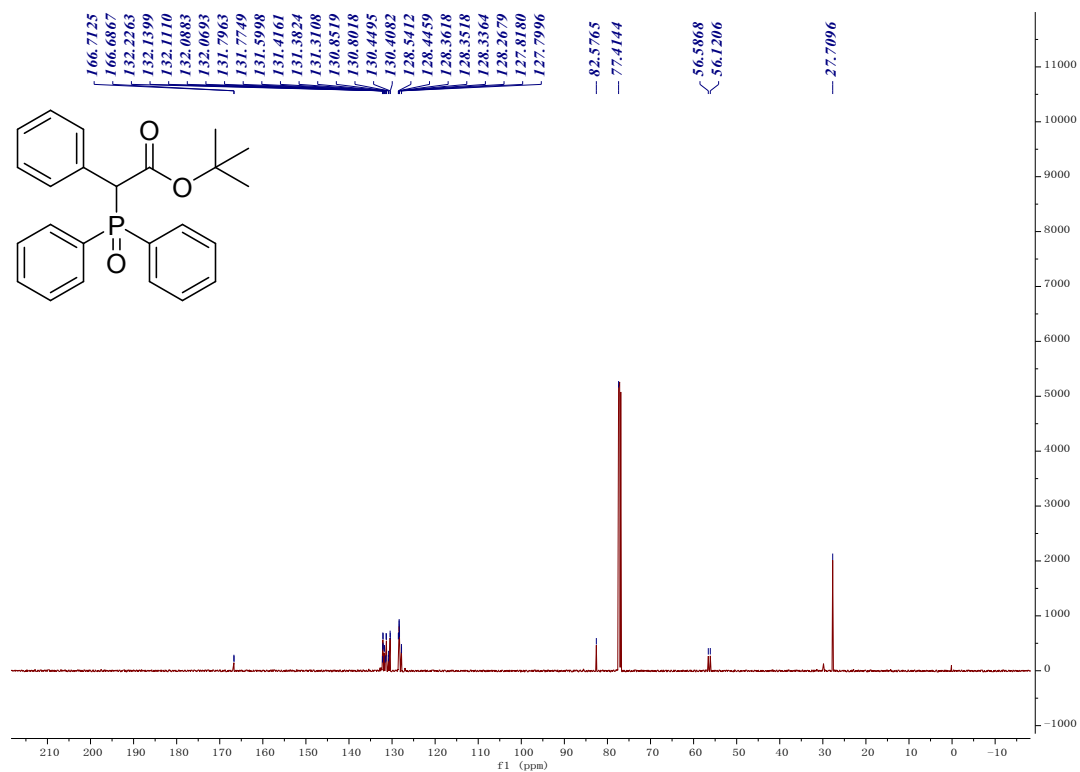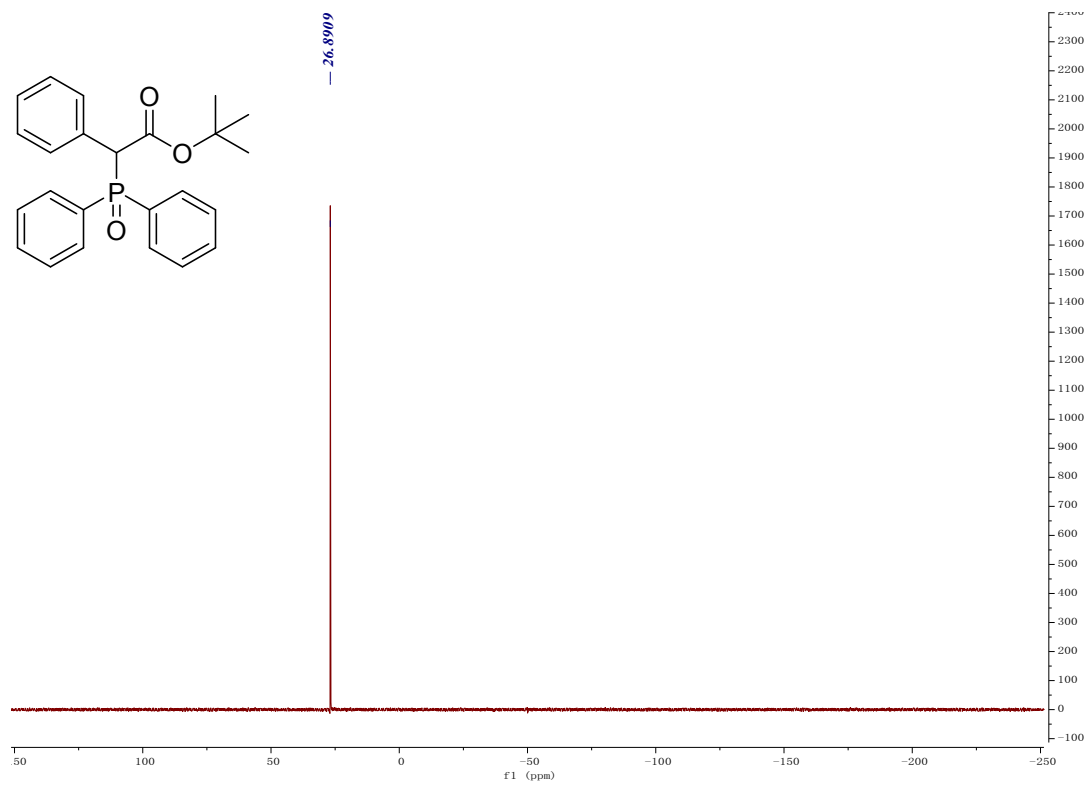

**Tert-butyl 2-(benzyl(phenyl)phosphoryl)-2-phenylacetate (3k)**

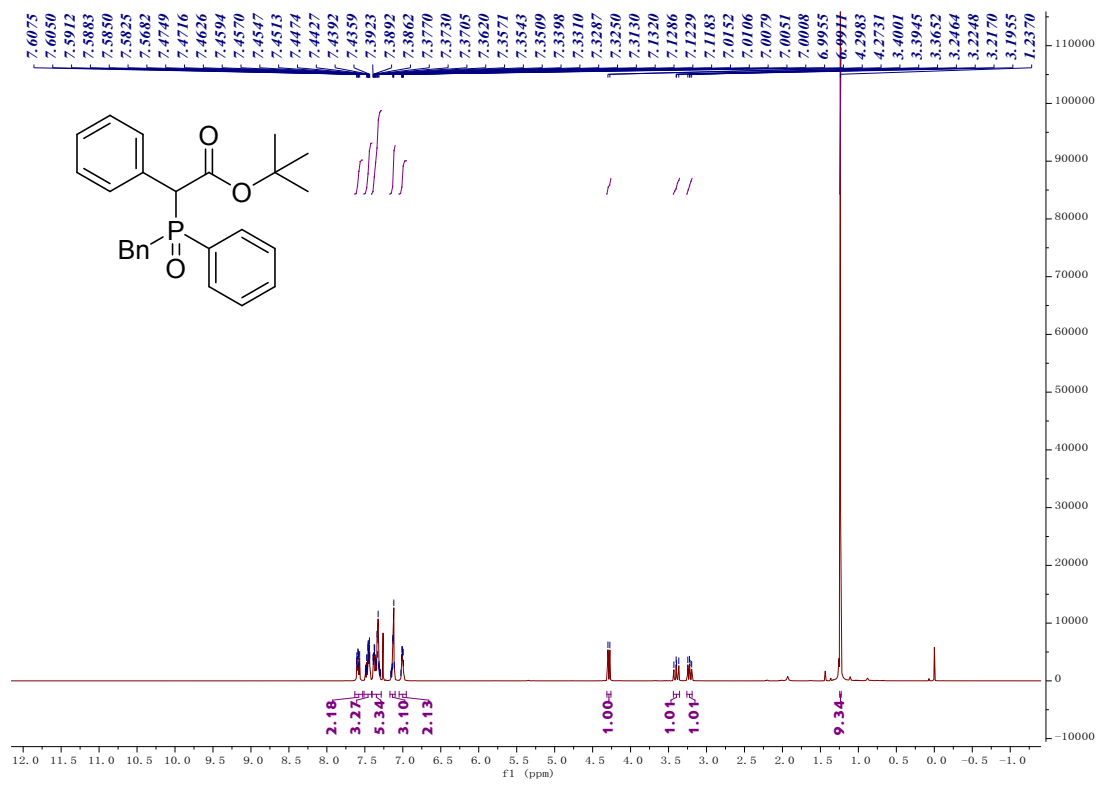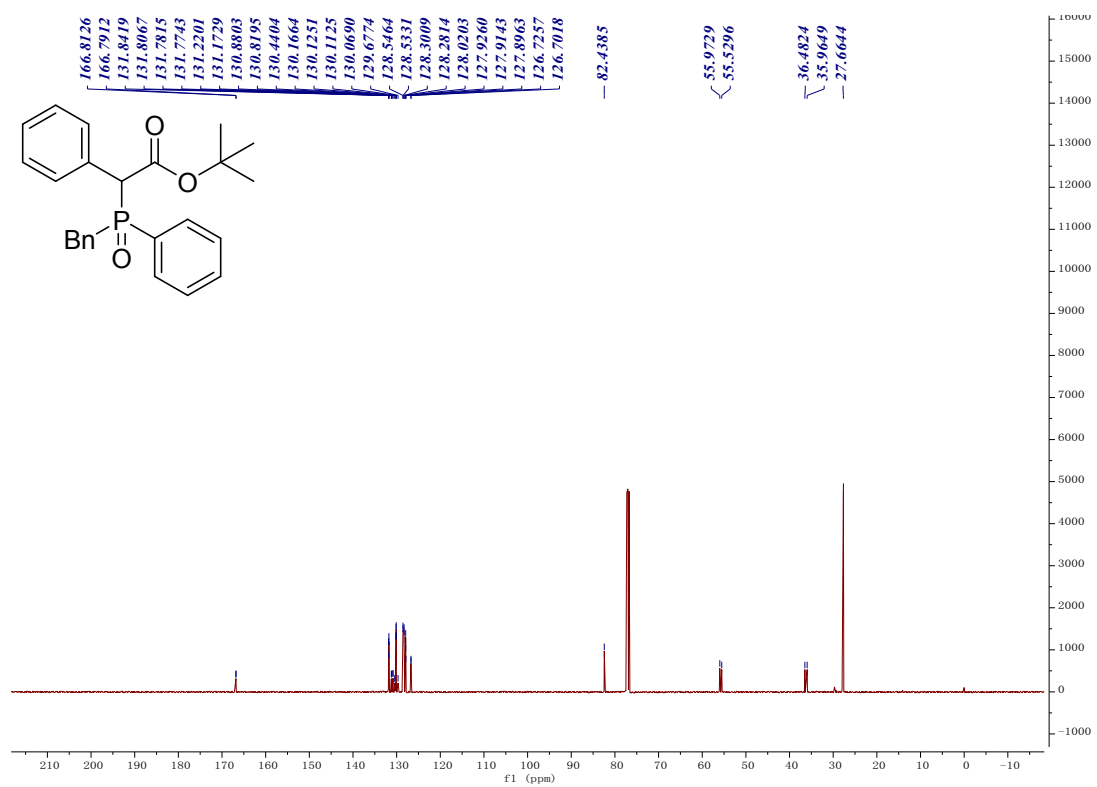

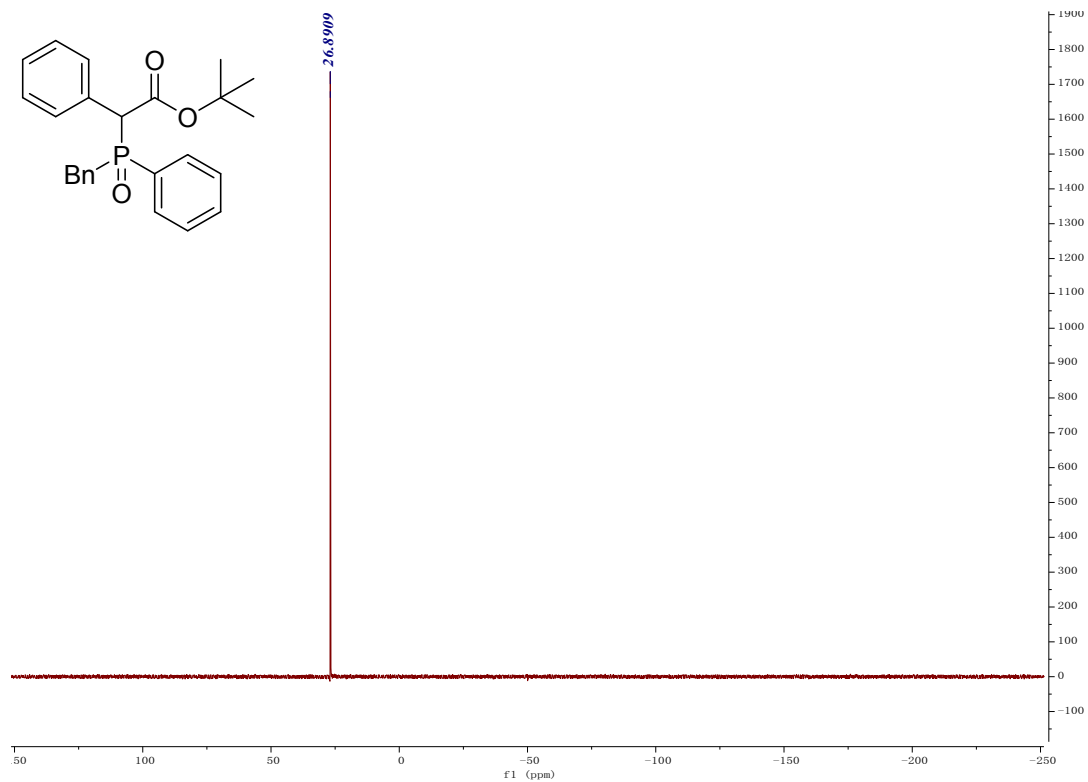

### Methyl 2-(di-p-tolylphosphoryl)-2-(naphthalen-2-yl)acetate (3I)

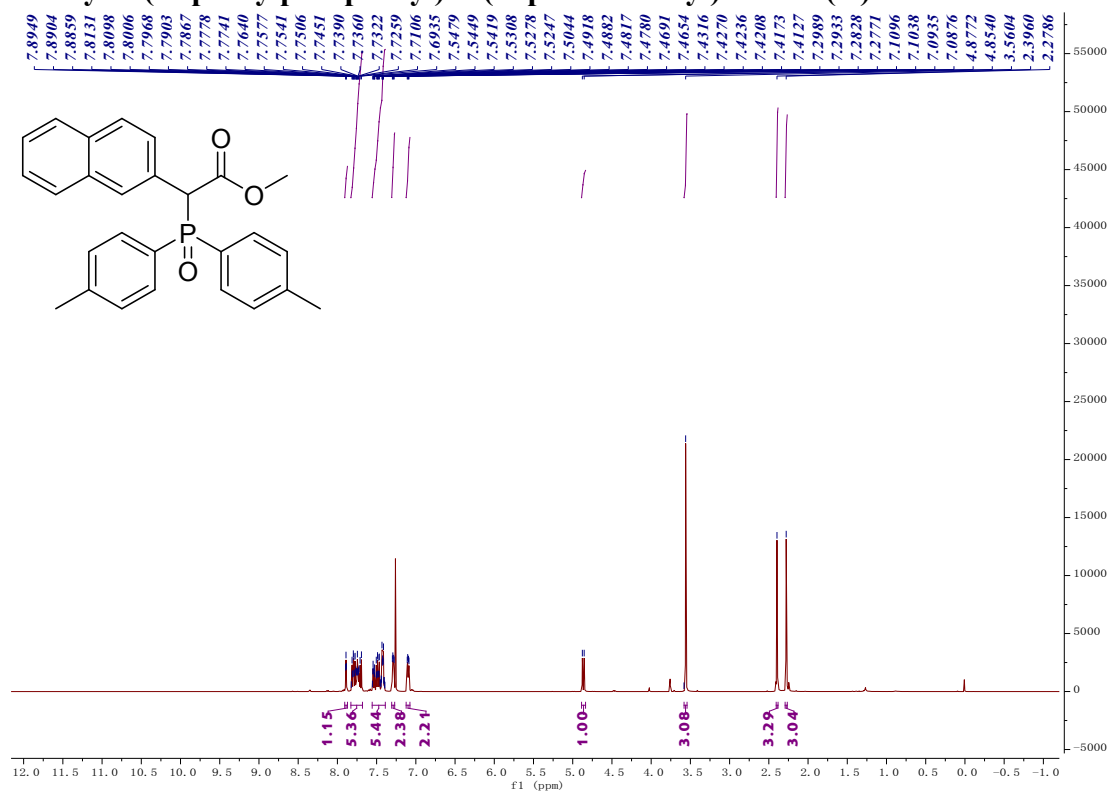

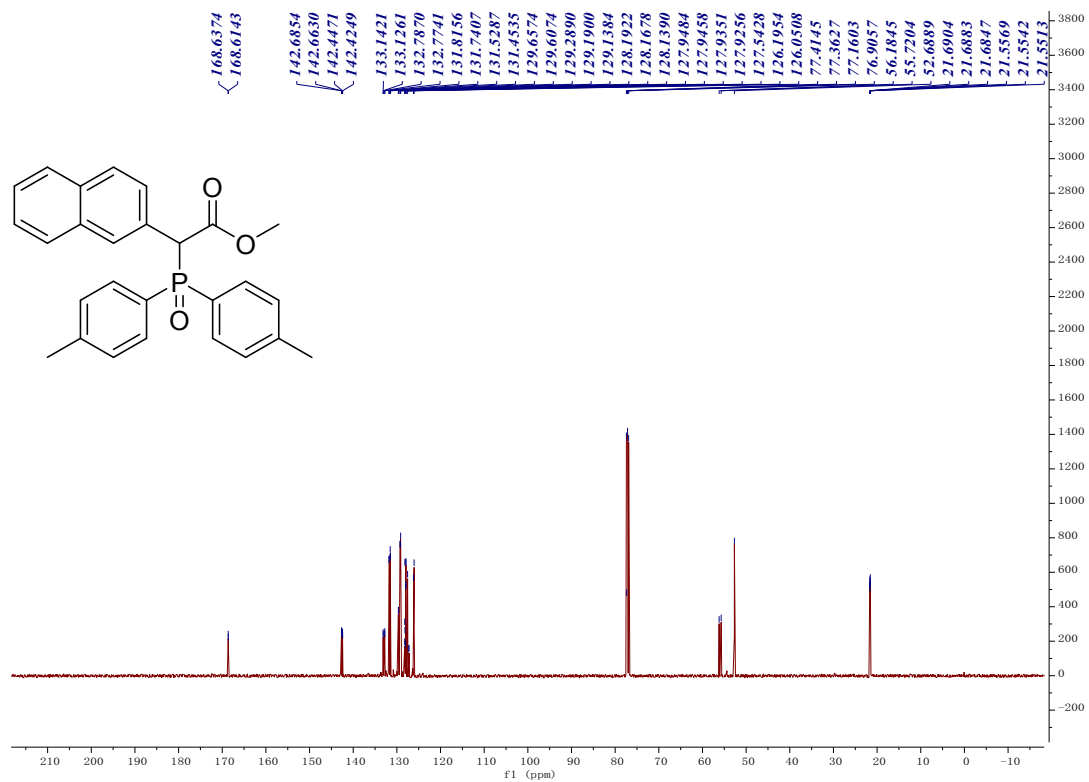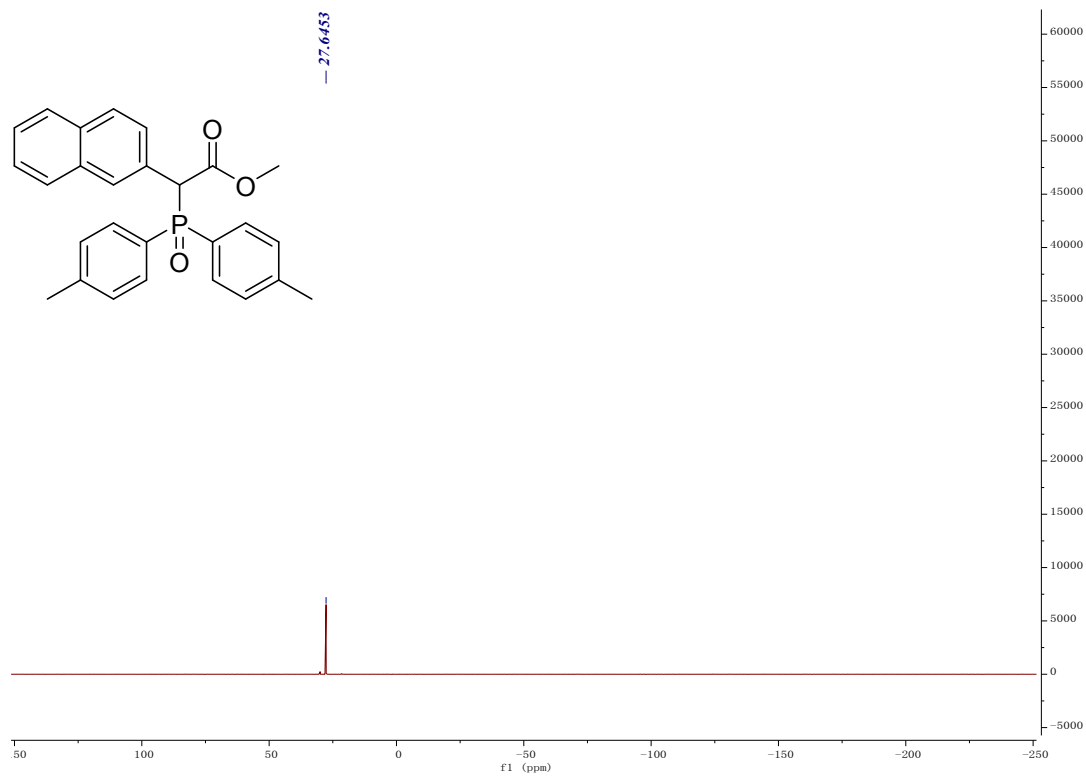

**Methyl 2-(di-p-tolylphosphoryl)-2-(naphthalen-1-yl)acetate (3m)**

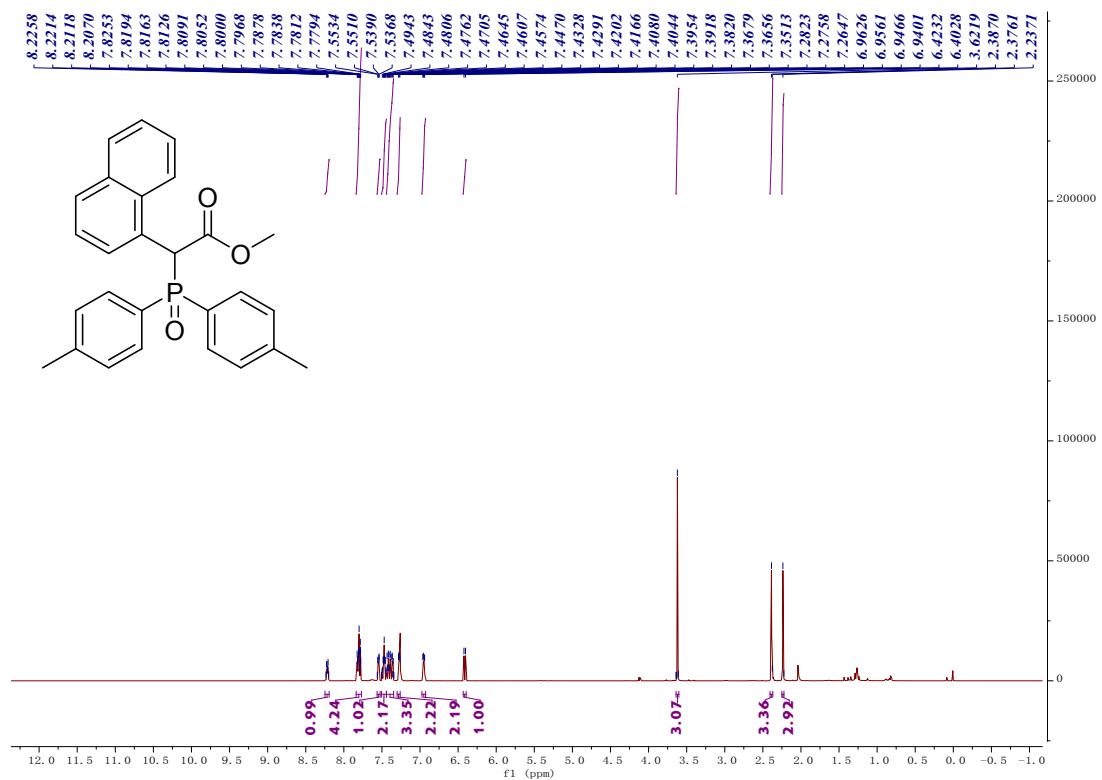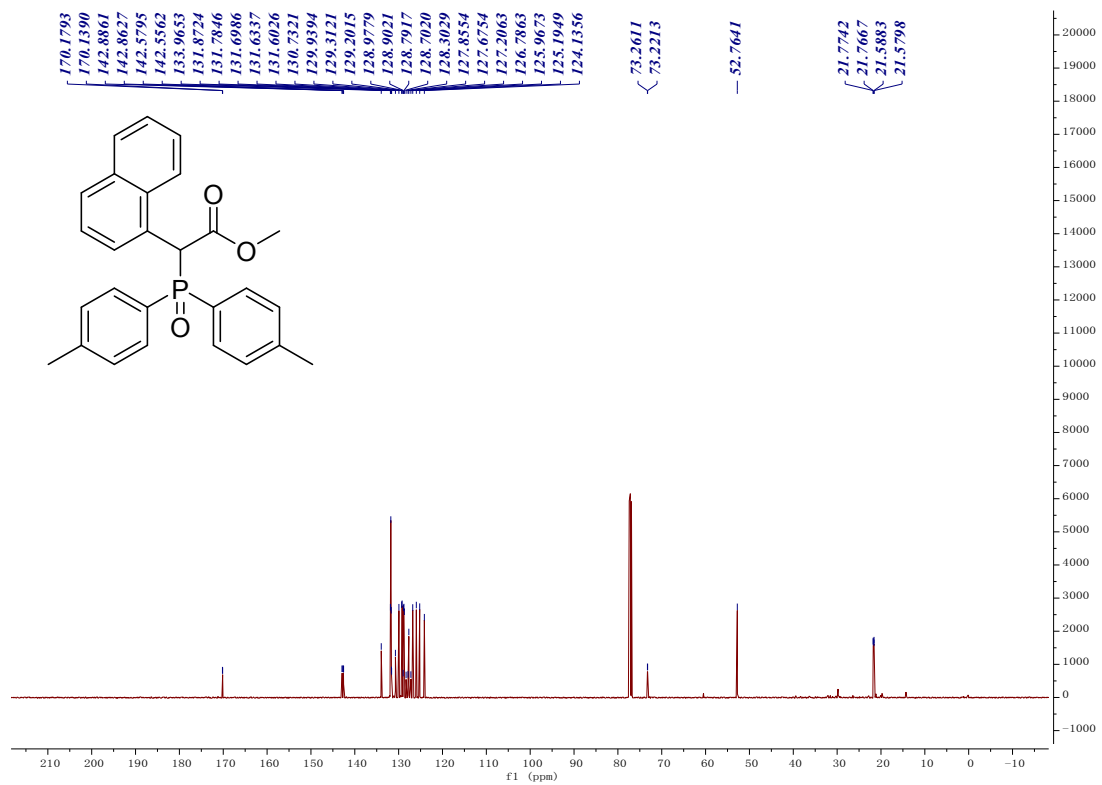

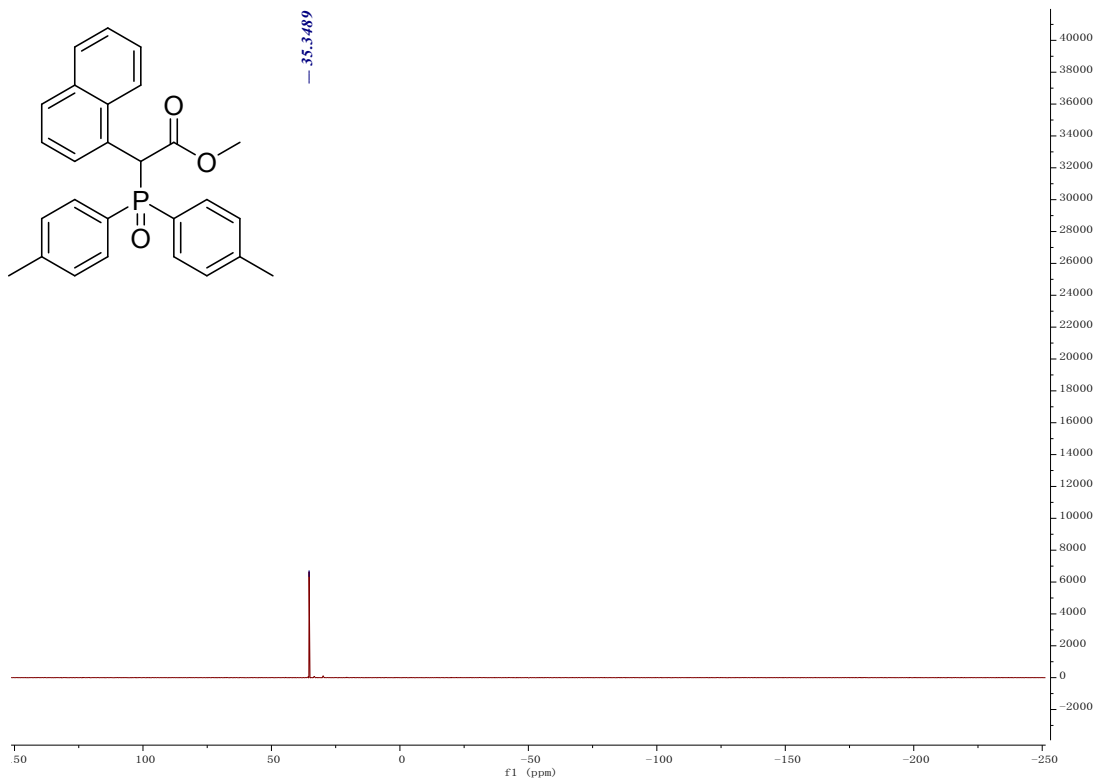

### Methyl 2-((1,1'-biphenyl)-4-yl)-2-(di-p-tolylphosphoryl)acetate (3n)

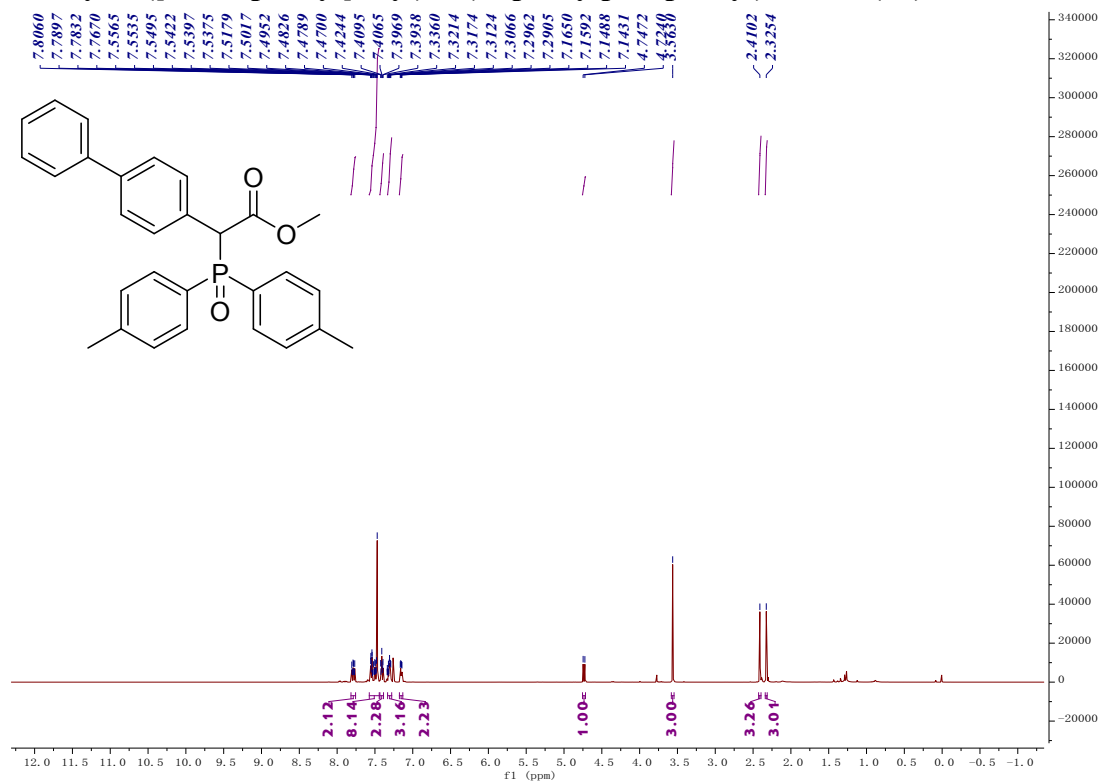





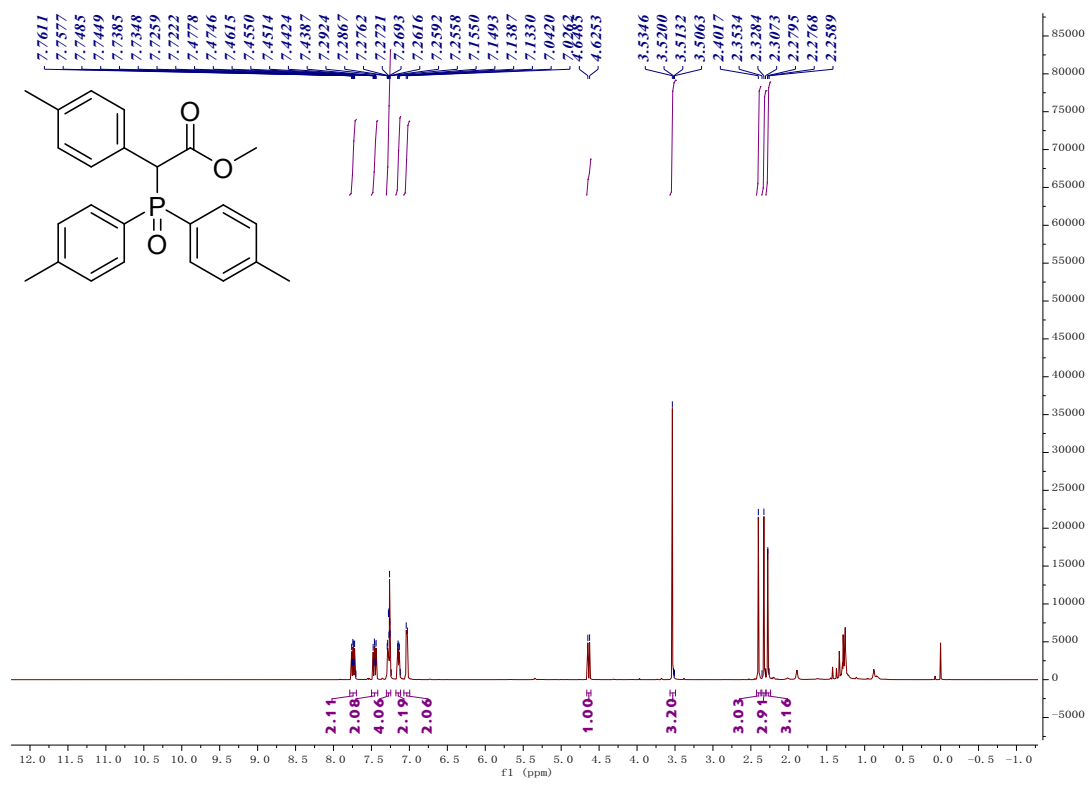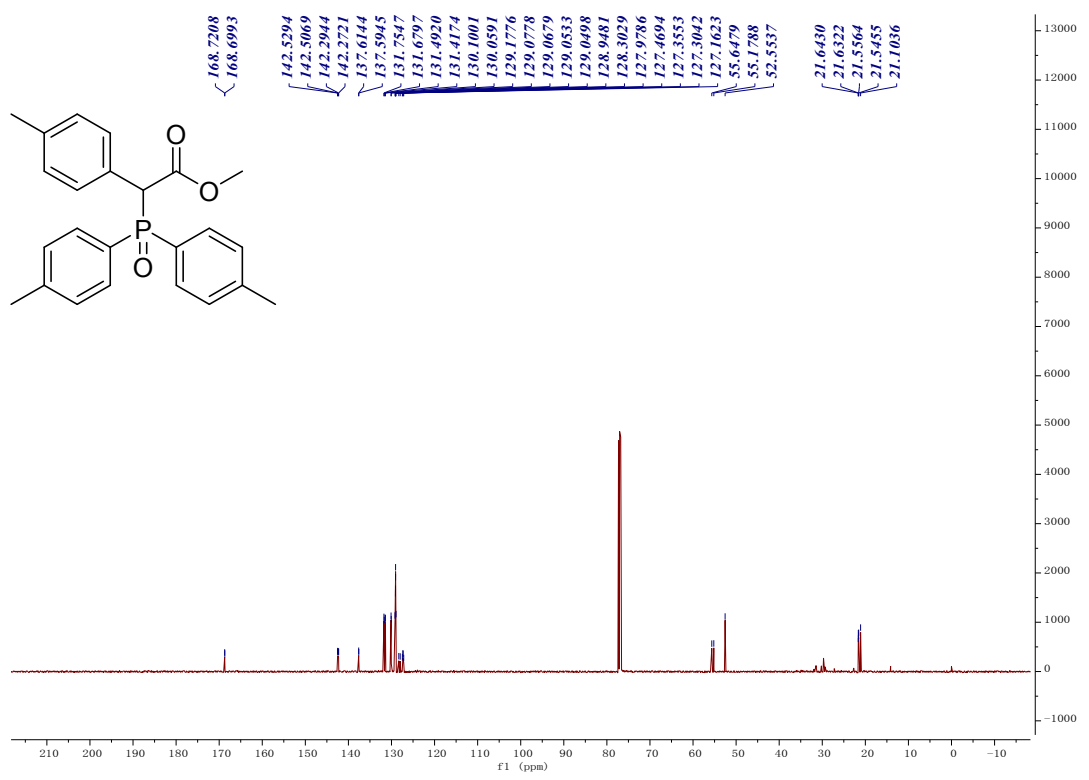

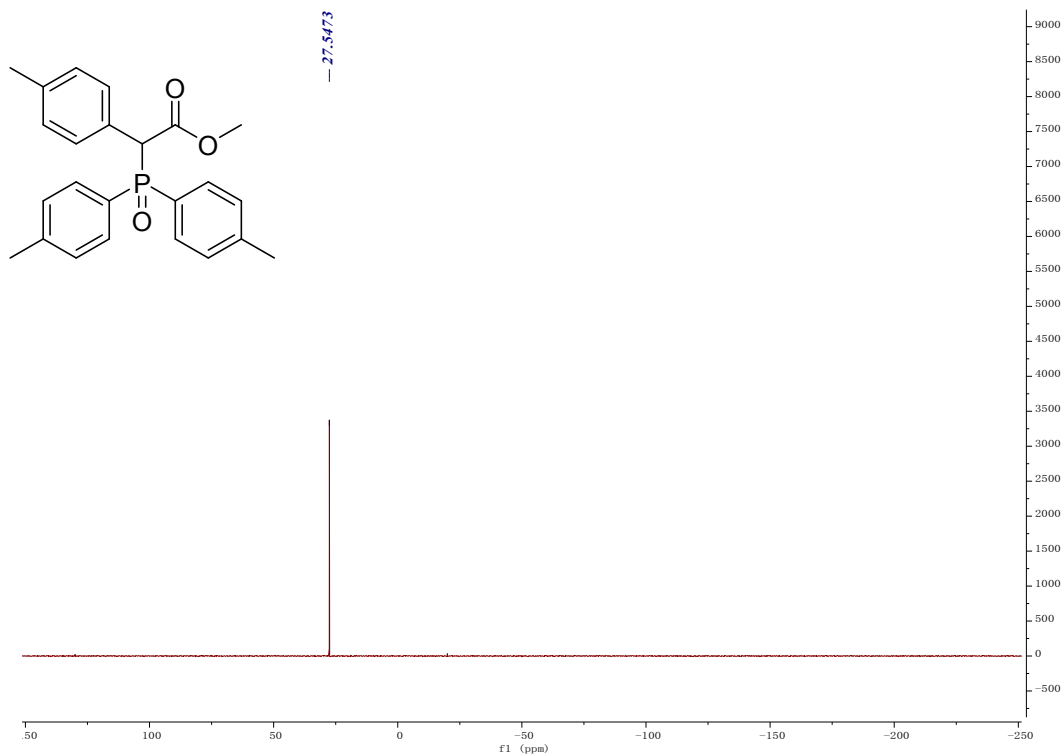

### Methyl 2-(diphenylphosphoryl)-2-(p-tolyl)acetate (3p)

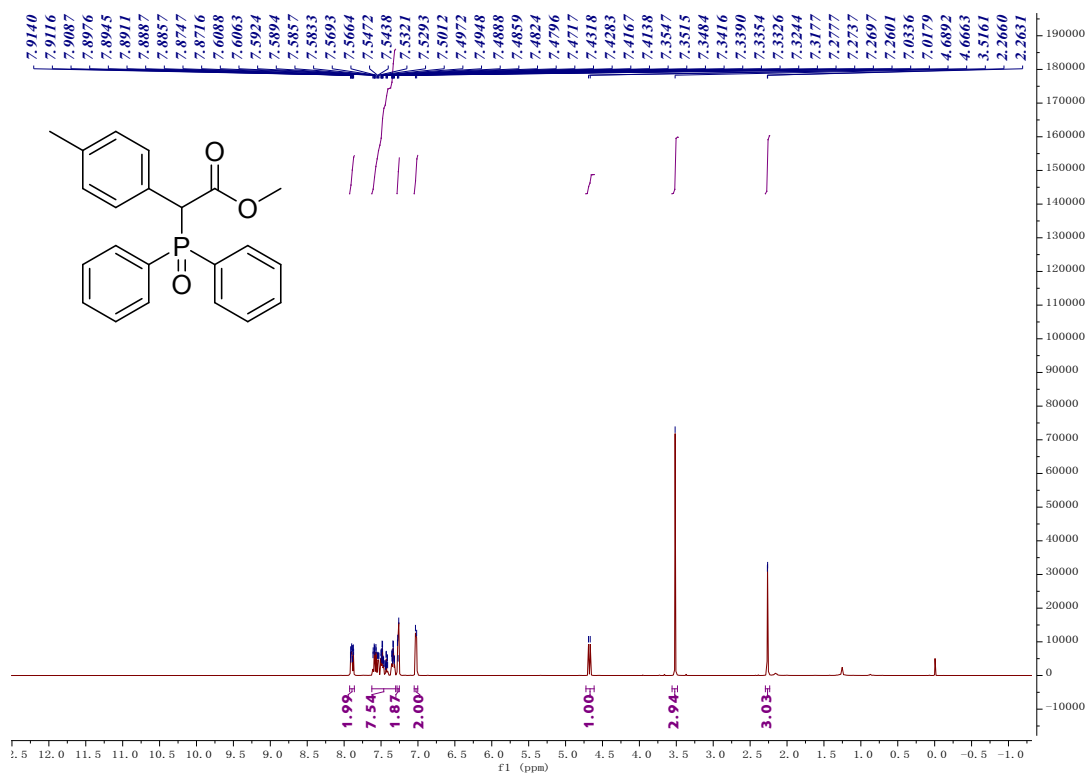

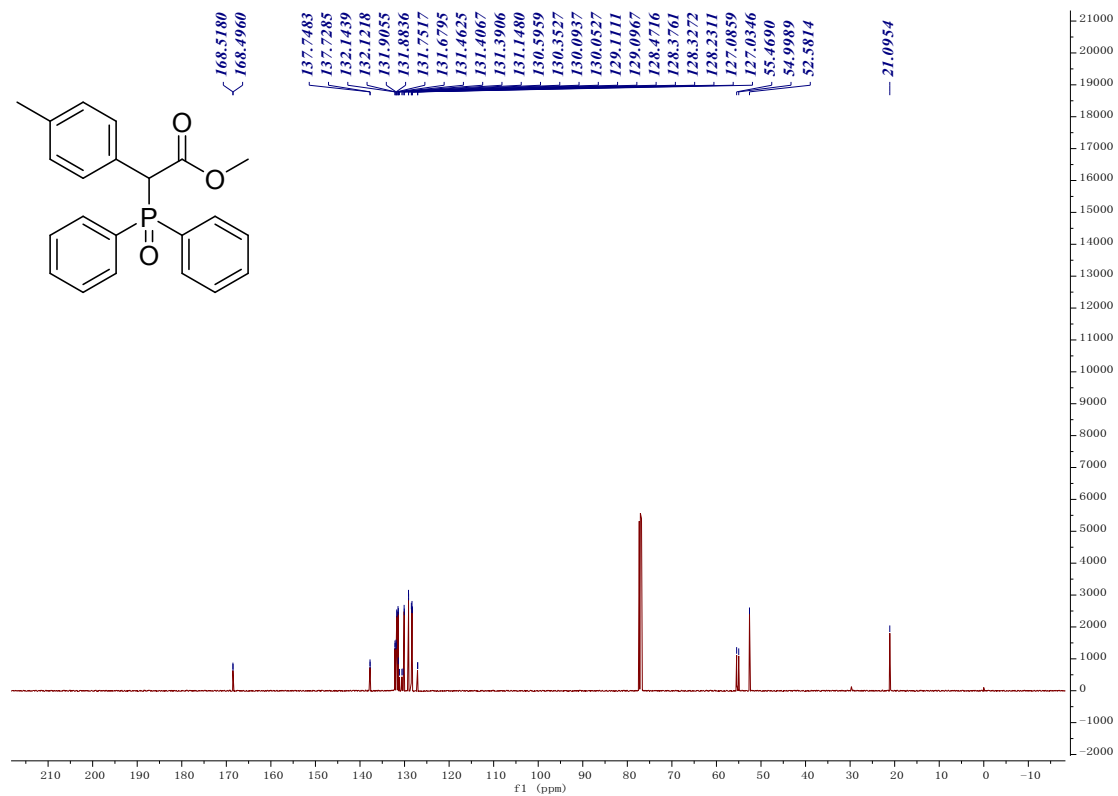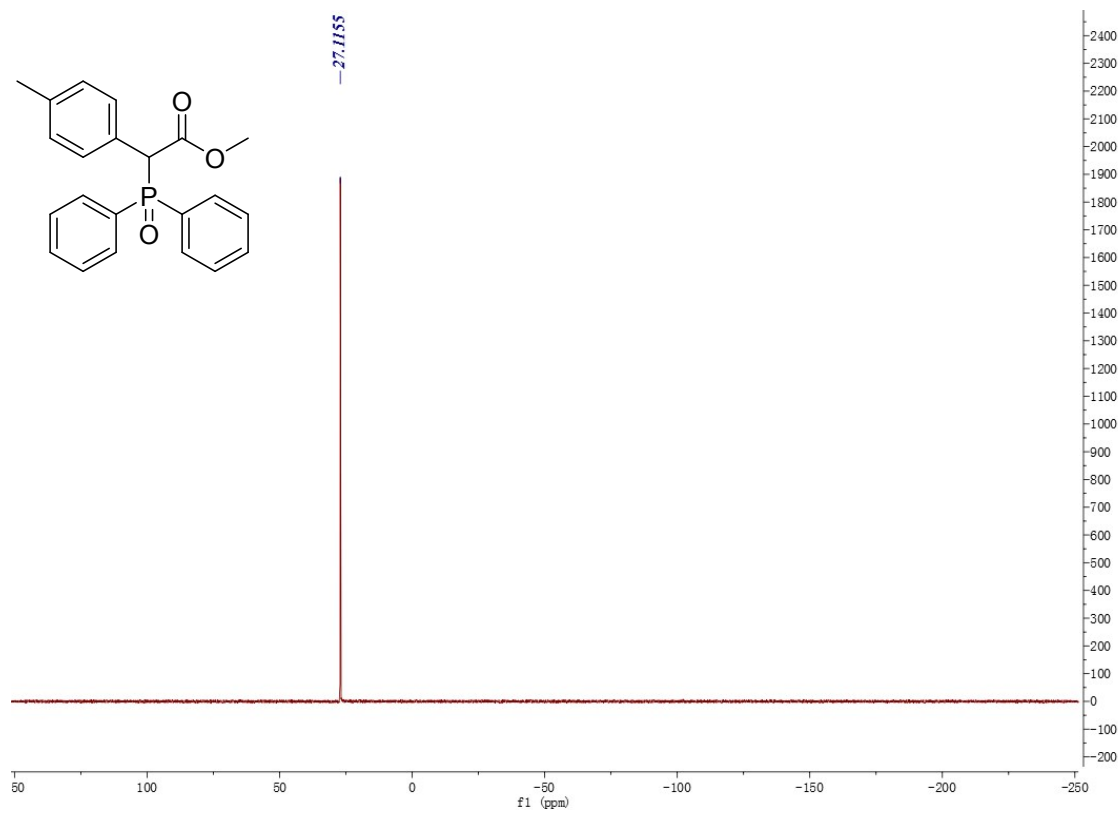

**Methyl 2-(di-p-tolylphosphoryl)-2-(3-methoxyphenyl)acetate (3q)**

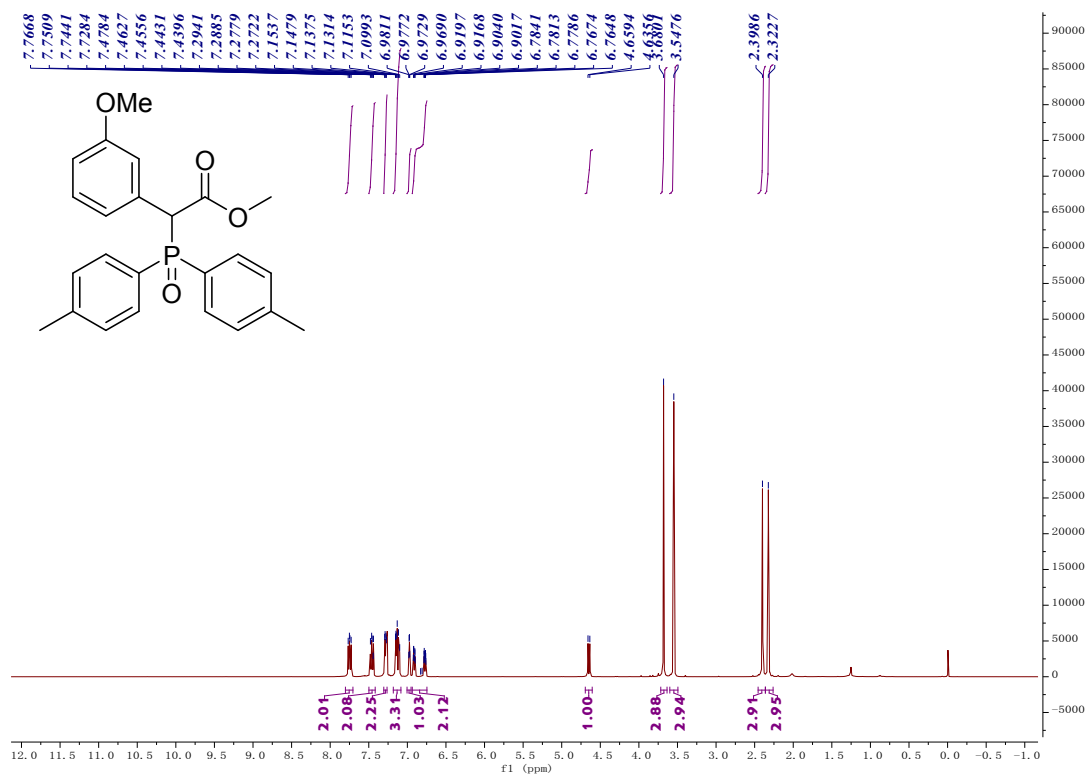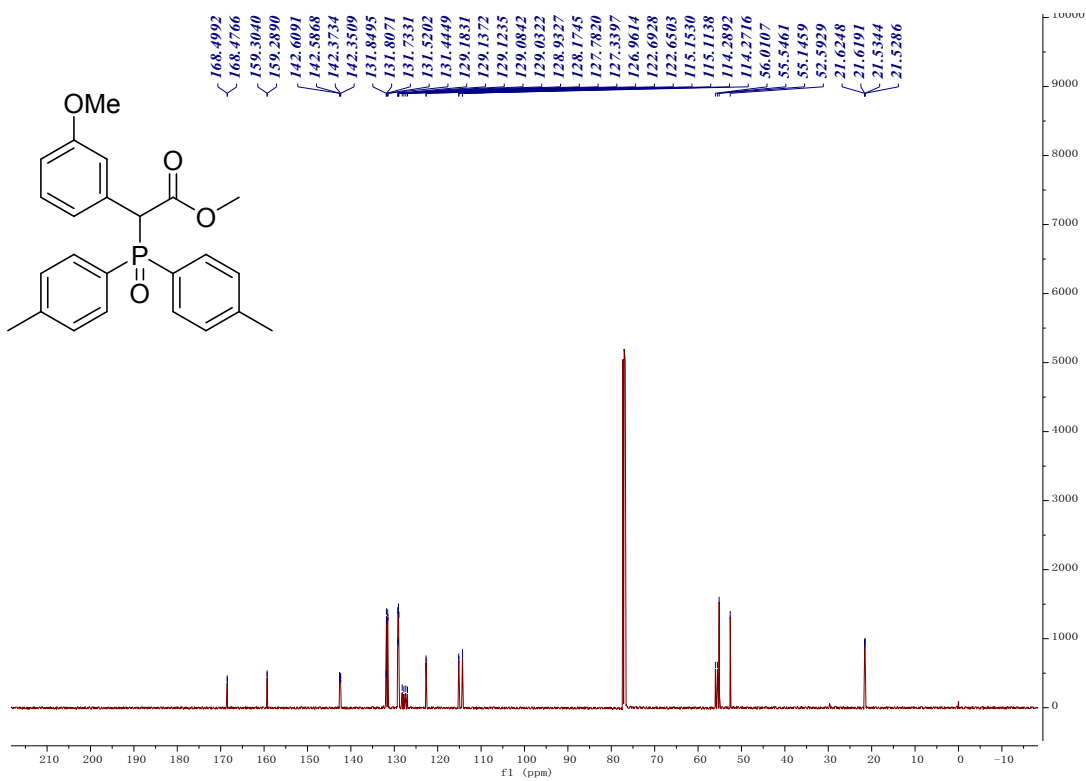

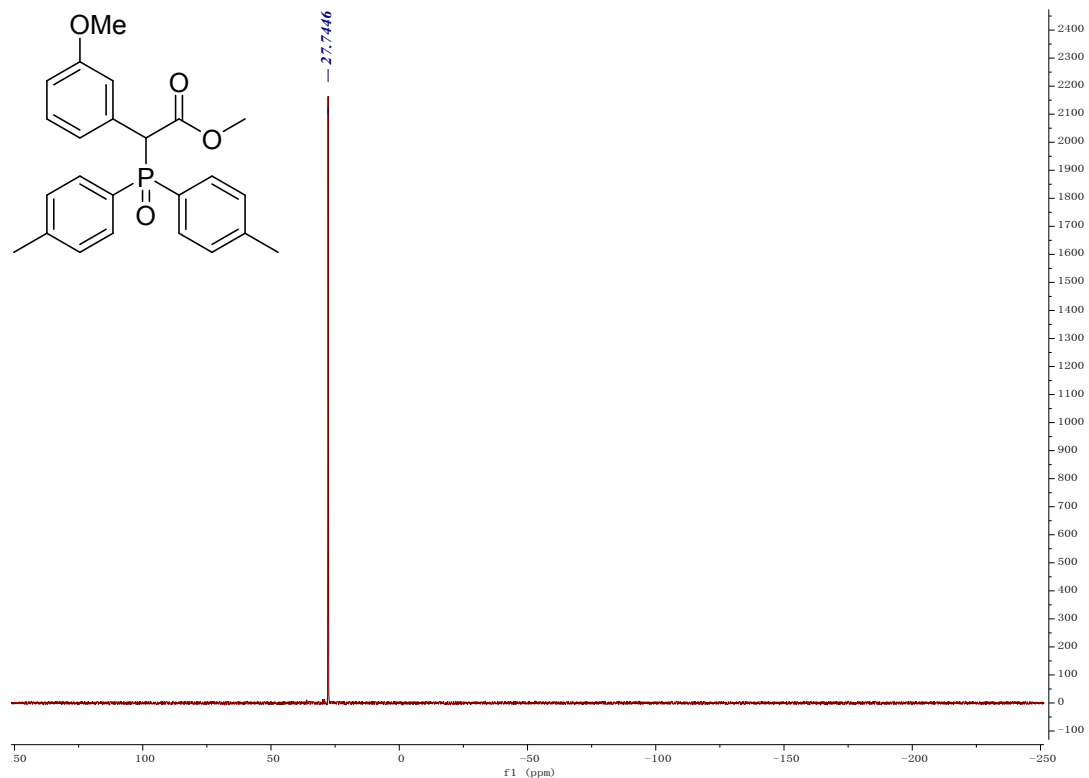

**Methyl 2-(di-p-tolylphosphoryl)-2-(2-methoxyphenyl)acetate (3r)**

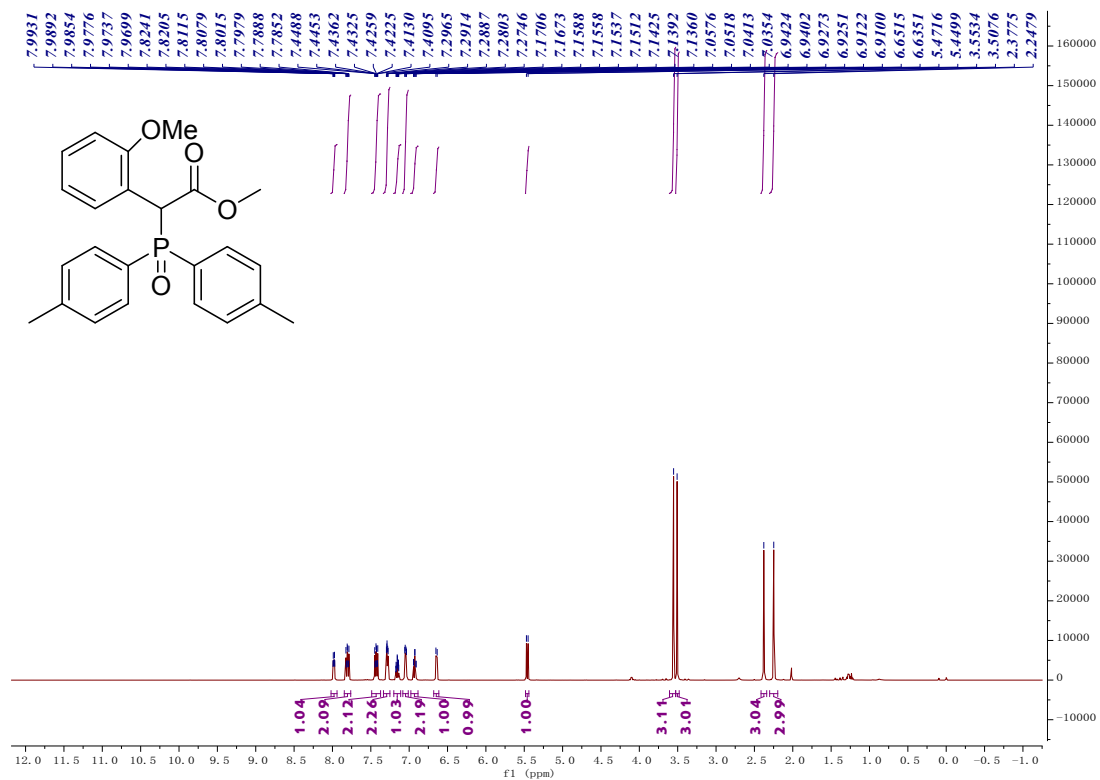

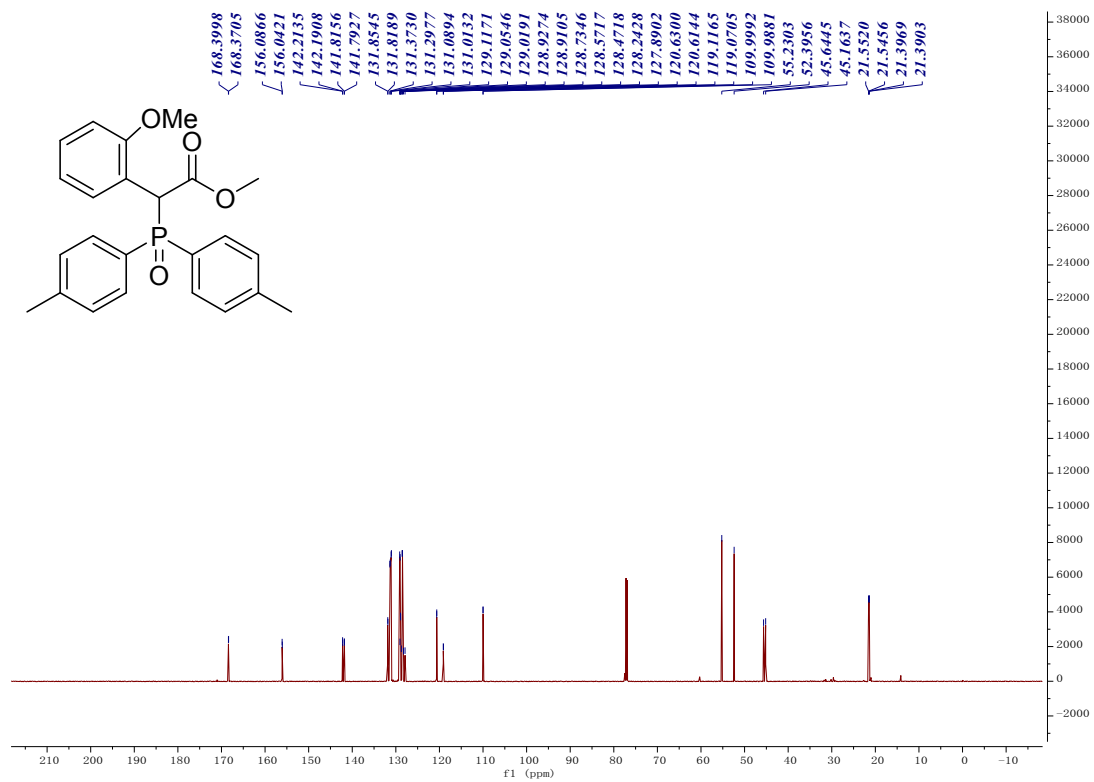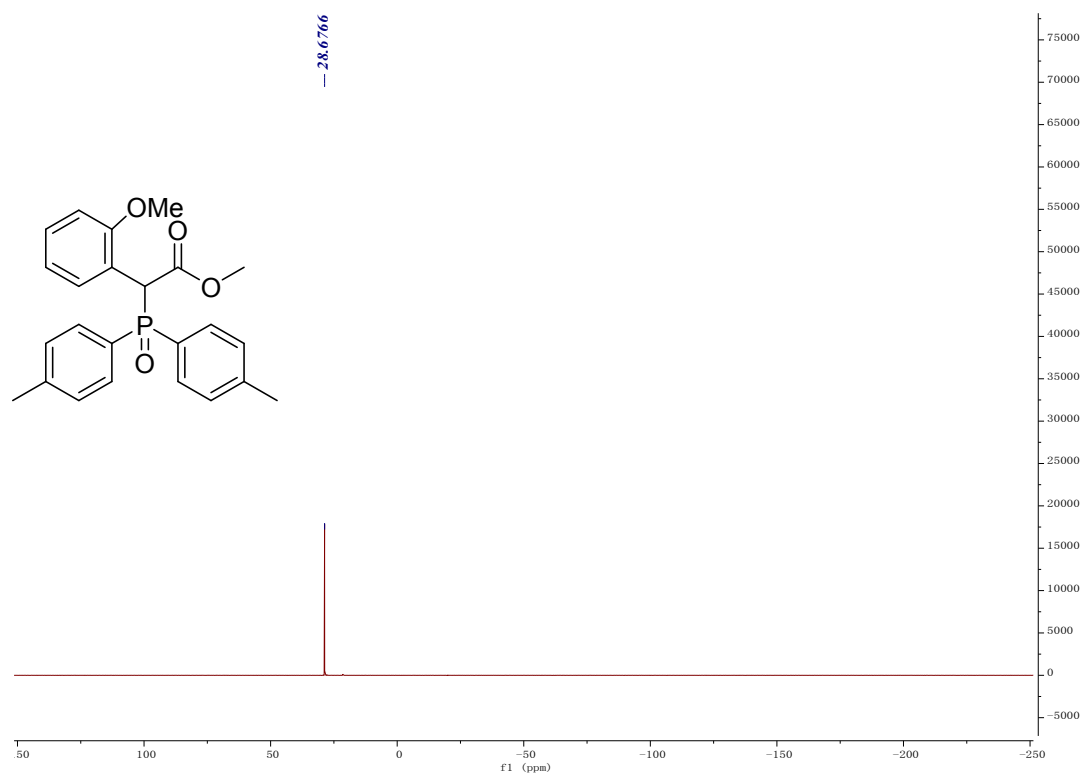

**Methyl 2-(di-p-tolylphosphoryl)-2-(4-fluorophenyl)acetate (3s)**

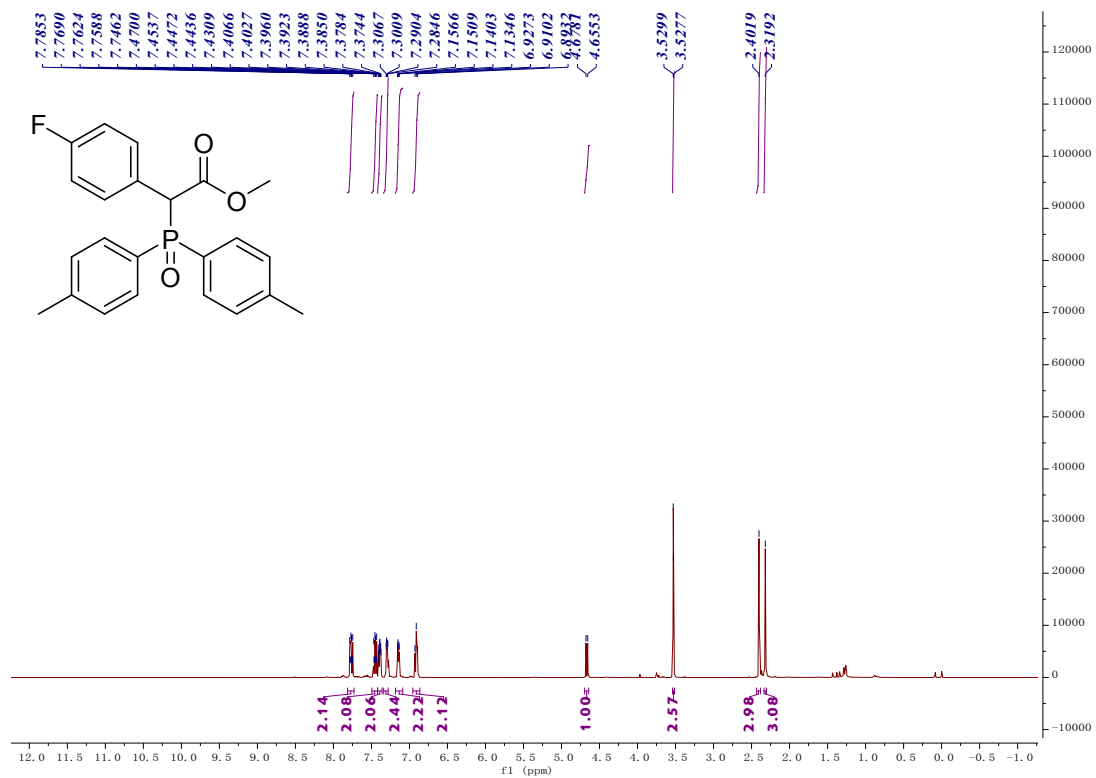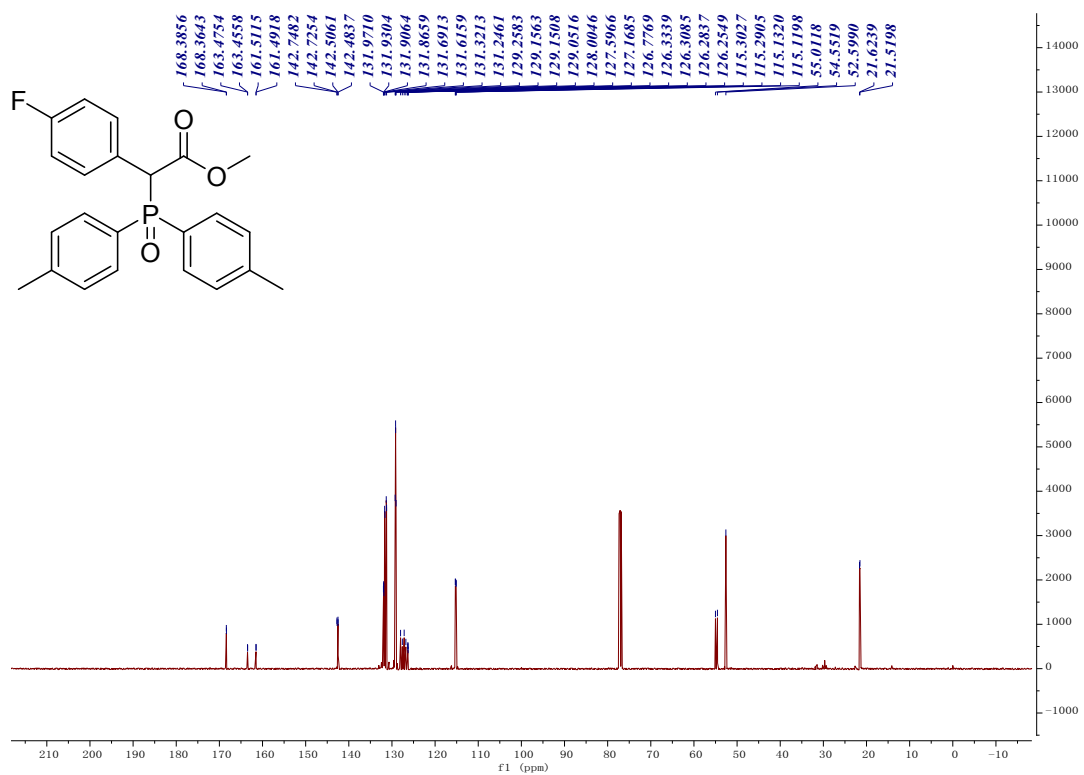



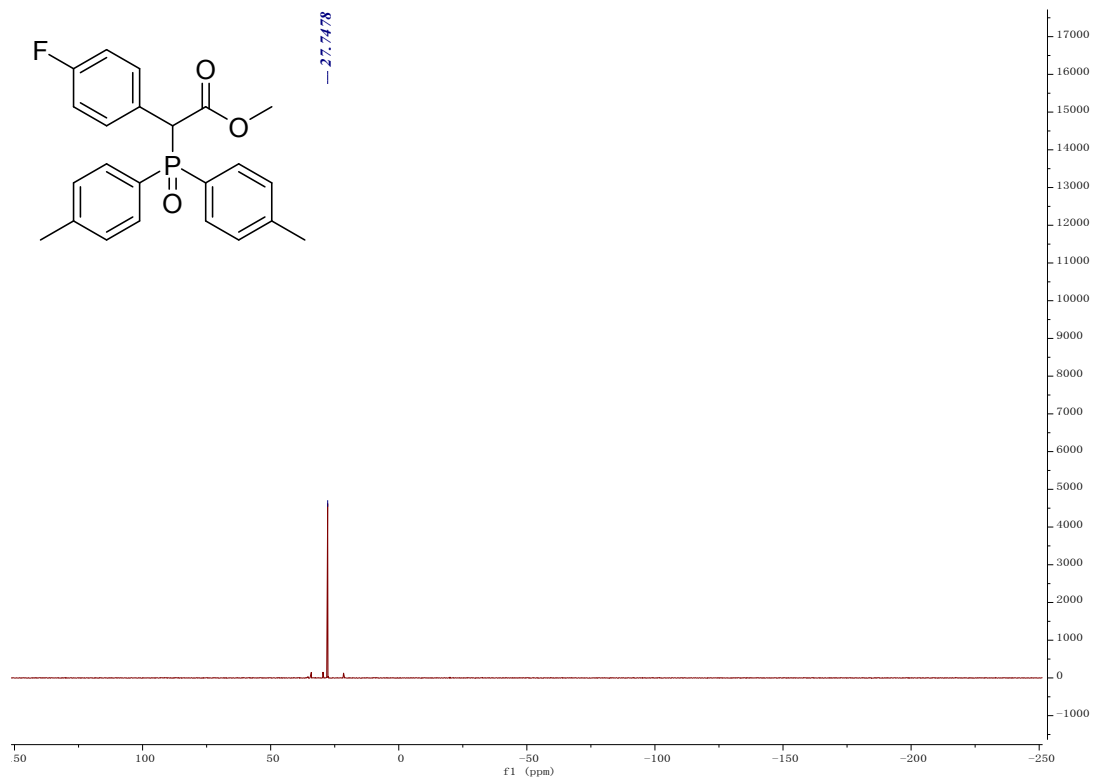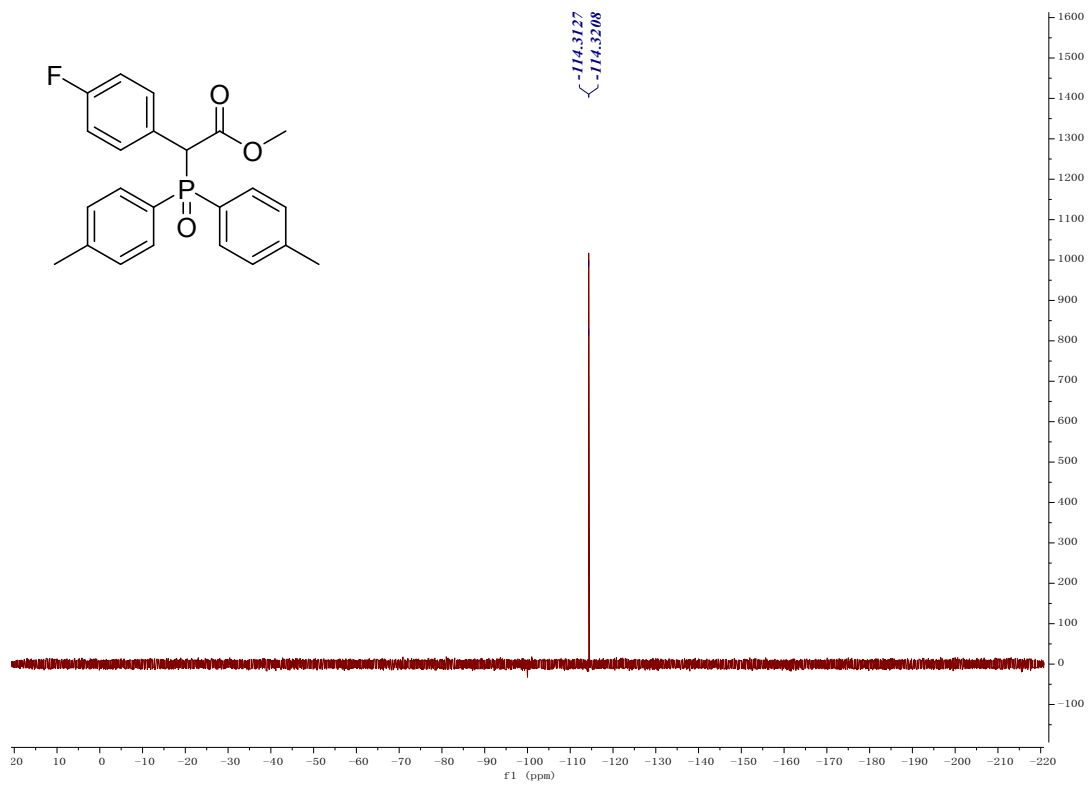

**Methyl 2-(4-chlorophenyl)-2-(di-p-tolylphosphoryl)acetate (3t)**

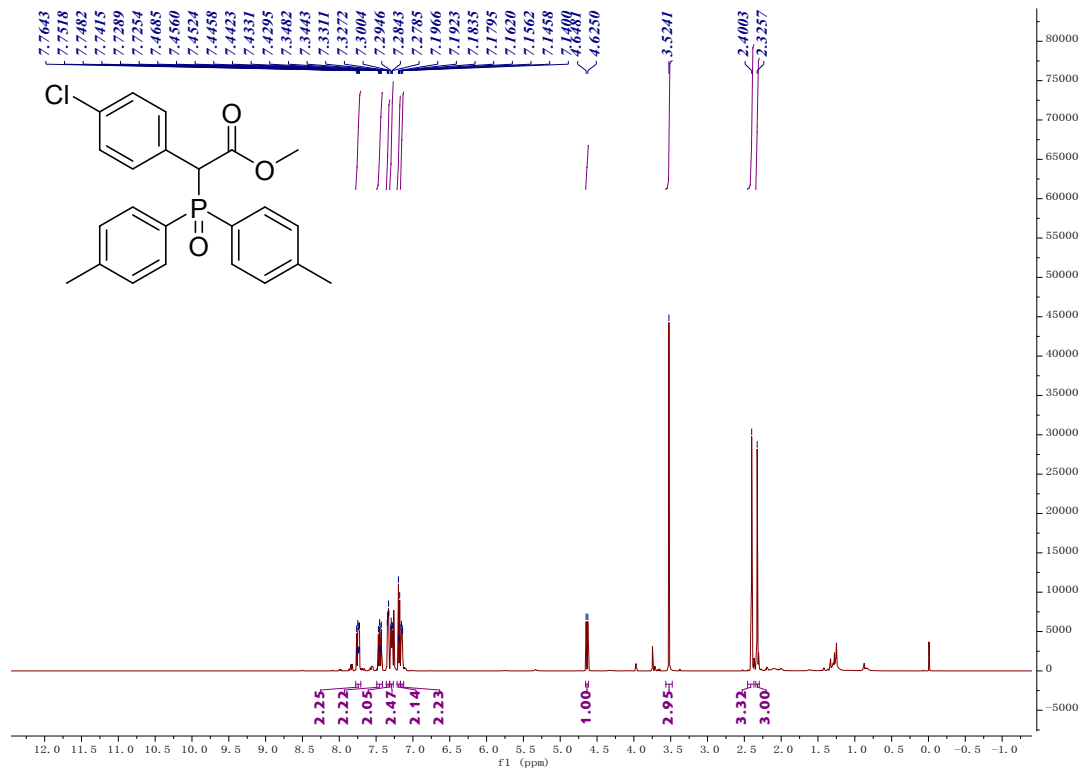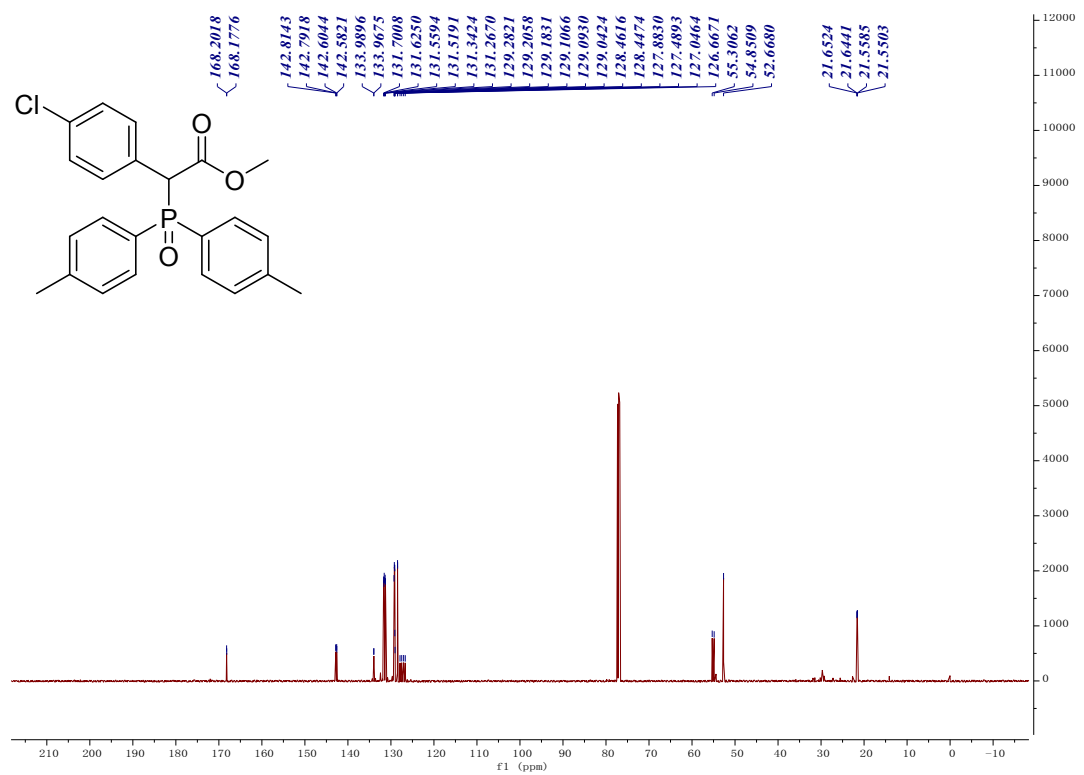

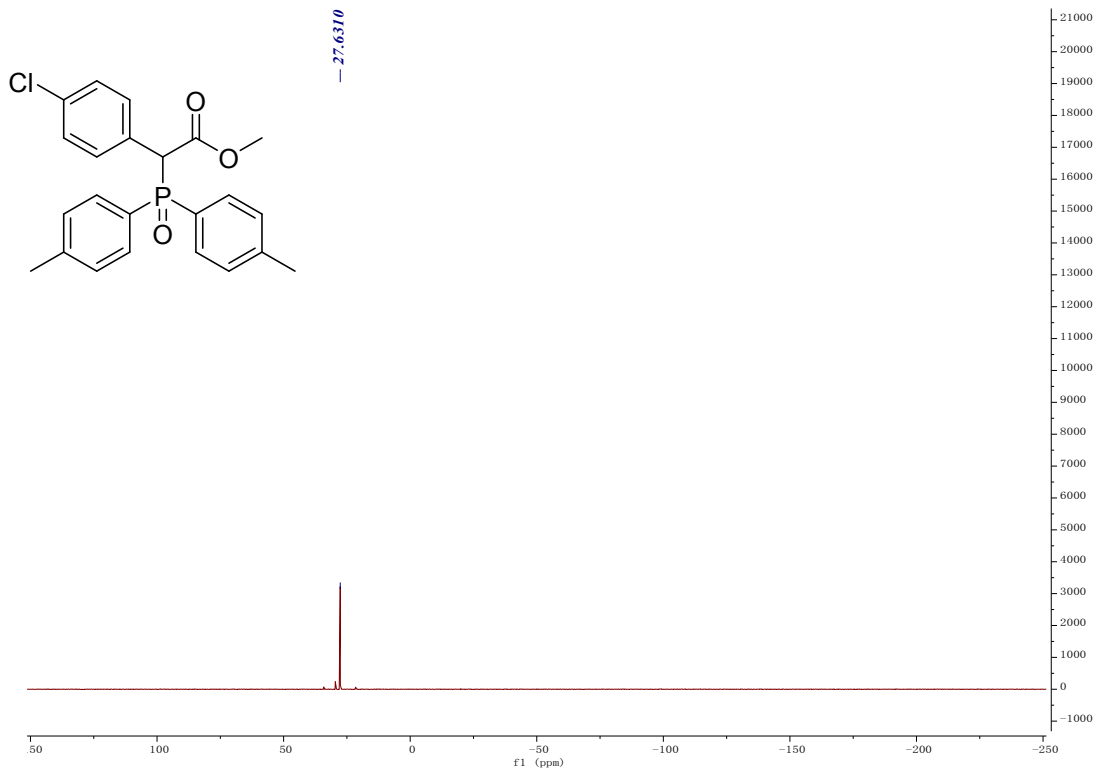

**Methyl 2-(4-bromophenyl)-2-(di-p-tolylphosphoryl)acetate (3u)**

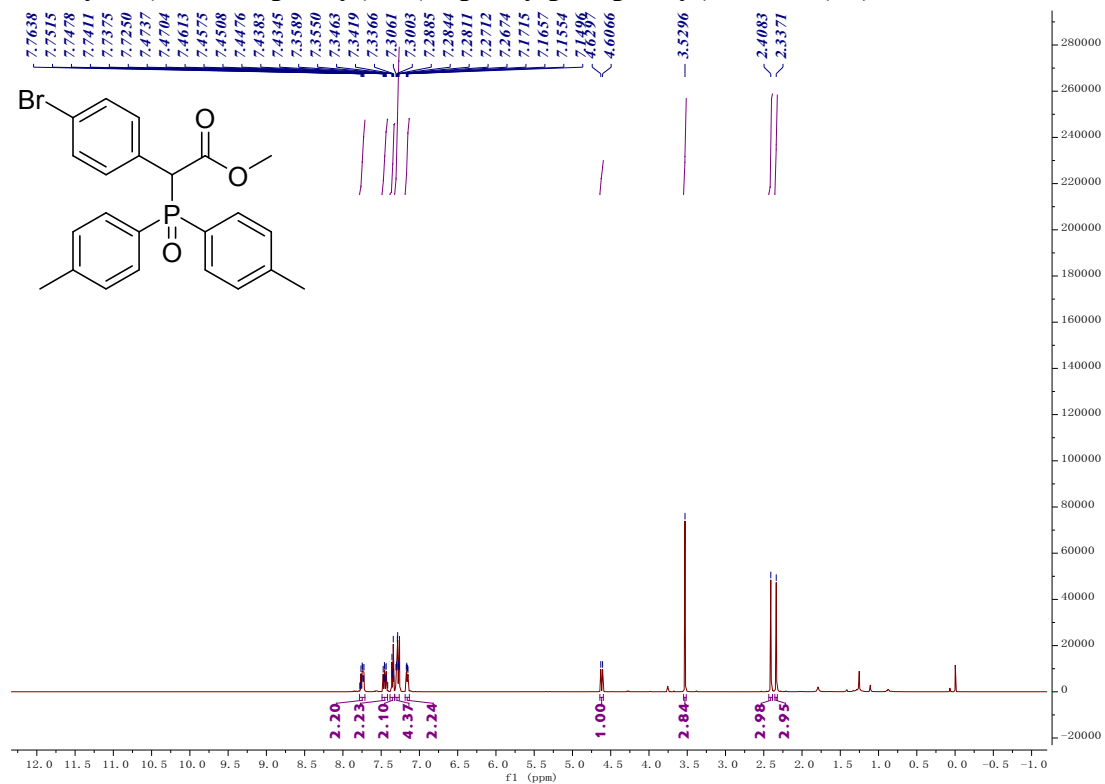

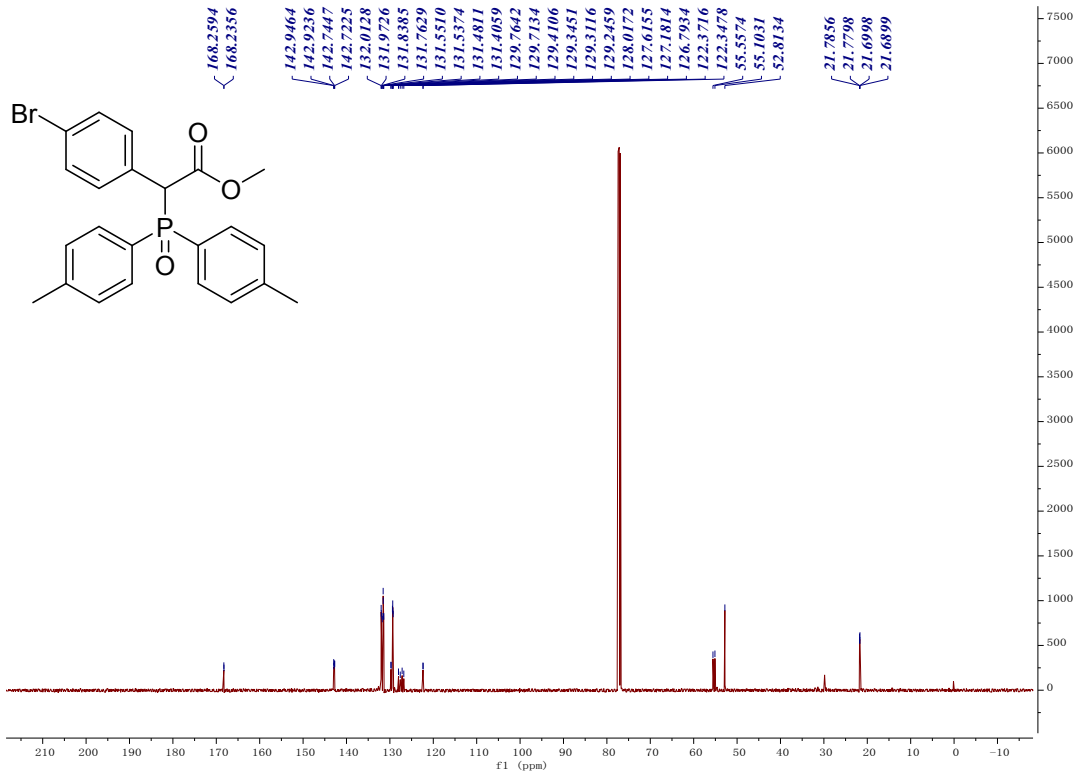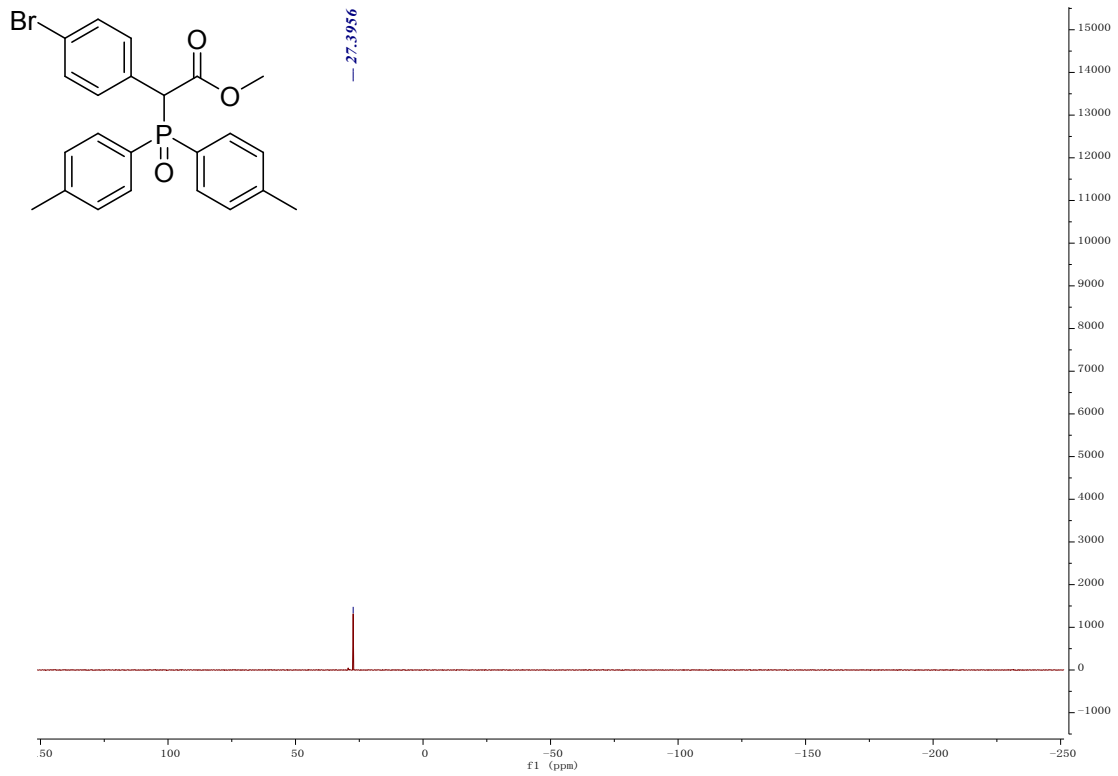

Supplement: d1ob00948f1.pdf [file d1ob00948f1.pdf]
